# Supplementary material for: Electrochemically enabled (3+2) cycloaddition of unbiased alkenes and β-dicarbonyls
Source: Royal Society of Chemistry journal article supplement (doi:10.1039/d4cc01263a), 2024-01-01

## Supporting information

## Table of contents

|                                                                |     |
|----------------------------------------------------------------|-----|
| General remarks.....                                           | S3  |
| Starting materials.....                                        | S3  |
| Preparation of starting materials.....                         | S4  |
| Preparation of Cobalt-Complex.....                             | S7  |
| General procedure for electrochemical (3+2) cycloaddition..... | S8  |
| Electrochemical reaction in 1 mmol scale.....                  | S8  |
| Optimization table.....                                        | S9  |
| Characterization data for compounds.....                       | S10 |
| Characterization of electrode materials.....                   | S30 |
| Cyclic Voltammetry.....                                        | S32 |
| References.....                                                | S33 |
| Crystal data.....                                              | S35 |
| <sup>1</sup> H and <sup>13</sup> C NMR Spectra.....            | S53 |

## General remarks

Catalytic reactions were carried out in undivided electrochemical cells using pre-dried glassware under argon atmosphere, if not noted otherwise. The fluorinated carbon electrodes (15 mm × 10 mm × 0.2 mm, obtained from Sigracet® Fuel Cell Components) and platinum electrodes (15 mm × 10 mm × 0.125 mm, 99.9%, obtained from ChemPur® Karlsruhe, Germany) were connected using stainless steel adapters. Electrocatalysis was conducted using an AXIOMET AX-3003P potentiostat in constant current mode. Cyclic Voltammetry studies were performed using a Gamry 1010E interface workstation. Yields refer to isolated compounds, estimated to be >95% pure as determined by <sup>1</sup>H NMR. Chromatography: Spectrochem silica gel 60-200 mesh. NMR: Spectra were recorded on Bruker AV 400 and Bruker AV 500 in the solvent indicated; chemical shifts (δ) are given in ppm relative to the residual solvent peak. FT-IR was analyzed in Bruker ALPHA instrument and reported as cm<sup>-1</sup>. High-resolution (HRMS) mass spectral analyses were recorded by a Hybrid Quadrupole Orbitrap Mass Spectrometer coupled to the UHPLC system. The Field Emission Scanning Electron Microscope (FESEM) analysis was conducted utilizing the FEI Nova Nano SEM 450 FESEM microscope. Sample preparation for FESEM involved applying a thin coating of the isopropyl alcohol (IPA)-dispersed sample (5 mg of the sample in 5 mg IPA) onto a silicon wafer. Subsequently, the samples underwent a 30-minute drying process under an infrared (IR) lamp to eliminate the IPA. Elemental inspection was performed using Scanning Electron Microscopy with Energy Dispersive X-ray Spectroscopy (SEM-EDS) employing a Quanta 200 3D FEI instrument connected to the TEAMTM EDS analysis system.

## Starting materials:

For the substrate scope, alkenes **1a-1z** and **1a'** were either purchased from commercial sources or prepared by following the reported procedure: pent-4-en-1-yl benzoate (**1a**), 3-methylbut-3-en-1-yl benzoate (**1a'**), pent-4-en-1-yl acetate (**1b**), (pent-4-en-1-yloxy)methylbenzene (**1c**), allylbenzene (**1d**, CAS: 300-57-2), 1-allyl-2-methylbenzene (**1e**, CAS: 1587-04-8), 1-allyl-3-methylbenzene (**1f**, CAS: 3333-20-8), 1-allyl-4-methoxybenzene (**1g**, CAS: 140-67-0), 4-allyl-1,2-dimethoxybenzene (**1h**, CAS: 93-15-2), but-3-en-1-ylbenzene (**1i**, CAS: 768-56-9), 2-(oct-7-en-1-yl)oxirane (**1j**, CAS: 85721-25-1), (but-3-en-1-yloxy)(tert-butyl)dimethylsilane (**1k**), oct-1-ene (**1l**, CAS: 111-66-0), dec-1-ene (**1m**, CAS: 872-05-9), vinylcyclohexane (**1n**, CAS: 695-12-5), allylcyclohexane (**1o**, CAS: 2114-42-3), pent-4-en-1-yloxybenzene (**1p**), 1-ethyl-4-(pent-4-en-1-yloxy)benzene (**1q**), pent-4-en-1-yl(phenyl)sulfane (**1r**), ethyl undec-10-enoate (**1s**, CAS: 692-86-4), N,N-diisopropylundec-10-enamide (**1t**), 6-bromohex-1-ene (**1u**, CAS: 2695-47-8), 10-bromodec-1-ene (**1v**, CAS: 62871-09-4), (Z)-cyclooctene (**1w**, CAS: 931-87-3), styrene (**1x**, CAS: 100-42-5), 1H-indene (**1y**, CAS: 95-13-6), (E)-prop-1-en-1-ylbenzene (**1z**, CAS: 873-66-5), (3-methylbut-3-en-1-yl)benzene (**1i'**), 5,5-dimethylcyclohexane-1,3-dione (**2a**, CAS: 126-81-8), cyclohexane-1,3-dione (**2b**, CAS: 504-02-9), pentane 2,4-dione (**2c**, CAS: 123-54-6), heptane 3,5-dione (**2d**, CAS: 7424-54-6), ethyl 3-oxobutanoate (**2e**, CAS: 141-97-9).

## Preparation of starting materials

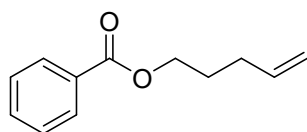

**Pent-4-en-1-yl benzoate (1a)** was prepared by following the literature procedure given by Miranda/Padrón and coworkers.<sup>1</sup>

**<sup>1</sup>H NMR (400 MHz, CDCl<sub>3</sub>)**  $\delta$  = 8.10 – 8.00 (m, 2H), 7.61 – 7.51 (m, 1H), 7.52 – 7.38 (m, 2H), 5.85 (ddt,  $J$  = 16.9, 10.2, 6.6 Hz, 1H), 5.12 – 4.98 (m, 2H), 4.34 (t,  $J$  = 6.6 Hz, 2H), 2.23 (ddd,  $J$  = 7.7, 6.8, 1.2 Hz, 2H), 1.93 – 1.83 (m, 2H).

**<sup>13</sup>C NMR (101 MHz, CDCl<sub>3</sub>)**  $\delta$  = 166.7 (C<sub>q</sub>), 137.6 (CH), 133.0 (CH), 130.6 (C<sub>q</sub>), 129.7 (CH), 128.5 (CH), 115.5 (CH<sub>2</sub>), 64.5 (CH<sub>2</sub>), 30.3 (CH<sub>2</sub>), 28.1 (CH<sub>2</sub>).

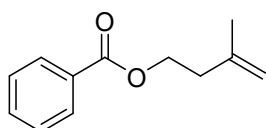

**3-Methylbut-3-en-1-yl benzoate (1a')** was prepared by following the literature procedure given by Xu/Loh and coworkers.<sup>2</sup>

**<sup>1</sup>H NMR (400 MHz, CDCl<sub>3</sub>)**  $\delta$  = 8.08 – 8.01 (m, 2H), 7.58 – 7.52 (m, 1H), 7.48 – 7.40 (m, 2H), 4.83 (d,  $J$  = 11.0 Hz, 2H), 4.44 (t,  $J$  = 6.8 Hz, 2H), 2.49 (t,  $J$  = 6.8 Hz, 2H), 1.82 (s, 3H).

**<sup>13</sup>C NMR (101 MHz, CDCl<sub>3</sub>)**  $\delta$  = 166.7 (C<sub>q</sub>), 141.9 (C<sub>q</sub>), 133.0 (CH), 130.5 (C<sub>q</sub>), 129.7 (CH), 128.5 (CH), 112.6 (CH<sub>2</sub>), 63.3 (CH<sub>2</sub>), 37.0 (CH<sub>2</sub>), 22.7 (CH<sub>3</sub>).

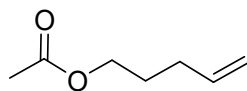

**Pent-4-en-1-yl acetate (1b)** was prepared by following the literature procedure given by Harrity and coworkers.<sup>3</sup>

**<sup>1</sup>H NMR (400 MHz, CDCl<sub>3</sub>)**  $\delta$  = 5.79 (ddt,  $J$  = 16.9, 10.2, 6.6 Hz, 1H), 5.07 – 4.95 (m, 2H), 4.06 (t,  $J$  = 6.7 Hz, 2H), 2.11 (dd,  $J$  = 14.8, 6.8 Hz, 2H), 2.04 (s, 3H), 1.72 (dt,  $J$  = 13.8, 6.8 Hz, 2H).

**<sup>13</sup>C NMR (101 MHz, CDCl<sub>3</sub>)**  $\delta$  = 171.3 (C<sub>q</sub>), 137.6 (CH), 115.4 (CH<sub>2</sub>), 64.0 (CH<sub>2</sub>), 30.2 (CH<sub>2</sub>), 27.9 (CH<sub>2</sub>), 21.1 (CH<sub>3</sub>).

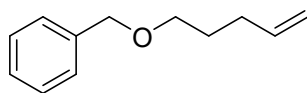

**(Pent-4-en-1-yloxy) methyl benzene (1c)** was prepared by following the literature procedure given by Berkowitz and coworkers.<sup>4</sup>

**<sup>1</sup>H NMR (400 MHz, CDCl<sub>3</sub>)**  $\delta$  = 7.40 – 7.37 (m, 4H), 7.36 – 7.29 (m, 1H), 5.88 (ddt,  $J$  = 16.9, 10.2, 6.7 Hz, 1H), 5.09 (ddd,  $J$  = 17.1, 3.3, 1.6 Hz, 1H), 5.03 (d,  $J$  = 10.2 Hz, 1H), 4.56 (s, 2H), 3.54 (t,  $J$  = 6.5 Hz, 2H), 2.22 (dd,  $J$  = 14.7, 6.9 Hz, 2H), 1.83 – 1.73 (m, 2H).

**<sup>13</sup>C NMR (101 MHz, CDCl<sub>3</sub>)**  $\delta$  = 138.7 (C<sub>q</sub>), 138.3 (CH), 128.4 (CH), 127.7 (CH), 127.6 (CH), 114.8 (CH<sub>2</sub>), 72.9 (CH<sub>2</sub>), 69.8 (CH<sub>2</sub>), 30.4 (CH<sub>2</sub>), 29.1 (CH<sub>2</sub>).

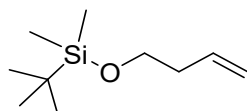

**(But-3-en-1-yloxy)(tert-butyl)dimethylsilane (1k)** was prepared by following the literature procedure given by Wu and coworkers.<sup>5</sup>

**<sup>1</sup>H NMR (400 MHz, CDCl<sub>3</sub>)**  $\delta$  = 5.82 (ddt,  $J$  = 17.1, 10.2, 6.9 Hz, 1H), 5.13 – 4.96 (m, 2H), 3.66 (t,  $J$  = 6.8 Hz, 2H), 2.28 (qt,  $J$  = 6.8, 1.3 Hz, 2H), 0.89 (s, 9H), 0.05 (s, 6H).

**<sup>13</sup>C NMR (101 MHz, CDCl<sub>3</sub>)**  $\delta$  = 135.6 (CH), 116.4 (CH<sub>2</sub>), 63.0 (CH<sub>2</sub>), 37.6 (CH<sub>2</sub>), 26.1 (CH<sub>3</sub>), 18.5 (C<sub>q</sub>), 5.1 (CH<sub>3</sub>).

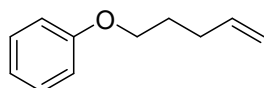

**(Pent-4-en-1-aryloxy) benzene. (1p)** was prepared by following the literature procedure given by Song and coworkers.<sup>6</sup>

**<sup>1</sup>H NMR (500 MHz, CDCl<sub>3</sub>)**  $\delta$  = 7.31 (dd,  $J$  = 7.9, 7.9 Hz, 2H), 7.00 – 6.90 (m, 3H), 5.89 (ddt,  $J$  = 16.9, 10.2, 6.7 Hz, 1H), 5.11 (d,  $J$  = 17.1 Hz, 1H), 5.04 (d,  $J$  = 10.2 Hz, 1H), 4.00 (t,  $J$  = 6.4 Hz, 2H), 2.30 – 2.25 (m, 2H), 1.95 – 1.90 (m, 2H).

**<sup>13</sup>C NMR (126 MHz, CDCl<sub>3</sub>)**  $\delta$  = 159.2 (C<sub>q</sub>), 138.0 (CH), 129.5 (CH), 120.7 (CH), 115.3 (CH<sub>2</sub>), 114.6 (CH), 67.1 (CH<sub>2</sub>), 30.3 (CH<sub>2</sub>), 28.6 (CH<sub>2</sub>).

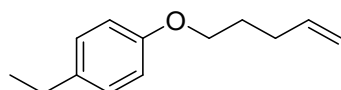

**1-Ethyl-4-(pent-4-en-1-yloxy) benzene (1q)** was prepared by following the literature procedure given by Wang and coworkers.<sup>7</sup>

**<sup>1</sup>H NMR (400 MHz, CDCl<sub>3</sub>)**  $\delta$  = 7.11 (d, J = 8.2 Hz, 2H), 6.83 (d, J = 8.4 Hz, 2H), 5.87 (ddt, J = 16.9, 10.2, 6.6 Hz, 1H), 5.07 (dd, J = 17.1, 1.2 Hz, 1H), 5.00 (dd, J = 10.2, 1.1 Hz, 1H), 3.96 (t, J = 6.4 Hz, 2H), 2.60 (q, J = 7.6 Hz, 2H), 2.25 (q, J = 7.1 Hz, 2H), 1.94 – 1.82 (m, 2H), 1.22 (t, J = 7.6 Hz, 3H).

**<sup>13</sup>C NMR (101 MHz, CDCl<sub>3</sub>)**  $\delta$  = 157.2 (C<sub>q</sub>), 138.1 (CH), 136.4 (C<sub>q</sub>), 128.8 (CH), 115.2 (CH<sub>2</sub>), 114.5 (CH), 67.4 (CH<sub>2</sub>), 30.3 (CH<sub>2</sub>), 28.7 (CH<sub>2</sub>), 28.1 (CH<sub>2</sub>), 16.0 (CH<sub>3</sub>).

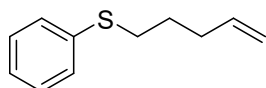

**Pent-4-en-1-yl (phenyl) sulfane. (1r)** was prepared by following the literature procedure given by Dussault and coworkers.<sup>8</sup>

**<sup>1</sup>H NMR (400 MHz, CDCl<sub>3</sub>)**  $\delta$  = 7.35 – 7.32 (m, 2H), 7.32 – 7.26 (m, 2H), 7.20 – 7.15 (m, 1H), 5.79 (ddt, J = 16.9, 10.2, 6.7 Hz, 1H), 5.10 – 4.97 (m, 2H), 2.96 – 2.89 (m, 2H), 2.21 (dd, J = 14.5, 6.9 Hz, 2H), 1.80 – 1.71 (m, 2H).

**<sup>13</sup>C NMR (101 MHz, CDCl<sub>3</sub>)**  $\delta$  = 137.7 (CH), 136.9 (C<sub>q</sub>), 129.2 (CH), 129.0 (CH), 125.9 (CH), 115.5 (CH<sub>2</sub>), 33.1 (CH<sub>2</sub>), 32.8 (CH<sub>2</sub>), 28.4 (CH<sub>2</sub>).

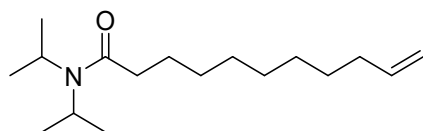

**N, N-Diisopropylundec-10-enamide (1t)** was prepared by following the literature procedure given by Coates and coworkers.<sup>9</sup>

**<sup>1</sup>H NMR (400 MHz, CDCl<sub>3</sub>)**  $\delta$  = 5.80 (ddt, J = 16.9, 10.2, 6.7 Hz, 1H), 4.98 (ddd, J = 17.1, 3.6, 1.6 Hz, 1H), 4.91 (ddt, J = 10.2, 2.2, 1.2 Hz, 1H), 3.95 (dt, J = 13.3, 6.6 Hz, 1H), 3.47 (bs, 1H), 2.30 – 2.20 (m, 2H), 2.06 – 1.96 (m, 2H), 1.58 (dd, J = 14.9, 7.3 Hz, 2H), 1.36 (d, J = 6.7 Hz, 6H), 1.29 (bs, 10H), 1.19 (d, J = 6.7 Hz, 6H).

**<sup>13</sup>C NMR (101 MHz, CDCl<sub>3</sub>)**  $\delta$  = 172.2 (C<sub>q</sub>), 139.4 (CH), 114.2 (CH<sub>2</sub>), 48.3 (CH), 45.6 (CH), 35.6 (CH<sub>2</sub>), 33.9 (CH<sub>2</sub>), 29.6 (CH<sub>2</sub>), 29.6 (CH<sub>2</sub>), 29.5 (CH<sub>2</sub>), 29.2 (CH<sub>2</sub>), 29.1 (CH<sub>2</sub>), 25.6 (CH<sub>2</sub>), 21.2 (CH<sub>3</sub>), 20.9 (CH<sub>3</sub>).

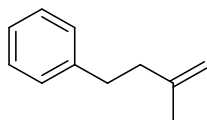

**(3-methylbut-3-en-1-yl)benzene (1i')** was prepared by following the literature procedure given by Carreira and coworkers.<sup>10</sup>

<sup>1</sup>H NMR (400 MHz, CDCl<sub>3</sub>)  $\delta$  = 7.34 – 7.27 (m, 2H), 7.25 – 7.17 (m, 3H), 4.76 (d, J = 10.5 Hz, 2H), 2.78 (dd, J = 9.4, 6.9 Hz, 2H), 2.42 – 2.30 (m, 2H), 1.80 (s, 3H).

<sup>13</sup>C NMR (101 MHz, CDCl<sub>3</sub>)  $\delta$  = 145.5 (C<sub>q</sub>), 142.4 (C<sub>q</sub>), 128.5 (CH), 128.4 (CH), 125.9 (CH), 110.4 (CH<sub>2</sub>), 39.8 (CH<sub>2</sub>), 34.4 (CH<sub>2</sub>), 22.8 (CH<sub>3</sub>).

### Preparation of Cobalt-Complex

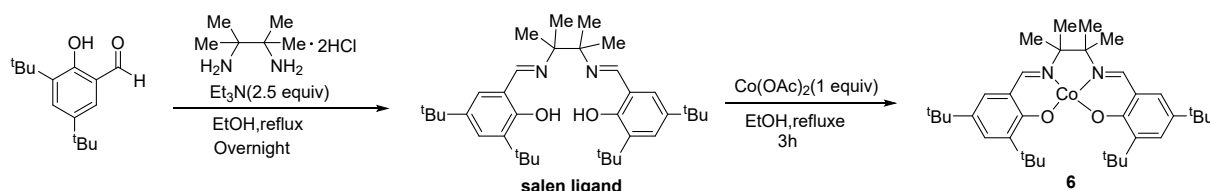

**6,6'-((1E,1'E)-((2,3-Dimethylbutane-2,3-diyl)bis(azaneylylidene))bis(methaneylylidene))bis(2,4-di-tert-butylphenol) (Salen ligand)** and **Cobalt-salen complex 6** were prepared by following the literature procedure given by Lin and coworkers.<sup>11</sup>

**(Salen Ligand)** <sup>1</sup>H NMR (400 MHz, CDCl<sub>3</sub>)  $\delta$  = 14.32 (s, 2H), 8.40 (s, 2H), 7.36 (d, J = 2.4 Hz, 2H), 7.10 (d, J = 2.4 Hz, 2H), 1.44 (s, 18H), 1.40 (s, 12H), 1.30 (s, 18H).

<sup>13</sup>C NMR (101 MHz, CDCl<sub>3</sub>)  $\delta$  = 162.8 (CH), 158.6 (C<sub>q</sub>), 139.9 (C<sub>q</sub>), 136.8 (C<sub>q</sub>), 126.9 (CH), 126.4 (CH), 118.1 (C<sub>q</sub>), 65.1 (C<sub>q</sub>), 35.2 (C<sub>q</sub>), 34.3 (C<sub>q</sub>), 31.7 (CH<sub>3</sub>), 29.6 (CH<sub>3</sub>), 23.4 (CH<sub>3</sub>).

**HRMS (ESI) (m/z):** calcd for C<sub>36</sub>H<sub>57</sub>N<sub>2</sub>O<sub>2</sub> [M+H]<sup>+</sup> + 549.4415 found 549.4413.

**FT-IR (cm<sup>-1</sup>):** 3686, 3020, 2403, 1623.1471, 1216, 1036, 928, 763.

### General procedure for electrochemical (3+2) cycloaddition (A)

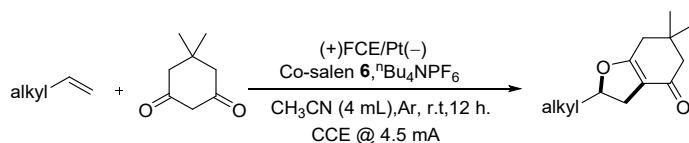

The electrochemical (3+2) cycloaddition was carried out in an undivided cell with a fluorinated carbon electrode (FCE) (15 x 10 x 0.2 mm) anode and Pt plate (15 x 10 x 0.125 mm) cathode. To a 10 mL pre-dried undivided electrochemical cell equipped with a magnetic bar were added 1,3-dione (0.80 mmol, 2.0 equiv), <sup>n</sup>Bu<sub>4</sub>NPF<sub>6</sub> (0.40 mmol, 1.0 equiv.), alkene (0.40 mmol, 1.0 equiv.) and Co-salen **6** catalyst (10 μmol, 0.025 equiv.) under argon atmosphere. Then CH<sub>3</sub>CN (4 mL) was added and the reaction mixture was stirred for five minutes before the electrolysis at a constant current of 4.5 mA for 12 h (5 F/mole). at room temperature. The reaction mixture was transferred to a separating funnel and H<sub>2</sub>O (15 mL) was added. The resulting mixture was extracted with EtOAc (15 mL × 3). The combined organic phase was dried over anhydrous Na<sub>2</sub>SO<sub>4</sub>, filtered, and concentrated under reduced pressure. The crude reaction mixture was purified by silica gel column chromatography using pet ether/EtOAc to furnish the desired product.

### Electrochemical reaction in 1 mmol scale

The electrochemical (3+2) cycloaddition was carried out in an undivided cell with a fluorinated carbon electrode (FCE) (25 x 10 x 0.2 mm) anode and Pt plate (25 x 10 x 0.125 mm) cathode. To a 25 mL pre-dried undivided electrochemical cell equipped with a magnetic bar were added 5,5-dimethylcyclohexane-1,3-dione **2a** (2.0 mmol, 2.0 equiv), <sup>n</sup>Bu<sub>4</sub>NPF<sub>6</sub> (1.0 mmol, 1.0 equiv.), but-3-en-1-ylbenzene **1i** (1.0 mmol, 1.0 equiv.) and Co-salen catalyst (25 μmol, 0.025 equiv.) under argon atmosphere. Then CH<sub>3</sub>CN (10 mL) was added and the reaction mixture was stirred for five minutes before the electrolysis at a constant current of 10.0 mA for 12 h. at room temperature. The reaction mixture was concentrated in a vacuum and the crude reaction mixture was purified by silica gel column chromatography using pet ether/EtOAc to furnish the desired product **3ia** (167.6 mg, 62% yield) as a colourless oil.



## Reaction Optimization for electrochemical (3+2) cycloaddition

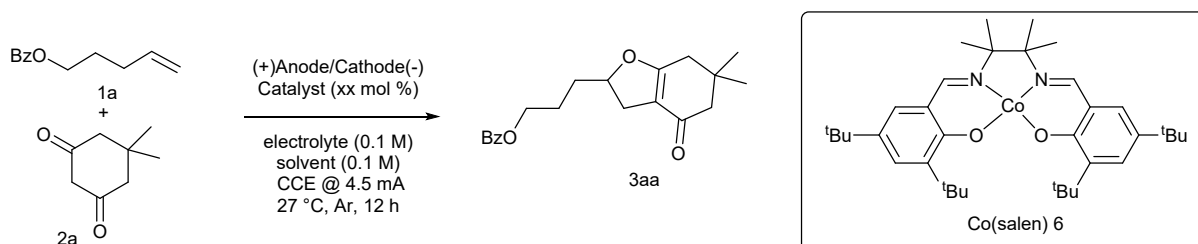

| Entry | Electrode/Mediator                                         | Solvent                   | Supporting Electrolyte                                | Yield 3aa (%) <sup>a</sup> |
|-------|------------------------------------------------------------|---------------------------|-------------------------------------------------------|----------------------------|
| 1     | glassy carbon/Pt                                           | CH <sub>3</sub> CN        | <sup>n</sup> Bu <sub>4</sub> NPF <sub>6</sub> (0.1 M) | 0                          |
| 2     | RVC/Pt                                                     | CH <sub>3</sub> CN        | <sup>n</sup> Bu <sub>4</sub> NPF <sub>6</sub> (0.1 M) | trace                      |
| 3     | graphite plate/Pt                                          | CH <sub>3</sub> CN        | <sup>n</sup> Bu <sub>4</sub> NPF <sub>6</sub> (0.1 M) | 15                         |
| 4     | graphite felt/Pt                                           | CH <sub>3</sub> CN        | <sup>n</sup> Bu <sub>4</sub> NPF <sub>6</sub> (0.1 M) | 19                         |
| 5     | carbon fiber/Pt                                            | CH <sub>3</sub> CN        | <sup>n</sup> Bu <sub>4</sub> NPF <sub>6</sub> (0.1 M) | 17                         |
| 6     | FCE/Pt                                                     | CH <sub>3</sub> CN        | <sup>n</sup> Bu <sub>4</sub> NPF <sub>6</sub> (0.1 M) | 58                         |
| 7     | FCE/Pt, ferrocene (2.5 / 5 / 10 mol %)                     | CH <sub>3</sub> CN        | <sup>n</sup> Bu <sub>4</sub> NPF <sub>6</sub> (0.1 M) | 58 / 45 / 13               |
| 8     | FCE/Pt, Tempo (2.5 / 5 mol %)                              | CH <sub>3</sub> CN        | <sup>n</sup> Bu <sub>4</sub> NPF <sub>6</sub> (0.1 M) | 22 / 39                    |
| 9     | FCE/Pt, <sup>n</sup> Bu <sub>4</sub> NI (2.5 / 5 mol %)    | CH <sub>3</sub> CN        | <sup>n</sup> Bu <sub>4</sub> NPF <sub>6</sub> (0.1 M) | 37 / 45                    |
| 10    | FCE/Pt, Co(salen) 6 (1.25 / 2.5 / 5 mol %)                 | CH <sub>3</sub> CN        | <sup>n</sup> Bu <sub>4</sub> NPF <sub>6</sub> (0.1 M) | 66 / 72 / 63               |
| 11    | FCE/Pt, Co(salen) (2.5 mol %) / NaOAc (0.5 equiv) / 4.5 mA | CH <sub>3</sub> CN        | <sup>n</sup> Bu <sub>4</sub> NPF <sub>6</sub> (0.1 M) | 40                         |
| 12    | FCE/Pt, Co(salen) (2.5 mol %) / 3 mA, 18 h                 | CH <sub>3</sub> CN        | <sup>n</sup> Bu <sub>4</sub> NPF <sub>6</sub> (0.1 M) | 59                         |
| 13    | FCE/Pt, Co(salen) (2.5 mol %) / 6 mA, 9 h                  | CH <sub>3</sub> CN        | <sup>n</sup> Bu <sub>4</sub> NPF <sub>6</sub> (0.1 M) | 65                         |
| 14    | FCE/Pt, Co(salen) (2.5 mol %)                              | CH <sub>3</sub> CN        | <sup>n</sup> Bu <sub>4</sub> NBF <sub>4</sub> (0.1 M) | 69                         |
| 15    | FCE/Pt, Co(salen) (2.5 mol %)                              | CH <sub>3</sub> CN        | <sup>n</sup> Bu <sub>4</sub> NI (0.1 M)               | 0                          |
| 16    | FCE/Pt, Co(salen) (2.5 mol %)                              | CH <sub>3</sub> CN        | LiClO <sub>4</sub> (0.1 M)                            | 56                         |
| 17    | FCE/Pt, Co(salen) (2.5 mol %)                              | DMF                       | <sup>n</sup> Bu <sub>4</sub> NPF <sub>6</sub> (0.1 M) | 66                         |
| 18    | FCE/Pt, Co(salen) (2.5 mol %)                              | DMA                       | <sup>n</sup> Bu <sub>4</sub> NPF <sub>6</sub> (0.1 M) | 71                         |
| 19    | FCE/Pt, Co(salen) (2.5 mol %)                              | CH <sub>3</sub> CN / HFIP | <sup>n</sup> Bu <sub>4</sub> NPF <sub>6</sub> (0.1 M) | 73                         |

### Characterization data for compounds:

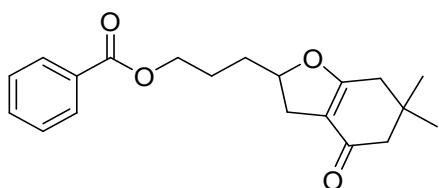

### 3-(6,6-Dimethyl-4-oxo-2,3,4,5,6,7-hexahydrobenzofuran-2-yl)propyl benzoate (**3aa**)

General procedure **A** was followed using pent-4-en-1-yl benzoate (**1a**) (76.1 mg, 0.40 mmol, 1.0 equiv.), 5,5-dimethyl cyclohexane-1,3-dione (**2a**) (112 mg, 0.80 mmol, 2.0 equiv.), Co-salen (**6**) (6.1 mg, 10  $\mu$ mol, 0.025 equiv.) and tetrabutylammonium hexafluorophosphate (155 mg, 0.40 mmol, 1.0 equiv.) in  $\text{CH}_3\text{CN}$  (4 mL) for 12 h. Purification by column chromatography using (pet ether/EtOAc =1:1) yielded **3aa** (94.6 mg, 72%) as a colourless oil.

**$^1\text{H}$  NMR (400 MHz,  $\text{CDCl}_3$ )**  $\delta$  = 8.01 (d,  $J$  = 7.4 Hz, 2H), 7.54 (dd,  $J$  = 7.5, 7.5 Hz, 1H), 7.42 (dd,  $J$  = 7.5, 7.5 Hz, 2H), 4.93 – 4.80 (m, 1H), 4.35 (d,  $J$  = 5.1 Hz, 2H), 2.98 – 2.88 (m, 1H), 2.48 (dd,  $J$  = 14.1, 7.0 Hz, 1H), 2.24 (s, 2H), 2.20 (s, 2H), 2.01 – 1.72 (m, 4H), 1.07 (s, 6H).

**$^{13}\text{C}$  NMR (101 MHz,  $\text{CDCl}_3$ )**  $\delta$  = 194.9 ( $\text{C}_q$ ), 176.2 ( $\text{C}_q$ ), 166.6 ( $\text{C}_q$ ), 133.1 (CH), 130.3 ( $\text{C}_q$ ), 129.6 (CH), 128.5 (CH), 111.5 ( $\text{C}_q$ ), 85.7 (CH), 64.4 ( $\text{CH}_2$ ), 51.0 ( $\text{CH}_2$ ), 37.9 ( $\text{CH}_2$ ), 34.1 ( $\text{C}_q$ ), 32.9 ( $\text{CH}_2$ ), 31.4 ( $\text{CH}_2$ ), 28.8 ( $\text{CH}_3$ ), 28.7 ( $\text{CH}_3$ ), 24.7 ( $\text{CH}_2$ ).

**HRMS (ESI) (m/z):** calcd for  $\text{C}_{20}\text{H}_{25}\text{O}_4$  [ $\text{M}+\text{H}$ ] $^+$  329.1747 found 329.1750.

**FT-IR ( $\text{cm}^{-1}$ ):** 3021, 2964, 1714, 1628, 1274, 1113, 931, 767.

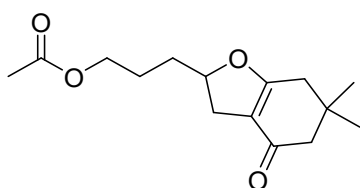

### 3-(6,6-Dimethyl-4-oxo-2,3,4,5,6,7-hexahydrobenzofuran-2-yl)propyl acetate (**3ba**)

General procedure **A** was followed using pent-4-en-1-yl acetate (**1b**) (51.3 mg, 0.40 mmol, 1.0 equiv.), 5,5-dimethyl cyclohexane-1,3-dione (**2a**) (112 mg, 0.80 mmol, 2.0 equiv.), Co-salen (**6**) (6.1 mg, 10  $\mu$ mol, 0.025 equiv.) and tetrabutylammonium hexafluorophosphate (155 mg, 0.40 mmol, 1.0 equiv.) in  $\text{CH}_3\text{CN}$  (4 mL) for 12 h. Purification by column chromatography using (pet ether /EtOAc =2:1) yielded **3ba** (71.4 mg, 67%) as a colourless oil.

**$^1\text{H}$  NMR (400 MHz,  $\text{CDCl}_3$ )**  $\delta$  = 4.86 – 4.71 (m, 1H), 4.10 – 4.00 (m, 2H), 2.98 – 2.84 (m, 1H), 2.43 (dd,  $J$  = 14.3, 7.2 Hz, 1H), 2.22 (s, 2H), 2.17 (s, 2H), 2.01 (s, 3H), 1.83 – 1.63 (m, 4H), 1.05 (s, 6H).

$^{13}\text{C}$  NMR (101 MHz,  $\text{CDCl}_3$ )  $\delta$  = 194.9 ( $\text{C}_q$ ), 176.2 ( $\text{C}_q$ ), 171.1 ( $\text{C}_q$ ), 111.4 ( $\text{C}_q$ ), 85.6 (CH), 63.9 ( $\text{CH}_2$ ), 50.9 ( $\text{CH}_2$ ), 37.9 ( $\text{CH}_2$ ), 34.1 ( $\text{C}_q$ ), 32.7 ( $\text{CH}_2$ ), 31.3 ( $\text{CH}_2$ ), 28.8 ( $\text{CH}_3$ ), 28.7 ( $\text{CH}_3$ ), 24.4 ( $\text{CH}_2$ ), 21.0 ( $\text{CH}_3$ ).

HRMS (ESI) (m/z): calcd for  $\text{C}_{15}\text{H}_{23}\text{O}_4$   $[\text{M}+\text{H}]^+$  267.1591 found 267.1591.

FT-IR ( $\text{cm}^{-1}$ ): 3021, 2927, 1726, 1630, 1216, 1036, 927, 759.

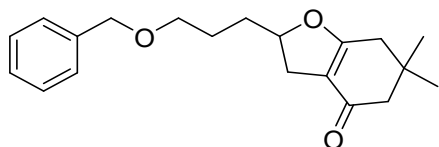

### 2-(3-(Benzyloxy)propyl)-6,6-dimethyl-3,5,6,7-tetrahydrobenzofuran-4(2H)-one (3ca)

General procedure A was followed using (pent-4-en-1-yloxy)methylbenzene (**1c**) (70.5mg, 0.40 mmol, 1.0 equiv.), 5, 5-dimethyl cyclohexane-1,3-dione (**2a**) (112 mg, 0.80 mmol, 2.0 equiv.), Co-salen (**6**) (6.1 mg, 10  $\mu\text{mol}$ , 0.025 equiv.) and tetrabutylammonium hexafluorophosphate (155 mg, 0.40 mmol, 1.0 equiv.) in  $\text{CH}_3\text{CN}$  (4 mL) for 12 h. Purification by column chromatography using (pet ether/EtOAc =2:1) yielded **3ca** (89.3 mg, 71%) as a colourless oil.

$^1\text{H}$  NMR (400 MHz,  $\text{CDCl}_3$ )  $\delta$  = 7.30 – 7.22 (m, 4H), 7.22 – 7.17 (m, 1H), 4.79 – 4.72 (m, 1H), 4.42 (s, 2H), 3.43 (t,  $J$  = 5.8 Hz, 2H), 2.83 (dd,  $J$  = 14.2, 10.0 Hz, 1H), 2.39 (ddt,  $J$  = 14.3, 7.3, 1.7 Hz, 1H), 2.17 (s, 2H), 2.13 (s, 2H), 1.84 – 1.54 (m, 4H), 1.01 (s, 3H), 1.00 (s, 3H).

$^{13}\text{C}$  NMR (101 MHz,  $\text{CDCl}_3$ )  $\delta$  = 194.9 ( $\text{C}_q$ ), 176.3 ( $\text{C}_q$ ), 138.4 ( $\text{C}_q$ ), 128.4 (CH), 127.6 (CH), 111.4 ( $\text{C}_q$ ), 86.1 (CH), 72.9 ( $\text{CH}_2$ ), 69.7 ( $\text{CH}_2$ ), 50.9 ( $\text{CH}_2$ ), 37.9 ( $\text{CH}_2$ ), 34.1 ( $\text{C}_q$ ), 33.0 ( $\text{CH}_2$ ), 31.2 ( $\text{CH}_2$ ), 28.8 ( $\text{CH}_3$ ), 28.7 ( $\text{CH}_3$ ), 25.4 ( $\text{CH}_2$ ). One carbon signal is missing due to the resonance of the signals.

HRMS (ESI) (m/z): calcd for  $\text{C}_{20}\text{H}_{27}\text{O}_3$   $[\text{M}+\text{H}]^+$  315.1955 found 315.1957.

FT-IR ( $\text{cm}^{-1}$ ): 3021, 2957, 1715, 1626, 1216, 1100, 928, 768.

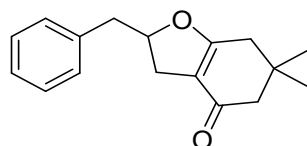

### 2-Benzyl-6,6-dimethyl-3,5,6,7-tetrahydrobenzofuran-4(2H)-one (3da)

General procedure A was followed using allylbenzene (**1d**) (47.3mg, 0.40 mmol, 1.0 equiv.), 5,5-dimethyl cyclohexane-1,3-dione (**2a**) (112 mg, 0.80 mmol, 2.0 equiv.), Co-salen (**6**) (6.1 mg, 10  $\mu\text{mol}$ , 0.025 equiv.) and tetrabutylammonium hexafluorophosphate (155 mg, 0.40 mmol, 1.0 equiv.) in  $\text{CH}_3\text{CN}$  (4 mL) for 12 h. Purification by column chromatography using (pet ether/EtOAc =2:1) yielded **3da** (68.7 mg, 67%) as a colourless oil.

**<sup>1</sup>H NMR (400 MHz, CDCl<sub>3</sub>)** δ = 7.31 – 7.29 (m, 2H), 7.25 – 7.19 (m, 3H), 5.09 – 5.01 (m, 1H), 3.01 (dd, J = 14.0, 6.5 Hz, 1H), 2.93 (dd, J = 14.0, 6.5 Hz, 1H), 2.90 – 2.82 (m, 1H), 2.59 (ddt, J = 14.0, 6.5, 1.6 Hz, 1H), 2.24 (s, 2H), 2.16 (d, J = 4.8 Hz, 2H), 1.06 (s, 3H), 1.01 (s, 3H).

**<sup>13</sup>C NMR (101 MHz, CDCl<sub>3</sub>)** δ = 194.8 (C<sub>q</sub>), 176.2 (C<sub>q</sub>), 136.4 (C<sub>q</sub>), 129.5 (CH), 128.6 (CH), 126.9 (CH), 111.5 (C<sub>q</sub>), 86.1 (CH), 50.9 (CH<sub>2</sub>), 42.0 (CH<sub>2</sub>), 37.9 (CH<sub>2</sub>), 34.1 (C<sub>q</sub>), 30.7 (CH<sub>2</sub>), 28.9 (CH<sub>3</sub>), 28.6 (CH<sub>3</sub>).

**HRMS (ESI) (m/z):** calcd for C<sub>17</sub>H<sub>21</sub>O<sub>2</sub> [M+H]<sup>+</sup> 257.1536 found 257.1538.

**FT-IR (cm<sup>-1</sup>):** 3019, 2960, 1628, 1510, 1217, 1101, 927, 769.

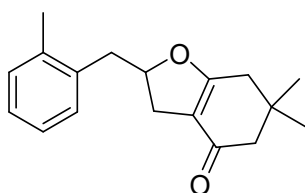

#### 6,6-Dimethyl-2-(2-methylbenzyl)-3,5,6,7-tetrahydrobenzofuran-4(2H)-one (3ea)

General procedure A was followed using 1-allyl-2-methylbenzene (**1e**) (52.9 mg, 0.40 mmol, 1.0 equiv.), 5,5-dimethyl cyclohexane-1,3-dione (**2a**) (112 mg, 0.80 mmol, 2.0 equiv.), Co-salen (**6**) (6.1 mg, 10 μmol, 0.025 equiv.) and tetrabutylammonium hexafluorophosphate (155 mg, 0.40 mmol, 1.0 equiv.) in CH<sub>3</sub>CN (4 mL) for 12 h. Purification by column chromatography using (pet ether/EtOAc =2:1) yielded **3ea** (64.9 mg, 60%) as a colourless oil.

**<sup>1</sup>H NMR (400 MHz, CDCl<sub>3</sub>)** δ = 7.16 – 7.15 (m, 4H), 5.23 – 4.99 (m, 1H), 3.08 (dd, J = 14.4, 7.4 Hz, 1H), 2.96 – 2.84 (m, 2H), 2.62 (ddd, J = 14.4, 8.2, 4.5 Hz, 1H), 2.32 (s, 3H), 2.26 (s, 2H), 2.21 (s, 2H), 1.08 (s, 3H), 1.07 (s, 3H).

**<sup>13</sup>C NMR (101 MHz, CDCl<sub>3</sub>)** δ = 194.9 (C<sub>q</sub>), 176.1 (C<sub>q</sub>), 136.5 (C<sub>q</sub>), 135.0 (C<sub>q</sub>), 130.5 (CH), 129.9 (CH), 127.0 (CH), 126.1 (CH), 111.5 (C<sub>q</sub>), 85.7 (CH), 51.0 (CH<sub>2</sub>), 39.3 (CH<sub>2</sub>), 37.9 (CH<sub>2</sub>), 34.2 (C<sub>q</sub>), 31.1 (CH<sub>2</sub>), 28.8 (CH<sub>3</sub>), 28.7 (CH<sub>3</sub>), 19.8 (CH<sub>3</sub>).

**HRMS (ESI) (m/z):** calcd for C<sub>18</sub>H<sub>23</sub>O<sub>2</sub> [M+H]<sup>+</sup> 271.1693 found 271.1695.

**FT-IR (cm<sup>-1</sup>):** 3019, 2965, 1627, 1521, 1217, 1104, 928, 758.

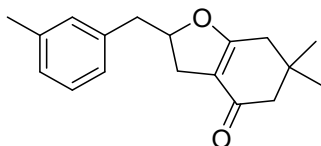

#### 6,6-Dimethyl-2-(3-methylbenzyl)-3,5,6,7-tetrahydrobenzofuran-4(2H)-one (3fa)

General procedure A was followed using 1-allyl-3-methylbenzene (**1f**) (52.9 mg, 0.40 mmol, 1.0 equiv.), 5,5-dimethyl cyclohexane-1,3-dione (**2a**) (112 mg, 0.80 mmol, 2.0 equiv.), Co-salen (**6**) (6.1 mg, 10 μmol, 0.025 equiv.) and tetrabutylammonium hexafluorophosphate (155 mg, 0.40 mmol,

1.0 equiv.) in CH<sub>3</sub>CN (4 mL) for 12 h. Purification by column chromatography using (pet ether/EtOAc =4:1) yielded **3fa** (58.4 mg, 54%) as a colourless oil.

**<sup>1</sup>H NMR (400 MHz, CDCl<sub>3</sub>)** δ = 7.18 (dd, J = 7.4, 7.4 Hz, 1H), 7.05 – 7.00 (m, 3H), 5.09 – 5.01 (m, 1H), 3.00 (dd, J = 13.9, 6.5 Hz, 1H), 2.92 – 2.83 (m, 2H), 2.59 (dd, J = 14.4, 7.0 Hz, 1H), 2.33 (s, 3H), 2.26 (s, 2H), 2.18 (d, J = 4.1 Hz, 2H), 1.08 (s, 3H), 1.04 (s, 3H).

**<sup>13</sup>C NMR (101 MHz, CDCl<sub>3</sub>)** δ = 194.9 (C<sub>q</sub>), 176.2 (C<sub>q</sub>), 138.2 (C<sub>q</sub>), 136.4 (C<sub>q</sub>), 130.3 (CH), 128.5 (CH), 127.7 (CH), 126.5 (CH), 111.6 (C<sub>q</sub>), 86.3 (CH), 51.0 (CH<sub>2</sub>), 42.0 (CH<sub>2</sub>), 38.0 (CH<sub>2</sub>), 34.2 (C<sub>q</sub>), 30.7 (CH<sub>2</sub>), 28.9 (CH<sub>3</sub>), 28.6 (CH<sub>3</sub>), 21.5 (CH<sub>3</sub>).

**HRMS (ESI) (m/z):** calcd for C<sub>18</sub>H<sub>23</sub>O<sub>2</sub> [M+H]<sup>+</sup> 271.1693 found 271.1695.

**FT-IR (cm<sup>-1</sup>):** 3020, 2964, 1625, 1523, 1216, 1101, 928, 761.

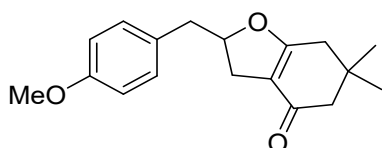

### 2-(4-Methoxybenzyl)-6,6-dimethyl-3,5,6,7-tetrahydrobenzofuran-4(2H)-one (**3ga**)

General procedure **A** was followed using 1-allyl-4-methoxybenzene (**1g**) (59.3 mg, 0.40 mmol, 1.0 equiv.), 5,5-dimethylcyclohexane-1,3-dione (**2a**) (112 mg, 0.80 mmol, 2.0 equiv.), Co-salen (**6**) (6.1 mg, 10 μmol, 0.025 equiv.) and tetrabutylammonium hexafluorophosphate (155 mg, 0.40 mmol, 1.0 equiv.) in CH<sub>3</sub>CN (4 mL) for 12 h. Purification by column chromatography using (pet ether/EtOAc =2:1) yielded **3ga** (74.5 mg, 65%) as a colourless oil.

**<sup>1</sup>H NMR (400 MHz, CDCl<sub>3</sub>)** δ = 7.12 (d, J = 8.5 Hz, 2H), 6.83 (d, J = 8.6 Hz, 2H), 5.05 – 4.98 (m, 1H), 3.78 (s, 3H), 2.95 (dd, J = 14.1, 6.4 Hz, 1H), 2.91 – 2.82 (m, 2H), 2.58 (dd, J = 14.4, 7.0 Hz, 1H), 2.24 (d, J = 1.1 Hz, 2H), 2.17 (d, J = 4.4 Hz, 2H), 1.07 (s, 3H), 1.02 (s, 3H).

**<sup>13</sup>C NMR (101 MHz, CDCl<sub>3</sub>)** δ = 194.9 (C<sub>q</sub>), 176.3 (C<sub>q</sub>), 158.6 (C<sub>q</sub>), 130.5 (CH), 128.4 (C<sub>q</sub>), 114.1 (CH), 111.6 (C<sub>q</sub>), 86.4 (CH), 55.4 (CH<sub>3</sub>), 51.0 (CH<sub>2</sub>), 41.2 (CH<sub>2</sub>), 37.9 (CH<sub>2</sub>), 34.2 (C<sub>q</sub>), 30.6 (CH<sub>2</sub>), 28.9 (CH<sub>3</sub>), 28.7 (CH<sub>3</sub>).

**HRMS (ESI) (m/z):** calcd for C<sub>18</sub>H<sub>23</sub>O<sub>3</sub> [M+H]<sup>+</sup> 287.1642 found 287.1643.

**FT-IR (cm<sup>-1</sup>):** 3019, 2960, 1626, 1514, 1218, 1102, 928, 762.

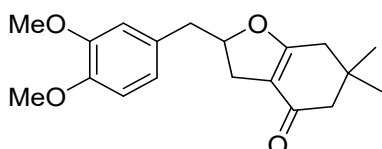

### 2-(3,4-Dimethoxybenzyl)-6,6-dimethyl-3,5,6,7-tetrahydrobenzofuran-4(2H)-one (**3ha**)

General procedure **A** was followed using 4-allyl-1,2-dimethoxybenzene (**1h**) (71.3 mg, 0.40 mmol, 1.0 equiv.), 5,5-dimethyl cyclohexane-1,3-dione (**2a**) (112 mg, 0.80 mmol, 2.0 equiv.), Co-salen (**6**) (6.1

mg, 10  $\mu$ mol, 0.025 equiv.) and tetrabutylammonium hexafluorophosphate (155 mg, 0.40 mmol, 1.0 equiv.) in  $\text{CH}_3\text{CN}$  (4 mL) for 12 h. Purification by column chromatography using (pet ether/EtOAc =1:1) yielded **3ha** (75.9 mg, 60%) as a colourless oil.

**$^1\text{H}$  NMR (400 MHz,  $\text{CDCl}_3$ )**  $\delta$  = 6.80 – 6.76 (m, 1H), 6.76 – 6.69 (m, 2H), 5.06 – 4.99 (m, 1H), 3.85 (s, 3H), 3.84 (s, 3H), 2.95 (dd,  $J$  = 14.1, 6.4 Hz, 1H), 2.91 – 2.78 (m, 2H), 2.58 (dd,  $J$  = 14.4, 7.1 Hz, 1H), 2.27 – 2.21 (m, 2H), 2.17 (d,  $J$  = 4.0 Hz, 2H), 1.06 (s, 3H), 1.02 (s, 3H).

**$^{13}\text{C}$  NMR (101 MHz,  $\text{CDCl}_3$ )**  $\delta$  = 194.9 ( $\text{C}_q$ ), 176.2 ( $\text{C}_q$ ), 149.0 ( $\text{C}_q$ ), 148.1 ( $\text{C}_q$ ), 128.9 ( $\text{C}_q$ ), 121.6 (CH), 112.7 (CH), 111.6 ( $\text{C}_q$ ), 111.4 (CH), 86.3 (CH), 56.0 ( $\text{CH}_3$ ), 56.0 ( $\text{CH}_3$ ), 50.9 ( $\text{CH}_2$ ), 41.6 ( $\text{CH}_2$ ), 38.0 ( $\text{CH}_2$ ), 34.1 ( $\text{C}_q$ ), 30.6 ( $\text{CH}_2$ ), 28.9 ( $\text{CH}_3$ ), 28.6 ( $\text{CH}_3$ ).

**HRMS (ESI) (m/z):** calcd for  $\text{C}_{19}\text{H}_{25}\text{O}_4$  [ $\text{M}+\text{H}$ ] $^+$  317.1747 found 317.1750.

**FT-IR ( $\text{cm}^{-1}$ ):** 3020, 2962, 1627, 1517, 1218, 1151, 927, 765.

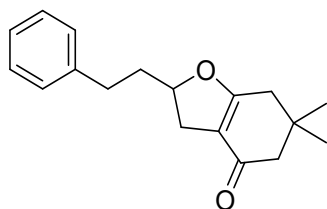

#### **6,6-Dimethyl-2-phenethyl-3,5,6,7-tetrahydrobenzofuran-4(2H)-one (3ia)**

General procedure A was followed using but-3-en-1-ylbenzene (**1i**) (52.9 mg, 0.40 mmol, 1.0 equiv.), 5,5-dimethyl cyclohexane-1,3-dione (**2a**) (112 mg, 0.80 mmol, 2.0 equiv.), Co-salen (**6**) (6.1 mg, 10  $\mu$ mol, 0.025 equiv.) and tetrabutylammonium hexafluorophosphate (155 mg, 0.40 mmol, 1.0 equiv.) in  $\text{CH}_3\text{CN}$  (4 mL) for 12 h. Purification by column chromatography using (pet ether/EtOAc =2:1) yielded **3ia** (71.4 mg, 66%) as a colourless oil.

**$^1\text{H}$  NMR (500 MHz,  $\text{CDCl}_3$ )**  $\delta$  = 7.34 – 7.28 (m, 2H), 7.24–7.21 (m, 3H), 4.86 – 4.79 (m, 1H), 2.95 (dd,  $J$  = 14.2, 10.0 Hz, 1H), 2.84 – 2.70 (m, 2H), 2.54 (dd,  $J$  = 14.3, 7.3 Hz, 1H), 2.30 (s, 2H), 2.24 (s, 2H), 2.13 – 2.04 (m, 1H), 2.01 – 1.92 (m, 1H), 1.12 (s, 6H).

**$^{13}\text{C}$  NMR (126 MHz,  $\text{CDCl}_3$ )**  $\delta$  = 195.0 ( $\text{C}_q$ ), 176.4 ( $\text{C}_q$ ), 141.0 ( $\text{C}_q$ ), 128.6 (CH), 128.5 (CH), 126.2 (CH), 111.5 ( $\text{C}_q$ ), 85.3 (CH), 51.0 ( $\text{CH}_2$ ), 37.9 ( $\text{CH}_2$ ), 37.9 ( $\text{CH}_2$ ), 34.2 ( $\text{C}_q$ ), 31.4 ( $\text{CH}_2$ ), 31.2 ( $\text{CH}_2$ ), 28.8 ( $\text{CH}_3$ ), 28.8 ( $\text{CH}_3$ ).

**HRMS (ESI) (m/z):** calcd for  $\text{C}_{18}\text{H}_{23}\text{O}_2$  [ $\text{M}+\text{H}$ ] $^+$  271.1693 found 271.1689.

**FT-IR ( $\text{cm}^{-1}$ ):** 3014, 2957, 1716, 1629, 1220, 1102, 920, 756.

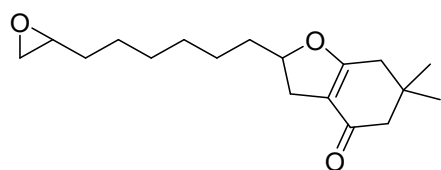

#### **6,6-Dimethyl-2-(6-(oxiran-2-yl)hexyl)-3,5,6,7-tetrahydrobenzofuran-4(2H)-one (3ja)**

General procedure **A** was followed using 2-(oct-7-en-1-yl) oxirane (**1j**) (61.7 mg, 0.40 mmol, 1.0 equiv.), 5,5-dimethyl cyclohexane-1,3-dione (**2a**) (112 mg, 0.80 mmol, 2.0 equiv.), Co-salen (**6**) (6.1 mg, 10  $\mu$ mol, 0.025 equiv.) and tetrabutylammonium hexafluorophosphate (155 mg, 0.40 mmol, 1.0 equiv.) in CH<sub>3</sub>CN (4 mL) for 12 h. Purification by column chromatography using (pet ether/EtOAc =2:1) yielded **3ja** (77.2 mg, 66%) as a colourless oil.

**<sup>1</sup>H NMR (400 MHz, CDCl<sub>3</sub>)**  $\delta$  = 4.78 (ddd, *J* = 13.2, 9.9, 7.2 Hz, 1H), 2.92 – 2.83 (m, 2H), 2.74 – 2.69 (m, 1H), 2.47 – 2.39 (m, 2H), 2.24 (s, 2H), 2.19 (s, 2H), 1.70 (ddd, *J* = 13.3, 8.2, 5.9 Hz, 1H), 1.65 – 1.56 (m, 1H), 1.55 – 1.27 (m, 10H), 1.07 (s, 3H), 1.07 (s, 3H).

**<sup>13</sup>C NMR (101 MHz, CDCl<sub>3</sub>)**  $\delta$  = 195.0 (C<sub>q</sub>), 176.4 (C<sub>q</sub>), 111.5 (C<sub>q</sub>), 86.4 (CH), 52.4 (CH), 51.0 (CH<sub>2</sub>), 47.2 (CH<sub>2</sub>), 38.0 (CH<sub>2</sub>), 36.2 (CH<sub>2</sub>), 34.1 (C<sub>q</sub>), 32.5 (CH<sub>2</sub>), 31.3 (CH<sub>2</sub>), 29.4 (CH<sub>2</sub>), 28.9 (CH<sub>3</sub>), 28.7 (CH<sub>3</sub>), 26.0 (CH<sub>2</sub>), 24.9 (CH<sub>2</sub>). One carbon signal is missing due to the resonance of the signals.

**HRMS (ESI) (m/z):** calcd for C<sub>18</sub>H<sub>29</sub>O<sub>3</sub> [M+H]<sup>+</sup> 293.2111 found 293.2113.

**FT-IR (cm<sup>-1</sup>):** 3018, 2962, 1745, 1624, 1296, 1143, 926, 770.

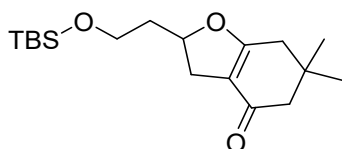

**2-{2-[(tert-Butyldimethylsilyl)oxy]ethyl}-6,6-dimethyl-3,5,6,7-tetrahydrobenzofuran-4(2H)-one (3ka)**

General procedure **A** was followed using (but-3-en-1-yloxy) (*tert*-butyl) dimethyl silane (**1k**) (74.5 mg, 0.40 mmol, 1.0 equiv.), 5,5-dimethyl cyclohexane-1,3-dione (**2a**) (112 mg, 0.80 mmol, 2.0 equiv.), Co-salen (**6**) (6.1 mg, 10  $\mu$ mol, 0.025 equiv.) and tetrabutylammonium hexafluorophosphate (155 mg, 0.40 mmol, 1.0 equiv.) in CH<sub>3</sub>CN (4 mL) for 12h. Purification by column chromatography using (pet ether/EtOAc =2:1) yielded **3ka** (70.1 mg, 54%) as a colourless oil.

**<sup>1</sup>H NMR (400 MHz, CDCl<sub>3</sub>)**  $\delta$  = 5.00 – 4.91 (m, 1H), 3.78 – 3.67 (m, 2H), 2.92 (dd, *J* = 14.2, 10.0 Hz, 1H), 2.47 (dd, *J* = 14.2, 7.3 Hz, 1H), 2.24 (d, *J* = 1.6 Hz, 2H), 2.20 (s, 2H), 1.98 – 1.89 (m, 1H), 1.84 – 1.73 (m, 1H), 1.08 (s, 3H), 1.07 (s, 3H), 0.87 (s, 9H), 0.04 (s, 3H), 0.04 (s, 3H).

**<sup>13</sup>C NMR (101 MHz, CDCl<sub>3</sub>)**  $\delta$  = 195.0 (C<sub>q</sub>), 176.3 (C<sub>q</sub>), 111.5 (C<sub>q</sub>), 83.3 (CH), 59.2 (CH<sub>2</sub>), 51.0 (CH<sub>2</sub>), 39.4 (CH<sub>2</sub>), 38.0 (CH<sub>2</sub>), 34.2 (C<sub>q</sub>), 31.4 (CH<sub>2</sub>), 28.9 (CH<sub>3</sub>), 28.8 (CH<sub>3</sub>), 26.0 (CH<sub>3</sub>), 18.4 (C<sub>q</sub>), -5.3 (Si-CH<sub>3</sub>).

**<sup>29</sup>Si NMR (79 MHz, CDCl<sub>3</sub>)**  $\delta$  = 19.6.

**HRMS (ESI) (m/z):** calcd for C<sub>18</sub>H<sub>33</sub>O<sub>3</sub>Si [M+H]<sup>+</sup> 325.2193 found 325.2190.

**FT-IR (cm<sup>-1</sup>):** 3018, 2955, 1627, 1521, 1217, 1101, 926, 768.

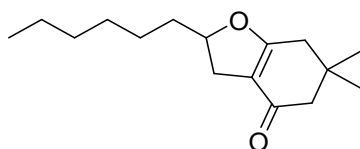

### 2-Hexyl-6,6-dimethyl-3,5,6,7-tetrahydrobenzofuran-4(2H)-one (**3la**)

General procedure **A** was followed using oct-1-ene (**1l**) (44.9 mg, 0.40 mmol, 1.0 equiv.), 5,5-dimethylcyclohexane-1,3-dione (**2a**) (112 mg, 0.80 mmol, 2.0 equiv.), Co-salen (**6**) (6.1 mg, 10  $\mu$ mol, 0.025 equiv.) and tetrabutylammonium hexafluorophosphate (155 mg, 0.40 mmol, 1.0 equiv.) in  $\text{CH}_3\text{CN}$  (4 mL) for 12 h. Purification by column chromatography using (pet ether/EtOAc =2:1) yielded **3la** (58.1 mg, 58%) as a colourless oil.

$^1\text{H NMR}$  (400 MHz,  $\text{CDCl}_3$ )  $\delta$  = 4.83 – 4.75 (m, 1H), 2.93 – 2.84 (m, 1H), 2.45 (dd,  $J$  = 14.2, 7.3 Hz, 1H), 2.24 (s, 2H), 2.20 (s, 2H), 1.73 – 1.68 (m, 1H), 1.66 – 1.55 (m, 1H), 1.49 – 1.16 (m, 8H), 1.08 (s, 6H), 0.87 (t,  $J$  = 5.9 Hz, 3H).

$^{13}\text{C NMR}$  (101 MHz,  $\text{CDCl}_3$ )  $\delta$  = 195.0 ( $\text{C}_q$ ), 176.4 ( $\text{C}_q$ ), 111.6 ( $\text{C}_q$ ), 86.5 (CH), 51.0 ( $\text{CH}_2$ ), 38.0 ( $\text{CH}_2$ ), 36.3 ( $\text{CH}_2$ ), 34.2 ( $\text{C}_q$ ), 31.8 ( $\text{CH}_2$ ), 31.3 ( $\text{CH}_2$ ), 29.1 ( $\text{CH}_2$ ), 28.9 ( $\text{CH}_3$ ), 28.7 ( $\text{CH}_3$ ), 25.0 ( $\text{CH}_2$ ), 22.7 ( $\text{CH}_2$ ), 14.2 ( $\text{CH}_3$ ).

**HRMS (ESI) (m/z)**: calcd for  $\text{C}_{16}\text{H}_{27}\text{O}_2$   $[\text{M}+\text{H}]^+$  251.2006 found 251.2007.

**FT-IR (cm $^{-1}$ )**: 3021, 2960, 1624, 1522, 1216, 1039, 927, 771.

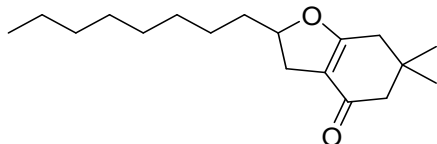

### 6,6-Dimethyl-2-octyl-3,5,6,7-tetrahydrobenzofuran-4(2H)-one (**3ma**)

General procedure **A** was followed using dec-1-ene (**1m**) (56.1 mg, 0.40 mmol, 1.0 equiv.), 5,5-dimethylcyclohexane-1,3-dione (**2a**) (112 mg, 0.80 mmol, 2.0 equiv.), Co-salen (**6**) (6.1 mg, 10  $\mu$ mol, 0.025 equiv.) and tetrabutylammonium hexafluorophosphate (155 mg, 0.40 mmol, 1.0 equiv.) in  $\text{CH}_3\text{CN}$  (4 mL) for 12 h. Purification by column chromatography using (pet ether/EtOAc =2:1) yielded **3ma** (69.1 mg, 62%) as a colourless oil.

$^1\text{H NMR}$  (400 MHz,  $\text{CDCl}_3$ )  $\delta$  = 4.83 – 4.74 (m, 1H), 2.87 (dd,  $J$  = 14.2, 9.9 Hz, 1H), 2.43 (dd,  $J$  = 14.2, 7.4 Hz, 1H), 2.23 (s, 2H), 2.19 (s, 2H), 1.79 – 1.66 (m, 1H), 1.64 – 1.54 (m, 1H), 1.46 – 1.15 (m, 12H), 1.07 (s, 3H), 1.06 (s, 3H), 0.85 (t,  $J$  = 6.9 Hz, 3H).

$^{13}\text{C NMR}$  (101 MHz,  $\text{CDCl}_3$ )  $\delta$  = 194.9 ( $\text{C}_q$ ), 176.4 ( $\text{C}_q$ ), 111.5 ( $\text{C}_q$ ), 86.5 (CH), 51.0 ( $\text{CH}_2$ ), 38.0 ( $\text{CH}_2$ ), 36.2 ( $\text{CH}_2$ ), 34.1 ( $\text{C}_q$ ), 31.9 ( $\text{CH}_2$ ), 31.2 ( $\text{CH}_2$ ), 29.5 ( $\text{CH}_2$ ), 29.5 ( $\text{CH}_2$ ), 29.3 ( $\text{CH}_2$ ), 28.9 ( $\text{CH}_3$ ), 28.7 ( $\text{CH}_3$ ), 25.0 ( $\text{CH}_2$ ), 22.7 ( $\text{CH}_2$ ), 14.2 ( $\text{CH}_3$ ).

**HRMS (ESI) (m/z)**: calcd for  $\text{C}_{18}\text{H}_{31}\text{O}_2$   $[\text{M}+\text{H}]^+$  279.2319 found 279.2320.

**FT-IR (cm $^{-1}$ )**: 3018, 2931, 1625, 1521, 1217, 1155, 926, 770.



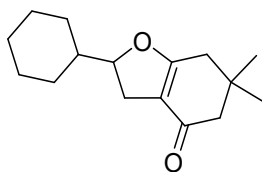

### 2-Cyclohexyl-6,6-dimethyl-3,5,6,7-tetrahydrobenzofuran-4(2H)-one (**3na**)

General procedure **A** was followed using vinylcyclohexane (**1n**) (44.1 mg, 0.40 mmol, 1.0 equiv.), 5,5-dimethyl cyclohexane-1,3-dione (**2a**) (112 mg, 0.80 mmol, 2.0 equiv.), Co-salen (**6**) (6.1 mg, 10  $\mu$ mol, 0.025 equiv.) and tetrabutylammonium hexafluorophosphate (155 mg, 0.40 mmol, 1.0 equiv.) in CH<sub>3</sub>CN (4 mL) for 12 h. Purification by column chromatography using (pet ether/EtOAc =4:1) yielded **3na** (55.6 mg, 56%) as a colourless oil.

**<sup>1</sup>H NMR (400 MHz, CDCl<sub>3</sub>)**  $\delta$  = 4.59 – 4.53 (m, 1H), 2.82 – 2.75 (m, 1H), 2.56 (dd, *J* = 14.3, 8.0 Hz, 1H), 2.26 (d, *J* = 1.5 Hz, 2H), 2.20 (d, *J* = 4.9 Hz, 2H), 1.83 (d, *J* = 12.8 Hz, 1H), 1.79 – 1.51 (m, 5H), 1.32 – 1.12 (m, 3H), 1.09 (s, 3H), 1.07 (s, 3H), 1.05 – 0.93 (m, 2H).

**<sup>13</sup>C NMR (101 MHz, CDCl<sub>3</sub>)**  $\delta$  = 194.9 (C<sub>q</sub>), 176.7 (C<sub>q</sub>), 111.8 (C<sub>q</sub>), 90.6 (CH), 51.0 (CH<sub>2</sub>), 43.1 (CH), 37.9 (CH<sub>2</sub>), 34.2 (C<sub>q</sub>), 29.0 (CH<sub>3</sub>), 28.8 (CH<sub>2</sub>), 28.6 (CH<sub>3</sub>), 28.1 (CH<sub>2</sub>), 28.0 (CH<sub>2</sub>), 26.5 (CH<sub>2</sub>), 25.9 (CH<sub>2</sub>), 25.8 (CH<sub>2</sub>).

**HRMS (ESI) (m/z):** calcd for C<sub>16</sub>H<sub>25</sub>O<sub>2</sub> [M+H]<sup>+</sup> 249.1849 found 249.1851.

**FT-IR (cm<sup>-1</sup>):** 3020, 2932, 1624, 1521, 1217, 1098, 931, 761.

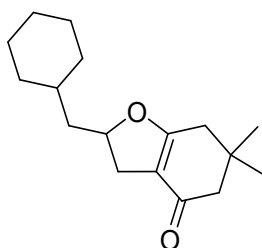

### 2-(Cyclohexylmethyl)-6,6-dimethyl-3,5,6,7-tetrahydrobenzofuran-4(2H)-one (**3oa**)

General procedure **A** was followed using allylcyclohexane (**1o**) (49.7 mg, 0.40 mmol, 1.0 equiv.), 5,5-dimethyl cyclohexane-1,3-dione (**2a**) (112 mg, 0.80 mmol, 2.0 equiv.), Co-salen (**6**) (6.1 mg, 10  $\mu$ mol, 0.025 equiv.) and tetrabutylammonium hexafluorophosphate (155 mg, 0.40 mmol, 1.0 equiv.) in CH<sub>3</sub>CN (4 mL) for 12 h. Purification by column chromatography using (pet ether/EtOAc =2:1) yielded **3oa** (61.9 mg, 59%) as a colourless oil.

**<sup>1</sup>H NMR (400 MHz, CDCl<sub>3</sub>)**  $\delta$  = 4.93 – 4.85 (m, 1H), 2.89 (dd, *J* = 14.1, 9.8 Hz, 1H), 2.41 (dd, *J* = 14.2, 7.5 Hz, 1H), 2.24 (s, 2H), 2.19 (s, 2H), 1.77 (d, *J* = 11.2 Hz, 1H), 1.73 – 1.58 (m, 5H), 1.51 – 1.38 (m, 2H), 1.30 – 1.11 (m, 3H), 1.07 (s, 3H), 1.07 (s, 3H), 1.02 – 0.85 (m, 2H).

**<sup>13</sup>C NMR (101 MHz, CDCl<sub>3</sub>)**  $\delta$  = 195.0 (C<sub>q</sub>), 176.4 (C<sub>q</sub>), 111.5 (C<sub>q</sub>), 84.6 (CH), 51.0 (CH<sub>2</sub>), 44.2 (CH<sub>2</sub>), 38.1 (CH<sub>2</sub>), 34.4 (CH), 34.2 (C<sub>q</sub>), 33.7 (CH<sub>2</sub>), 33.1 (CH<sub>2</sub>), 31.9 (CH<sub>2</sub>), 28.9 (CH<sub>3</sub>), 28.8 (CH<sub>3</sub>), 26.5 (CH<sub>2</sub>), 26.3 (CH<sub>2</sub>), 26.2 (CH<sub>2</sub>).

**HRMS (ESI) (m/z):** calcd for C<sub>17</sub>H<sub>27</sub>O<sub>2</sub> [M+H]<sup>+</sup> 263.2006 found 263.2007.

**FT-IR (cm<sup>-1</sup>):** 3020, 2932, 2403, 1624, 1521, 1098, 931, 761.

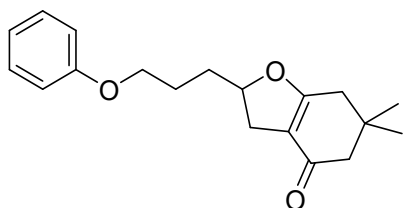

**6,6-Dimethyl-2-(3-phenoxypropyl)-3,5,6,7-tetrahydrobenzofuran-4(2H)-one (3pa)**

General procedure **A** was followed using (pent-4-en-1-yloxy) benzene (**1p**) (64.9 mg, 0.40 mmol, 1.0 equiv.), 5,5-dimethyl cyclohexane-1,3-dione (**2a**) (112 mg, 0.80 mmol, 2.0 equiv.), Co-salen (**6**) (6.1 mg, 10 μmol, 0.025 equiv.) and tetrabutylammonium hexafluorophosphate (155 mg, 0.40 mmol, 1.0 equiv.) in CH<sub>3</sub>CN (4 mL) for 12 h. Purification by column chromatography using (pet ether/EtOAc =2:1) yielded **3pa** (78.1 mg, 65%) as a colourless oil.

**<sup>1</sup>H NMR (400 MHz, CDCl<sub>3</sub>)** δ = 7.28 (dd, J = 8.0, 7.3 Hz, 2H), 6.94 (dd, J = 8.0, 7.3 Hz, 1H), 6.89 (d, J = 8.0 Hz, 2H), 4.95 – 4.83 (m, 1H), 3.99 (t, J = 9.5 Hz, 2H), 3.00 – 2.89 (m, 1H), 2.51 (dd, J = 14.1, 7.3 Hz, 1H), 2.26 (s, 2H), 2.22 (s, 2H), 2.01 – 1.74 (m, 4H), 1.09 (s, 6H).

**<sup>13</sup>C NMR (101 MHz, CDCl<sub>3</sub>)** δ = 195.0 (C<sub>q</sub>), 176.3 (C<sub>q</sub>), 158.9 (C<sub>q</sub>), 129.6 (CH), 120.8 (CH), 114.6 (CH), 111.6 (C<sub>q</sub>), 86.0 (CH), 67.2 (CH<sub>2</sub>), 51.0 (CH<sub>2</sub>), 38.0 (CH<sub>2</sub>), 34.2 (C<sub>q</sub>), 33.0 (CH<sub>2</sub>), 31.4 (CH<sub>2</sub>), 28.9 (CH<sub>3</sub>), 28.8 (CH<sub>3</sub>), 25.1 (CH<sub>2</sub>).

**HRMS (ESI) (m/z):** calcd for C<sub>19</sub>H<sub>25</sub>O<sub>3</sub> [M+H]<sup>+</sup> 301.1798 found 301.1800.

**FT-IR (cm<sup>-1</sup>):** 3019, 2960, 1713, 1627, 1217, 1041, 929, 769.

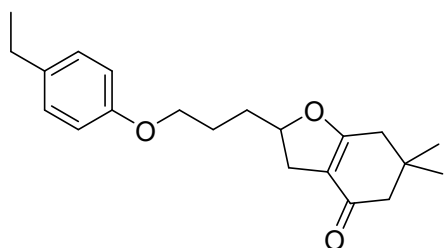

**2-[3-(4-Ethylphenoxy)propyl]-6,6-dimethyl-3,5,6,7-tetrahydrobenzofuran-4(2H)-one (3qa)**

General procedure **A** was followed using 1-ethyl-4-(pent-4-en-1-yloxy) benzene (**1q**) (76.1 mg, 0.40 mmol, 1.0 equiv.), 5,5-dimethyl cyclohexane-1,3-dione (**2a**) (112 mg, 0.80 mmol, 2.0 equiv.), Co-salen (**6**) (6.1 mg, 10 μmol, 0.025 equiv.) and tetrabutylammonium hexafluorophosphate (155 mg, 0.40 mmol, 1.0 equiv.) in CH<sub>3</sub>CN (4 mL) for 12 h. Purification by column chromatography using (pet ether/EtOAc =2:1) yielded **3qa** (86.7 mg, 66%) as a colourless oil.

**<sup>1</sup>H NMR (400 MHz, CDCl<sub>3</sub>)** δ = 7.10 (d, J = 7.9 Hz, 2H), 6.81 (d, J = 7.9 Hz, 2H), 4.96 – 4.80 (m, 1H), 4.06 – 3.90 (m, 2H), 3.00 – 2.91 (m, 1H), 2.58 (q, J = 7.3 Hz, 2H), 2.50 (dd, J = 14.1, 7.2 Hz, 1H), 2.26 (s, 2H), 2.22 (s, 2H), 2.02 – 1.72 (m, 4H), 1.20 (t, J = 7.4 Hz, 3H), 1.09 (s, 6H).

$^{13}\text{C}$  NMR (101 MHz,  $\text{CDCl}_3$ )  $\delta$  = 194.9 ( $\text{C}_q$ ), 176.3 ( $\text{C}_q$ ), 156.9 ( $\text{C}_q$ ), 136.5 ( $\text{C}_q$ ), 128.8 (CH), 114.4 (CH), 111.5 ( $\text{C}_q$ ), 85.9 (CH), 67.3 ( $\text{CH}_2$ ), 51.0 ( $\text{CH}_2$ ), 37.9 ( $\text{CH}_2$ ), 34.1 ( $\text{C}_q$ ), 32.9 ( $\text{CH}_2$ ), 31.3 ( $\text{CH}_2$ ), 28.8 ( $\text{CH}_3$ ), 28.7 ( $\text{CH}_3$ ), 28.0 ( $\text{CH}_2$ ), 25.1 ( $\text{CH}_2$ ), 15.9 ( $\text{CH}_3$ ).

HRMS (ESI) (m/z): calcd for  $\text{C}_{21}\text{H}_{29}\text{O}_3$   $[\text{M}+\text{H}]^+$  329.2111 found 329.2112.

FT-IR ( $\text{cm}^{-1}$ ): 3019, 2961, 1626, 1513, 1218, 1109, 928, 769.

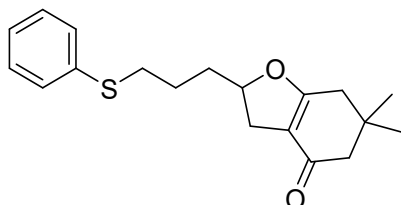

### 6,6-Dimethyl-2-(3-(phenylthio)propyl)-3,5,6,7-tetrahydrobenzofuran-4(2H)-one (3ra)

General procedure A was followed using pent-4-en-1-yl (phenyl) sulfane (**1r**) (71.3 mg, 0.40 mmol, 1.0 equiv.), 5,5-dimethyl cyclohexane-1,3-dione (**2a**) (112 mg, 0.80 mmol, 2.0 equiv.), Co-salen (**6**) (6.1 mg, 10  $\mu\text{mol}$ , 0.025 equiv.) and tetrabutylammonium hexafluorophosphate (155 mg, 0.40 mmol, 1.0 equiv.) in  $\text{CH}_3\text{CN}$  (4 mL) for 12 h. Purification by column chromatography using (pet ether/EtOAc =2:1) yielded **3ra** (72.2 mg, 57%) as a white solid.

$^1\text{H}$  NMR (400 MHz,  $\text{CDCl}_3$ )  $\delta$  = 7.34 – 7.33 (m, 2H), 7.31 – 7.24 (m, 2H), 7.18 (tt,  $J$  = 8.4, 2.0 Hz, 1H), 4.81 (dtd,  $J$  = 10.0, 7.3, 4.9 Hz, 1H), 3.00 – 2.86 (m, 3H), 2.45 (ddt,  $J$  = 14.3, 7.3, 1.7 Hz, 1H), 2.24 (d,  $J$  = 1.5 Hz, 2H), 2.21 (s, 2H), 1.90 – 1.66 (m, 4H), 1.09 (s, 3H), 1.08 (s, 3H).

$^{13}\text{C}$  NMR (101 MHz,  $\text{CDCl}_3$ )  $\delta$  = 194.9 ( $\text{C}_q$ ), 176.3 ( $\text{C}_q$ ), 136.3 ( $\text{C}_q$ ), 129.5 (CH), 129.0 (CH), 126.2 (CH), 111.5 ( $\text{C}_q$ ), 85.7 (CH), 51.0 ( $\text{CH}_2$ ), 37.9 ( $\text{CH}_2$ ), 35.2 ( $\text{CH}_2$ ), 34.2 ( $\text{C}_q$ ), 33.6 ( $\text{CH}_2$ ), 31.3 ( $\text{CH}_2$ ), 28.8 ( $\text{CH}_3$ ), 28.7 ( $\text{CH}_3$ ), 24.8 ( $\text{CH}_2$ ).

HRMS (ESI) (m/z): calcd for  $\text{C}_{19}\text{H}_{25}\text{O}_2\text{S}$   $[\text{M}+\text{H}]^+$  317.1570 found 317.1572.

FT-IR ( $\text{cm}^{-1}$ ): 3014, 2958, 1714, 1627, 1218, 1097, 1031, 925, 766.

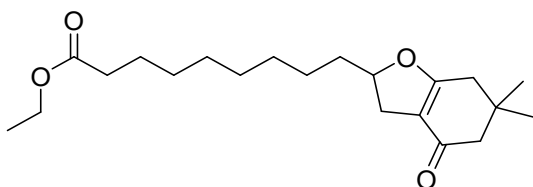

### Ethyl 9-(6,6-dimethyl-4-oxo-2,3,4,5,6,7-hexahydrobenzofuran-2-yl)nonanoate (3sa)

General procedure A was followed using ethyl undec-10-enoate (**1s**) (84.9 mg, 0.40 mmol, 1.0 equiv.), 5,5-dimethyl cyclohexane-1,3-dione (**2a**) (112 mg, 0.80 mmol, 2.0 equiv.), Co-salen (**6**) (6.1 mg, 10  $\mu\text{mol}$ , 0.025 equiv.) and tetrabutylammonium hexafluorophosphate (155 mg, 0.40 mmol, 1.0 equiv.) in  $\text{CH}_3\text{CN}$  (4 mL) for 12 h. Purification by column chromatography using (pet ether/EtOAc =2:1) yielded **3sa** (86.9 mg, 62%) as a colourless oil.

**<sup>1</sup>H NMR (400 MHz, CDCl<sub>3</sub>)** δ = 4.77 (dt, J = 13.3, 7.1 Hz, 1H), 4.09 (q, J = 7.1 Hz, 2H), 2.86 (dd, J = 14.2, 9.9 Hz, 1H), 2.42 (dd, J = 14.2, 7.4 Hz, 1H), 2.29 – 2.21 (m, 4H), 2.18 (s, 2H), 1.77 – 1.65 (m, 1H), 1.63 – 1.53 (m, 3H), 1.44 – 1.24 (m, 10H), 1.22 (t, J = 7.1 Hz, 3H), 1.06 (s, 3H), 1.06 (s, 3H).

**<sup>13</sup>C NMR (101 MHz, CDCl<sub>3</sub>)** δ = 195.0 (C<sub>q</sub>), 176.4 (C<sub>q</sub>), 173.9 (C<sub>q</sub>), 111.5 (C<sub>q</sub>), 86.5 (CH), 60.2 (CH<sub>2</sub>), 51.0 (CH<sub>2</sub>), 38.0 (CH<sub>2</sub>), 36.2 (CH<sub>2</sub>), 34.4 (CH<sub>2</sub>), 34.1 (C<sub>q</sub>), 31.2 (CH<sub>2</sub>), 29.4 (CH<sub>2</sub>), 29.3 (CH<sub>2</sub>), 29.2 (CH<sub>2</sub>), 29.1 (CH<sub>2</sub>), 28.8 (CH<sub>3</sub>), 28.7 (CH<sub>3</sub>), 25.0 (CH<sub>2</sub>), 25.0 (CH<sub>2</sub>), 14.3 (CH<sub>3</sub>).

**HRMS (ESI) (m/z):** calcd for C<sub>21</sub>H<sub>35</sub>O<sub>4</sub> [M+H]<sup>+</sup> 351.2530 found 351.2531.

**FT-IR (cm<sup>-1</sup>):** 3022, 2934, 1723, 1625, 1216, 1105, 927, 774.

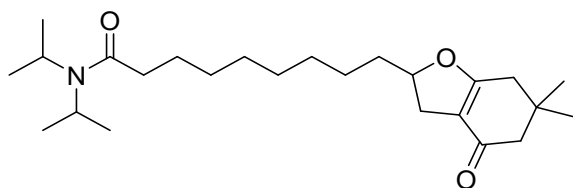

**9-(6,6-Dimethyl-4-oxo-2,3,4,5,6,7-hexahydrobenzofuran-2-yl)-N,N-diisopropylnonanamide (3ta)**

General procedure A was followed using N, N-diisopropylundec-10-enamide (**1t**) (107.0 mg, 0.40 mmol, 1.0 equiv.), 5, 5-dimethyl cyclohexane-1,3-dione (**2a**) (112 mg, 0.80 mmol, 2.0 equiv.), Co-salen (**6**) (6.1 mg, 10 μmol, 0.025 equiv.) and tetrabutylammonium hexafluorophosphate (155 mg, 0.40 mmol, 1.0 equiv.) in CH<sub>3</sub>CN (4 mL) for 12 h. Purification by column chromatography using (pet ether/EtOAc = 1:1) yielded **3ta** (99.0 mg, 61%) as a colourless oil.

**<sup>1</sup>H NMR (400 MHz, CDCl<sub>3</sub>)** δ = 4.79 – 4.72 (m, 1H), 3.92 (dt, J = 13.2, 6.6 Hz, 1H), 3.43 (bs, 1H), 2.85 (dd, J = 14.1, 10.0 Hz, 1H), 2.41 (dd, J = 14.2, 7.4 Hz, 1H), 2.24 – 2.20 (m, 4H), 2.17 (s, 2H), 1.75 – 1.62 (m, 1H), 1.62 – 1.47 (m, 3H), 1.32 (d, J = 6.7 Hz, 6H), 1.28 – 1.20 (bs, 10H), 1.15 (d, J = 6.7 Hz, 6H), 1.05 (s, 3H), 1.04 (s, 3H).

**<sup>13</sup>C NMR (101 MHz, CDCl<sub>3</sub>)** δ = 194.9 (C<sub>q</sub>), 176.4 (C<sub>q</sub>), 172.0 (C<sub>q</sub>), 111.5 (C<sub>q</sub>), 86.4 (CH), 50.9 (CH<sub>2</sub>), 48.3 (CH), 45.5 (CH), 37.9 (CH<sub>2</sub>), 36.2 (CH<sub>2</sub>), 35.4 (CH<sub>2</sub>), 34.1 (C<sub>q</sub>), 31.2 (CH<sub>2</sub>), 29.5 (CH<sub>2</sub>), 29.4 (CH<sub>2</sub>), 29.4 (CH<sub>2</sub>), 28.8 (CH<sub>3</sub>), 28.7 (CH<sub>3</sub>), 25.5 (CH<sub>2</sub>), 25.0 (CH<sub>2</sub>), 21.1 (CH<sub>3</sub>), 20.8 (CH<sub>3</sub>).

**HRMS (ESI) (m/z):** calcd for C<sub>25</sub>H<sub>44</sub>NO<sub>3</sub> [M+H]<sup>+</sup> 406.3316 found 406.3305.

**FT-IR (cm<sup>-1</sup>):** 3022, 2934, 1723, 1625, 1216, 1105, 927, 774.

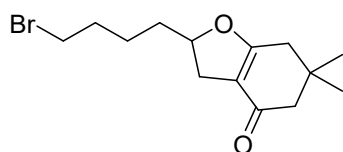

**2-(4-Bromobutyl)-6,6-dimethyl-3,5,6,7-tetrahydrobenzofuran-4(2H)-one (3ua)**

General procedure A was followed using 6-bromohex-1-ene (**1u**) (65.2 mg, 0.40 mmol, 1.0 equiv.), 5, 5-dimethyl cyclohexane-1,3-dione (**2a**) (112 mg, 0.80 mmol, 2.0 equiv.), Co-salen (**6**) (6.1 mg,

10  $\mu\text{mol}$ , 0.025 equiv.) and tetrabutylammonium hexafluorophosphate (155 mg, 0.40 mmol, 1.0 equiv.) in  $\text{CH}_3\text{CN}$  (4 mL) for 12 h. Purification by column chromatography using (pet ether/EtOAc =2:1) yielded **3ua** (72.3 mg, 60%) as a colourless oil.

**$^1\text{H}$  NMR (400 MHz,  $\text{CDCl}_3$ )**  $\delta$  = 4.83 – 4.75 (m, 1H), 3.39 (t,  $J$  = 6.7 Hz, 2H), 2.89 (dd,  $J$  = 14.3, 10.0 Hz, 1H), 2.44 (dd,  $J$  = 14.3, 7.4 Hz, 1H), 2.23 (s, 2H), 2.18 (s, 2H), 1.92 – 1.84 (m, 2H), 1.79 – 1.47 (m, 4H), 1.06 (s, 3H), 1.06 (s, 3H).

**$^{13}\text{C}$  NMR (101 MHz,  $\text{CDCl}_3$ )**  $\delta$  = 194.9 ( $\text{C}_q$ ), 176.3 ( $\text{C}_q$ ), 111.5 ( $\text{C}_q$ ), 85.9 (CH), 50.9 ( $\text{CH}_2$ ), 37.9 ( $\text{CH}_2$ ), 35.3 ( $\text{CH}_2$ ), 34.1 ( $\text{C}_q$ ), 33.4 ( $\text{CH}_2$ ), 32.4 ( $\text{CH}_2$ ), 31.3 ( $\text{CH}_2$ ), 28.8 ( $\text{CH}_3$ ), 28.7 ( $\text{CH}_3$ ), 23.8 ( $\text{CH}_2$ ).

**HRMS (ESI) (m/z):** calcd for  $\text{C}_{14}\text{H}_{22}\text{BrO}_2$  [ $\text{M}+\text{H}$ ] $^+$  301.0798 found 301.0803.

**FT-IR ( $\text{cm}^{-1}$ ):** 3021, 2967, 1717, 1625, 1216, 1037, 927, 769.

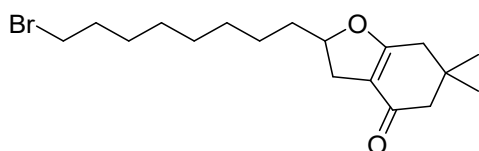

### 2-(8-Bromooctyl)-6,6-dimethyl-3,5,6,7-tetrahydrobenzofuran-4(2H)-one (**3va**)

General procedure **A** was followed using 10-bromodec-1-ene (**1v**) (87.7 mg, 0.40 mmol, 1.0 equiv.), 5,5-dimethyl cyclohexane-1,3-dione (**2a**) (112 mg, 0.80 mmol, 2.0 equiv.), Co-salen (**6**) (6.1 mg, 10  $\mu\text{mol}$ , 0.025 equiv.) and tetrabutylammonium hexafluorophosphate (155 mg, 0.40 mmol, 1.0 equiv.) in  $\text{CH}_3\text{CN}$  (4 mL) for 12 h. Purification by column chromatography using (pet ether/EtOAc =2:1) yielded **3va** (91.5 mg, 64%) as a colourless oil.

**$^1\text{H}$  NMR (400 MHz,  $\text{CDCl}_3$ )**  $\delta$  = 4.85 – 4.70 (m, 1H), 3.37 (t,  $J$  = 6.8 Hz, 2H), 2.95 – 2.84 (m, 1H), 2.43 (ddd,  $J$  = 12.6, 5.4, 3.8 Hz, 1H), 2.23 (s, 2H), 2.18 (s, 2H), 1.81 (dd,  $J$  = 14.6, 7.0 Hz, 2H), 1.77 – 1.65 (m, 1H), 1.65 – 1.53 (m, 1H), 1.39 (d,  $J$  = 6.1 Hz, 4H), 1.33 – 1.24 (m, 6H), 1.07 (s, 3H), 1.06 (s, 3H).

**$^{13}\text{C}$  NMR (101 MHz,  $\text{CDCl}_3$ )**  $\delta$  = 194.9 ( $\text{C}_q$ ), 176.4 ( $\text{C}_q$ ), 111.5 ( $\text{C}_q$ ), 86.4 (CH), 51.0 ( $\text{CH}_2$ ), 38.0 ( $\text{CH}_2$ ), 36.2 ( $\text{CH}_2$ ), 34.1 ( $\text{C}_q$ ), 34.0 ( $\text{CH}_2$ ), 32.8 ( $\text{CH}_2$ ), 31.2 ( $\text{CH}_2$ ), 29.3 ( $\text{CH}_2$ ), 29.3 ( $\text{CH}_2$ ), 28.9 ( $\text{CH}_3$ ), 28.7 ( $\text{CH}_3$ ), 28.7 ( $\text{CH}_2$ ), 28.2 ( $\text{CH}_2$ ), 24.9 ( $\text{CH}_2$ ).

**HRMS (ESI) (m/z):** calcd for  $\text{C}_{18}\text{H}_{30}\text{BrO}_2$  [ $\text{M}+\text{H}$ ] $^+$  357.1424 found 357.1431.

**FT-IR ( $\text{cm}^{-1}$ ):** 3020, 2933, 1624, 1525, 1031, 927, 758, 668.

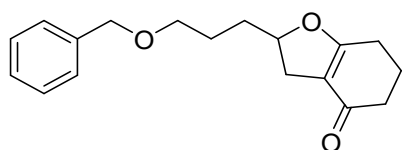

### 2-[3-(Benzyloxy)propyl]-3,5,6,7-tetrahydrobenzofuran-4(2H)-one (**3cb**)

General procedure **A** was followed using **1e** (pent-4-en-1-yloxy) methyl benzene (**1c**) (70.5 mg, 0.40 mmol, 1.0 equiv.), cyclohexane-1,3-dione (**2b**) (89.7 mg, 0.80 mmol, 2.0 equiv.), Co-salen (**6**) (6.1 mg, 10  $\mu$ mol, 0.025 equiv.) and tetrabutylammonium hexafluorophosphate (155 mg, 0.40 mmol, 1.0 equiv.) in CH<sub>3</sub>CN (4 mL) for 12 h. Purification by column chromatography using (pet ether/EtOAc =1:1) yielded **3cb** (75.6 mg, 66%) as a colourless oil.

<sup>1</sup>H NMR (400 MHz, CDCl<sub>3</sub>)  $\delta$  = 7.33 – 7.23 (m, 4H), 7.22 – 7.17 (m, 1H), 4.81 – 4.68 (m, 1H), 4.43 (s, 2H), 3.43 (t, J = 5.7 Hz, 2H), 2.83 (dd, J = 14.2, 10.0 Hz, 1H), 2.39 (dd, J = 14.3, 7.4 Hz, 1H), 2.31 (t, J = 6.1 Hz, 2H), 2.28 – 2.22 (m, 2H), 2.02 – 1.90 (m, 2H), 1.81 – 1.56 (m, 4H).

<sup>13</sup>C NMR (101 MHz, CDCl<sub>3</sub>)  $\delta$  = 195.6 (C<sub>q</sub>), 177.4 (C<sub>q</sub>), 138.5 (C<sub>q</sub>), 128.4 (CH), 127.6 (CH), 113.0 (C<sub>q</sub>), 85.9 (CH), 73.0 (CH<sub>2</sub>), 69.7 (CH<sub>2</sub>), 36.4 (CH<sub>2</sub>), 33.0 (CH<sub>2</sub>), 31.5 (CH<sub>2</sub>), 25.5 (CH<sub>2</sub>), 24.0 (CH<sub>2</sub>), 21.7 (CH<sub>2</sub>). One carbon signal is missing due to the resonance of the signals.

HRMS (ESI) (m/z): calcd for C<sub>18</sub>H<sub>23</sub>O<sub>3</sub> [M+H]<sup>+</sup> 287.1642 found 287.1644

FT-IR (cm<sup>-1</sup>): 3017, 2949, 1624, 1219, 1101, 1101, 931, 770.

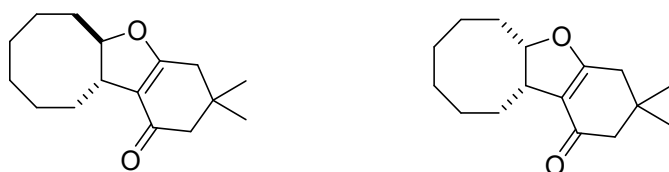

**anti-3,3-Dimethyl-3,4,5a,6,7,8,9,10,11,11a-decahydrocycloocta[b]benzofuran-1(2H)-one** (**4wa-anti**)

**syn-3,3-Dimethyl-3,4,5a,6,7,8,9,10,11,11a-decahydrocycloocta[b]benzofuran-1(2H)-one** (**4wa-syn**)

General procedure **A** was followed using (Z)-cyclooctene (**1w**) (44.1 mg, 0.40 mmol, 1.0 equiv.), 5,5-dimethyl cyclohexane-1,3-dione (**2a**) (112 mg, 0.80 mmol, 2.0 equiv.), Co-salen (**6**) (6.1 mg, 10  $\mu$ mol, 0.025 equiv.) and tetrabutylammonium hexafluorophosphate (155 mg, 0.40 mmol, 1.0 equiv.) in CH<sub>3</sub>CN (4 mL) for 12 h. Purification by column chromatography using (pet ether/EtOAc =3:1) yielded **4wa-anti** (35.8 mg, 36%) as a colourless oil and **4wa-syn** (17.9 mg, 18%) as white solid.

(**4wa-anti**)

<sup>1</sup>H NMR (500 MHz, CDCl<sub>3</sub>)  $\delta$  = 4.71 – 4.64 (m, 1H), 3.13 (t, J = 10.0 Hz, 1H), 2.61 – 2.52 (m, 1H), 2.29 – 2.19 (m, 3H), 2.14 (t, J = 15.6 Hz, 2H), 1.88 – 1.59 (m, 5H), 1.58 – 1.39 (m, 3H), 1.35 – 1.24 (m, 1H), 1.19 (td, J = 13.3, 3.2 Hz, 1H), 1.09 (s, 3H), 1.04 (s, 3H).

<sup>13</sup>C NMR (126 MHz, CDCl<sub>3</sub>)  $\delta$  = 195.3 (C<sub>q</sub>), 175.4 (C<sub>q</sub>), 115.5 (C<sub>q</sub>), 92.1 (CH), 51.6 (CH<sub>2</sub>), 44.5 (CH), 38.0 (CH<sub>2</sub>), 34.8 (CH<sub>2</sub>), 34.1 (C<sub>q</sub>), 33.4 (CH<sub>2</sub>), 29.0 (CH<sub>3</sub>), 28.6 (CH<sub>3</sub>), 27.0 (CH<sub>2</sub>), 24.4 (CH<sub>2</sub>), 22.6 (CH<sub>2</sub>). One carbon signal is missing due to the resonance of the signals.

HRMS (ESI) (m/z): calcd for C<sub>16</sub>H<sub>25</sub>O<sub>2</sub> [M+H]<sup>+</sup> 249.1849 found 249.1850

FT-IR (cm<sup>-1</sup>): 3021, 2931, 1624, 1522, 1216, 1118, 926, 770.

(4wa-syn)

<sup>1</sup>H NMR (500 MHz, CDCl<sub>3</sub>) δ = 4.63 (ddd, J = 11.6, 9.5 2.3 Hz, 1H), 3.08 (t, J = 9.5 Hz, 1H), 2.22 (s, 2H), 2.17 (d, J = 10.4 Hz, 2H), 2.12 – 2.01 (m, 1H), 1.98 – 1.90 (m, 1H), 1.87 (dt, J = 14.7, 3.7 Hz, 1H), 1.71 – 1.53 (m, 4H), 1.53 – 1.42 (m, 2H), 1.42 – 1.32 (m, 1H), 1.32 – 1.19 (m, 2H), 1.07 (s, 3H), 1.05 (s, 3H).

<sup>13</sup>C NMR (126 MHz, CDCl<sub>3</sub>) δ = 194.8 (C<sub>q</sub>), 174.7 (C<sub>q</sub>), 117.4 (C<sub>q</sub>), 90.6 (CH), 51.4 (CH<sub>2</sub>), 43.1 (CH), 37.9 (CH<sub>2</sub>), 34.0 (C<sub>q</sub>), 29.9 (CH<sub>2</sub>), 29.2 (CH<sub>3</sub>), 28.2 (CH<sub>3</sub>), 26.8 (CH<sub>2</sub>), 26.4 (CH<sub>2</sub>), 26.2 (CH<sub>2</sub>), 25.9 (CH<sub>2</sub>), 25.4 (CH<sub>2</sub>).

HRMS (ESI) (m/z): calcd for C<sub>16</sub>H<sub>25</sub>O<sub>2</sub> [M+H]<sup>+</sup> 249.1849 found 249.1849.

FT-IR (cm<sup>-1</sup>): 3022, 2929, 1627, 1522, 1216, 1028, 926, 773.

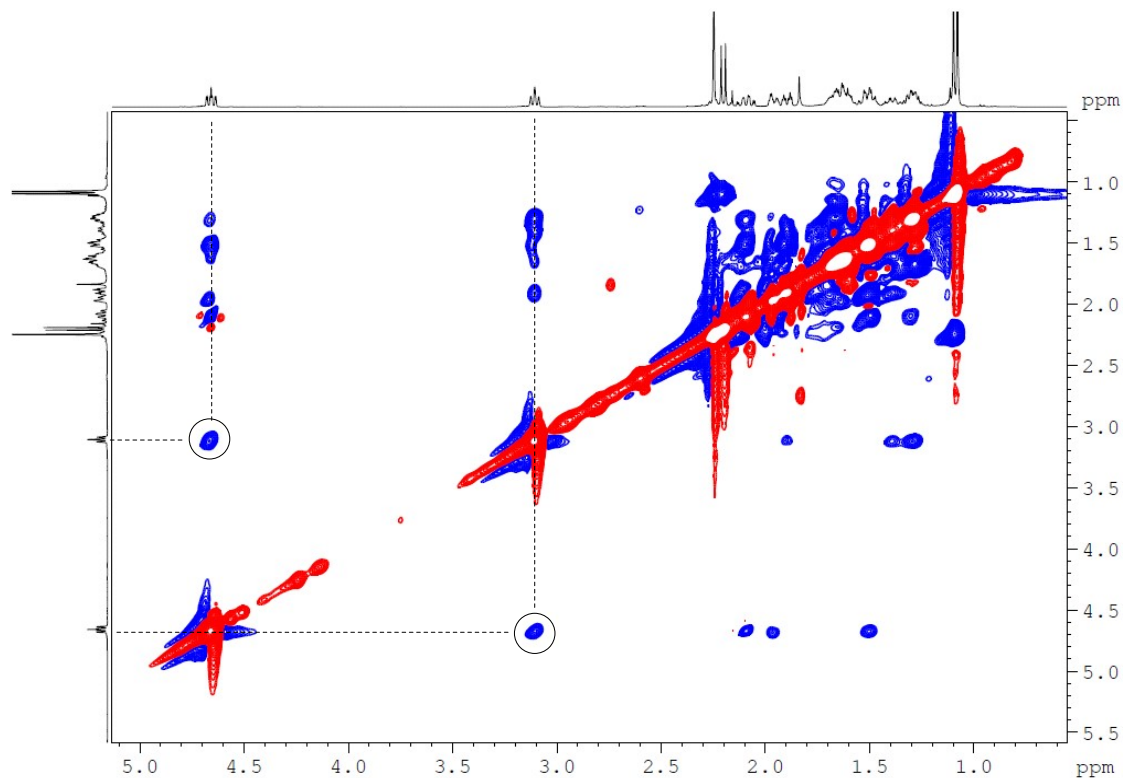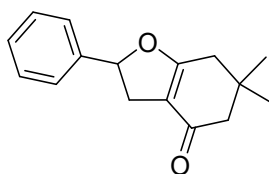

6,6-Dimethyl-2-phenyl-3,5,6,7-tetrahydrobenzofuran-4(2H)-one (3xa)

General procedure A was followed using styrene (**1x**) (41.7 mg, 0.40 mmol, 1.0 equiv.), 5,5-dimethyl cyclohexane-1,3-dione (**2a**) (112 mg, 0.80 mmol, 2.0 equiv.), Co-salen (**6**) (6.1 mg, 10  $\mu$ mol, 0.025 equiv.) and tetrabutylammonium hexafluorophosphate (155 mg, 0.40 mmol, 1.0 equiv.) in CH<sub>3</sub>CN (4 mL) for 12 h. Purification by column chromatography using (pet ether/EtOAc =2:1) yielded **3xa** (75.6 mg, 78%) as a colourless oil.

**<sup>1</sup>H NMR (500 MHz, CDCl<sub>3</sub>)**  $\delta$  = 7.38 (dd, J = 7.2, 7.2 Hz, 2H), 7.36 – 7.28 (m, 3H), 5.76 (dd, J = 10.5, 7.8 Hz, 1H), 3.43 – 3.19 (m, 1H), 2.88 (dd, J = 14.6, 7.8 Hz, 1H), 2.37 (s, 2H), 2.27 (d, J = 3.4 Hz, 2H), 1.14 (s, 3H), 1.14 (s, 3H).

**<sup>13</sup>C NMR (126 MHz, CDCl<sub>3</sub>)**  $\delta$  = 194.9 (C<sub>q</sub>), 176.2 (C<sub>q</sub>), 140.9 (C<sub>q</sub>), 128.9 (CH), 128.6 (CH), 125.9 (CH), 111.6 (C<sub>q</sub>), 86.7 (CH), 51.1 (CH<sub>2</sub>), 37.9 (CH<sub>2</sub>), 34.3 (C<sub>q</sub>), 34.0 (CH<sub>2</sub>), 29.0 (CH<sub>3</sub>), 28.7 (CH<sub>3</sub>).

**HRMS (ESI) (m/z):** calcd for C<sub>16</sub>H<sub>19</sub>O<sub>2</sub> [M+H]<sup>+</sup> 243.1380 found 243.1381.

**FT-IR (cm<sup>-1</sup>):** 3013, 2958, 1630, 1218, 1154, 1102, 926, 761.

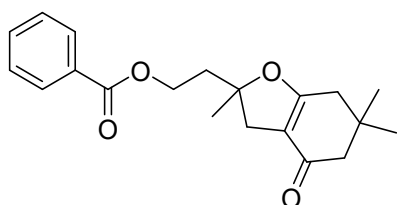

#### 2-(2,6,6-Trimethyl-4-oxo-2,3,4,5,6,7-hexahydrobenzofuran-2-yl)ethyl benzoate (**5a'a**)

General procedure A was followed using 3-methylbut-3-en-1-yl benzoate (**1a'**) (76.1 mg, 0.40 mmol, 1.0 equiv.), 5,5-dimethyl cyclohexane-1,3-dione (**2a**) (112 mg, 0.80 mmol, 2.0 equiv.), Co-salen (**6**) (6.1 mg, 10  $\mu$ mol, 0.025 equiv.) and tetrabutylammonium hexafluorophosphate (155 mg, 0.40 mmol, 1.0 equiv.) in CH<sub>3</sub>CN (4 mL) for 12 h. Purification by column chromatography using (pet ether/EtOAc =2:1) yielded **5a'a** (106.4 mg, 81%) as a colourless oil.

**<sup>1</sup>H NMR (400 MHz, CDCl<sub>3</sub>)**  $\delta$  = 7.99 (dd, J = 8.0, 1.4 Hz, 2H), 7.53 (dd, J = 8.0, 7.8 Hz, 1H), 7.41 (dd, J = 8.0, 7.8 Hz, 2H), 4.42 (td, J = 6.8, 2.2 Hz, 2H), 2.81 (dt, J = 14.4, 1.7 Hz, 1H), 2.62 (dt, J = 14.4, 1.7 Hz, 1H), 2.21 (d, J = 1.3 Hz, 2H), 2.19 – 2.15 (m, 4H), 1.47 (s, 3H), 1.06 (s, 3H), 1.04 (s, 3H).

**<sup>13</sup>C NMR (101 MHz, CDCl<sub>3</sub>)**  $\delta$  = 195.0 (C<sub>q</sub>), 175.0 (C<sub>q</sub>), 166.5 (C<sub>q</sub>), 133.1 (CH), 130.1 (C<sub>q</sub>), 129.6 (CH), 128.5 (CH), 111.1 (C<sub>q</sub>), 91.1 (C<sub>q</sub>), 60.8 (CH<sub>2</sub>), 50.9 (CH<sub>2</sub>), 39.6 (CH<sub>2</sub>), 37.9 (CH<sub>2</sub>), 37.8 (CH<sub>2</sub>), 34.1 (C<sub>q</sub>), 28.8 (CH<sub>3</sub>), 28.7 (CH<sub>3</sub>), 27.1 (CH<sub>3</sub>).

**HRMS (ESI) (m/z):** calcd for C<sub>20</sub>H<sub>25</sub>O<sub>4</sub> [M+H]<sup>+</sup> 329.1747 found 329.1749

**FT-IR (cm<sup>-1</sup>):** 3021, 2402, 2970, 1715, 1626, 1271, 1114, 926, 769.

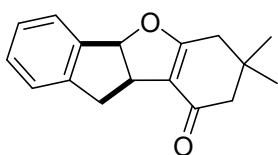

#### 7,7-Dimethyl-4b,6,7,8,9b,10-hexahydro-9H-indeno[1,2-b]benzofuran-9-one (**4ya**)



General procedure **A** was followed using 1H-indene (**1y**) (46.5 mg, 0.40 mmol, and 1.0 equiv.), 5,5-dimethyl cyclohexane-1,3-dione (**2a**) (112 mg, 0.80 mmol, 2.0 equiv.), Co-salen (**6**) (6.1 mg, 10  $\mu$ mol, 0.025 equiv.) and tetrabutylammonium hexafluorophosphate (155 mg, 0.40 mmol, 1.0 equiv.) in CH<sub>3</sub>CN (4 mL) for 12 h, purification by column chromatography using (pet ether/EtOAc =2:1) yielded **4ya** (81.4 mg, 80%) as a colourless oil.

**<sup>1</sup>H NMR (400 MHz, CDCl<sub>3</sub>)**  $\delta$  = 7.48 (d, *J* = 7.1 Hz, 1H), 7.36 – 7.30 (m, 1H), 7.29 – 7.26 (m, 2H), 6.20 (d, *J* = 8.8 Hz, 1H), 4.17 – 3.92 (m, 1H), 3.35 (dd, *J* = 17.1, 8.4 Hz, 1H), 3.16 (dd, *J* = 17.1, 2.3 Hz, 1H), 2.24 (dd, *J* = 4.9, 1.7 Hz, 2H), 2.19 (s, 2H), 1.09 (s, 3H), 1.01 (s, 3H).

**<sup>13</sup>C NMR (101 MHz, CDCl<sub>3</sub>)**  $\delta$  = 195.0 (C<sub>q</sub>), 175.6 (C<sub>q</sub>), 143.5 (C<sub>q</sub>), 139.5 (C<sub>q</sub>), 129.9 (CH), 127.2 (CH), 125.9 (CH), 125.7 (CH), 115.4 (C<sub>q</sub>), 93.7 (CH), 51.3 (CH<sub>2</sub>), 41.8 (CH), 38.0 (CH<sub>2</sub>), 37.5 (CH<sub>2</sub>), 34.1 (C<sub>q</sub>), 29.1 (CH<sub>3</sub>), 28.4 (CH<sub>3</sub>).

**HRMS (ESI) (m/z):** calcd for C<sub>17</sub>H<sub>19</sub>O<sub>2</sub> [M+H]<sup>+</sup> 255.1380 found 255.1381

**FT-IR (cm<sup>-1</sup>):** 3019, 2962, 1716, 1626, 1216, 1096, 927, 762.

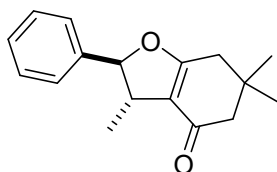

### 3,6,6-Trimethyl-2-phenyl-3,5,6,7-tetrahydrobenzofuran-4(2H)-one (**4za**)

General procedure **A** was followed using (E)-prop-1-en-1-ylbenzene (**1z**) (47.3 mg, 0.40 mmol, 1.0 equiv.), 5,5-dimethyl cyclohexane-1,3-dione (**2a**) (112 mg, 0.80 mmol, 2.0 equiv.), Co-salen (**6**) (6.1 mg, 10  $\mu$ mol, 0.025 equiv.) and tetrabutylammonium hexafluorophosphate (155 mg, 0.40 mmol, 1.0 equiv.) in CH<sub>3</sub>CN (4 mL) for 12 h. Purification by column chromatography using (pet ether/EtOAc =2:1) yielded **4za** (84.1 mg, 82%) as a colourless oil.

**<sup>1</sup>H NMR (400 MHz, CDCl<sub>3</sub>)**  $\delta$  = 7.28 – 7.23 (m, 3H), 7.21 – 7.15 (m, 2H), 5.08 (d, *J* = 6.5 Hz, 1H), 3.23 – 3.12 (m, 1H), 2.28 (s, 2H), 2.16 (d, *J* = 7.0 Hz, 2H), 1.29 (d, *J* = 6.8 Hz, 3H), 1.05 (s, 3H), 1.04 (s, 3H).

**<sup>13</sup>C NMR (101 MHz, CDCl<sub>3</sub>)**  $\delta$  = 194.8 (C<sub>q</sub>), 175.4 (C<sub>q</sub>), 140.4 (C<sub>q</sub>), 128.8 (CH), 128.5 (CH), 125.6 (CH), 115.8 (C<sub>q</sub>), 94.0 (CH), 51.4 (CH<sub>2</sub>), 42.9 (CH), 37.9 (CH<sub>2</sub>), 34.2 (C<sub>q</sub>), 28.7 (CH<sub>3</sub>), 28.6 (CH<sub>3</sub>), 19.4 (CH<sub>3</sub>).

**HRMS (ESI) (m/z):** calcd for C<sub>17</sub>H<sub>21</sub>O<sub>2</sub> [M+H]<sup>+</sup> 257.1536 found 257.1538.

**FT-IR (cm<sup>-1</sup>):** 3018, 2964, 1633, 1506, 1217, 1113, 937, 774.

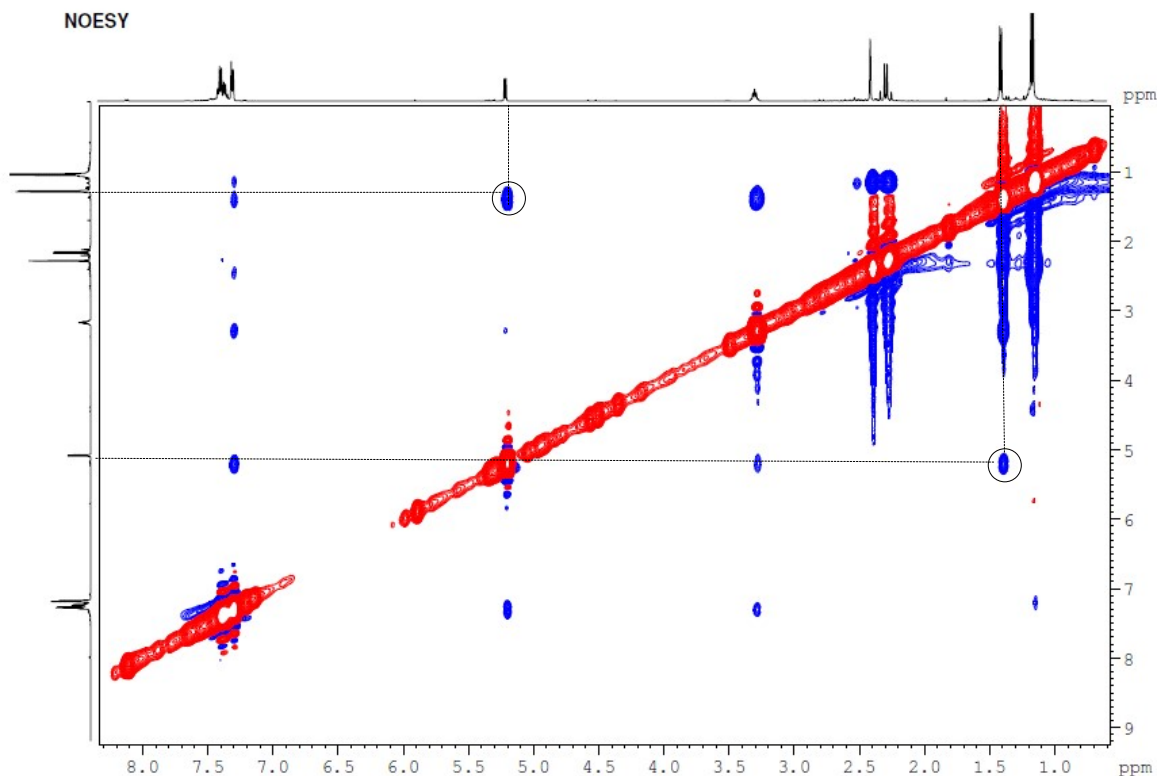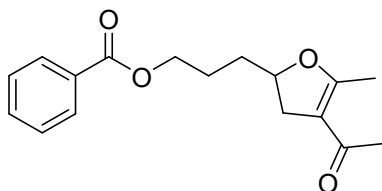

### 3-(4-Acetyl-5-methyl-2,3-dihydrofuran-2-yl)propyl benzoate (**3ac**)

General procedure A was followed using pent-4-en-1-yl benzoate (**1a**) (76.1 mg, 0.40 mmol, 1.0 equiv.), pentane-2,4-dione (**2c**) (80.1 mg, 0.80 mmol, 2.0 equiv.), Co-salen (**6**) (6.1 mg, 10  $\mu$ mol, 0.025 equiv.), sodium acetate (16.4 mg, 0.20 mmol, 0.5 equiv.) and tetrabutylammonium tetrafluoroborate (132 mg, 0.40 mmol, 1.0 equiv.) in  $\text{CH}_3\text{CN}/\text{HFIP}$  (3.5/0.5 mL) for 12 h. Purification by column chromatography using (pet ether/EtOAc =2:1) yielded **3ac** (70.4 mg, 61%) as a colourless oil.

$^1\text{H}$  NMR (400 MHz,  $\text{CDCl}_3$ )  $\delta$  = 8.02 (dd,  $J$  = 8.1, 1.0 Hz, 2H), 7.54 (t,  $J$  = 7.5 Hz, 1H), 7.43 (dd,  $J$  = 7.5, 7.5 Hz, 2H), 4.66 (tt,  $J$  = 14.6, 7.2 Hz, 1H), 4.35 (td,  $J$  = 5.9, 2.2 Hz, 2H), 3.04 (ddd,  $J$  = 13.8, 10.1, 1.1 Hz, 1H), 2.60 (ddd,  $J$  = 14.0, 7.9, 1.1 Hz, 1H), 2.19 (s, 3H), 2.18 (s, 3H), 1.96 – 1.72 (m, 4H).

$^{13}\text{C}$  NMR (101 MHz,  $\text{CDCl}_3$ )  $\delta$  = 194.6 ( $\text{C}_q$ ), 167.6 ( $\text{C}_q$ ), 166.6 ( $\text{C}_q$ ), 133.0 (CH), 130.3 ( $\text{C}_q$ ), 129.6 (CH), 128.4 (CH), 112.1 ( $\text{C}_q$ ), 82.0 (CH), 64.5 ( $\text{CH}_2$ ), 36.1 ( $\text{CH}_2$ ), 32.7 ( $\text{CH}_2$ ), 29.4 ( $\text{CH}_3$ ), 24.7 ( $\text{CH}_2$ ), 15.1 ( $\text{CH}_3$ ).

**HRMS (ESI) (m/z):** calcd for  $\text{C}_{17}\text{H}_{21}\text{O}_4$  [ $\text{M}+\text{H}$ ] $^+$  289.1434 found 289.1438.

**FT-IR (cm<sup>-1</sup>):** 3068, 2956, 2253, 1714, 1596, 1315, 909, 735, 650.

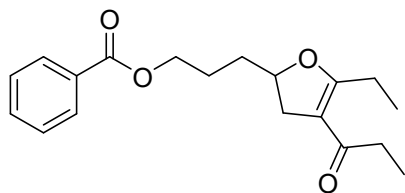

### 3-(5-Ethyl-4-propionyl-2,3-dihydrofuran-2-yl)propyl benzoate (**3ad**)

General procedure A was followed using pent-4-en-1-yl benzoate (**1a**) (76.1 mg, 0.40 mmol, 1.0 equiv.), heptane-3,5-dione (**2d**) (102.5 mg, 0.80 mmol, 2.0 equiv.), Co-salen (**6**) (6.1 mg, 10 μmol, 0.025 equiv.), sodium acetate (16.4 mg, 0.20 mmol, 0.5 equiv.) and tetrabutylammonium tetrafluoroborate (132 mg, 0.40 mmol, 1.0 equiv.) in CH<sub>3</sub>CN/HFIP (3.5/0.5 mL) for 16 h. Purification by column chromatography using (pet ether/EtOAc =2:1) yielded **3ad** (69.7 mg, 55%) as a colourless oil.

<sup>1</sup>H NMR (400 MHz, CDCl<sub>3</sub>) δ = 8.03 (dd, J = 7.1, 1.0 Hz, 2H), 7.55 (t, J = 7.5 Hz, 1H), 7.43 (dd, J = 7.5, 7.5 Hz, 2H), 4.71 – 4.64 (m, 1H), 4.42 – 4.29 (m, 2H), 3.06 (dd, J = 13.8, 10.2 Hz, 1H), 2.69 – 2.57 (m, 3H), 2.42 (q, J = 7.3 Hz, 2H), 1.98 – 1.71 (m, 4H), 1.12 (t, J = 7.5 Hz, 3H), 1.07 (t, J = 7.3 Hz, 3H).  
<sup>13</sup>C NMR (101 MHz, CDCl<sub>3</sub>) δ = 197.5 (C<sub>q</sub>), 171.9 (C<sub>q</sub>), 166.5 (C<sub>q</sub>), 132.9 (CH), 130.2 (C<sub>q</sub>), 129.5 (CH), 128.4 (CH), 109.6 (C<sub>q</sub>), 81.7 (CH), 64.5 (CH<sub>2</sub>), 35.8 (CH<sub>2</sub>), 34.5 (CH<sub>2</sub>), 32.7 (CH<sub>2</sub>), 24.6 (CH<sub>2</sub>), 22.0 (CH<sub>2</sub>), 11.1 (CH<sub>3</sub>), 7.9 (CH<sub>3</sub>).

**HRMS (ESI) (m/z):** calcd for C<sub>19</sub>H<sub>25</sub>O<sub>4</sub> [M+H]<sup>+</sup> 317.1747 found 317.1745.

**FT-IR (cm<sup>-1</sup>):** 2975, 2940, 1717, 1595, 1456, 1276, 1115, 756, 713.

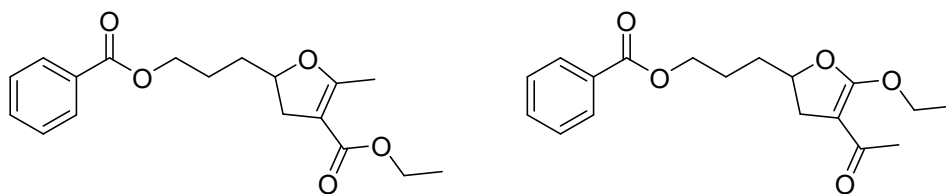

### Ethyl 5-(3-(benzoyloxy)propyl)-2-methyl-4,5-dihydrofuran-3-carboxylate (**3ae**) and 3-(4-acetyl-5-ethoxy-2,3-dihydrofuran-2-yl)propyl benzoate (**3ae-R**)

General procedure A was followed using pent-4-en-1-yl benzoate (**1a**) (76.1 mg, 0.40 mmol, 1.0 equiv.), ethyl 3-oxobutanoate (**2e**) (104.1 mg, 0.80 mmol, 2.0 equiv.), Co-salen (**6**) (6.1 mg, 10 μmol, 0.025 equiv.), sodium acetate (16.4 mg, 0.20 mmol, 0.5 equiv.) and tetrabutylammonium tetrafluoroborate (132 mg, 0.40 mmol, 1.0 equiv.) in CH<sub>3</sub>CN/HFIP (3.5/0.5 mL) for 6 h. Purification by column

chromatography using (pet ether/EtOAc =2:1 to 1:2) yielded **3ae** (47.0 mg, 37%) and **3ae-R** (11.5 mg, 9%) as a colourless oil.

### **3ae**

<sup>1</sup>H NMR (400 MHz, CDCl<sub>3</sub>) δ = 8.05 – 8.00 (m, 2H), 7.57 – 7.52 (m, 1H), 7.45 – 7.40 (m, 2H), 4.70 – 4.60 (m, 1H), 4.40 – 4.30 (m, 2H), 4.27 – 4.07 (m, 2H), 2.99 (t, J = 12.1 Hz, 1H), 2.63 – 2.45 (m, 1H), 2.17 (s, 3H), 1.95 – 1.70 (m, 4H), 1.30 – 1.20 (m, 3H).

<sup>13</sup>C NMR (101 MHz, CDCl<sub>3</sub>) δ = 167.8 (C<sub>q</sub>), 166.7 (C<sub>q</sub>), 166.4 (C<sub>q</sub>), 133.1 (CH), 130.4 (C<sub>q</sub>), 129.7 (CH), 128.5 (CH), 101.7 (C<sub>q</sub>), 81.9 (CH), 64.6 (CH<sub>2</sub>), 59.5 (CH<sub>2</sub>), 35.4 (CH<sub>2</sub>), 32.8 (CH<sub>2</sub>), 24.7 (CH<sub>2</sub>), 14.6 (CH<sub>3</sub>), 14.2 (CH<sub>3</sub>).

**HRMS (ESI) (m/z):** calcd for C<sub>18</sub>H<sub>22</sub>NaO<sub>5</sub> [M+Na]<sup>+</sup> 341.1359 found 341.1352.

**FT-IR (cm<sup>-1</sup>):** 2958, 2255, 1794, 1645, 1321, 1278, 909, 740, 651.

### **3ae-R**

<sup>1</sup>H NMR (400 MHz, CDCl<sub>3</sub>) δ = 8.03 (d, J = 7.8 Hz, 2H), 7.57 (t, J = 7.5 Hz, 1H), 7.44 (dd, J = 7.5, 7.5 Hz, 2H), 4.80 – 4.65 (m, 1H), 4.37 (t, J = 5.2 Hz, 2H), 4.29 (q, J = 7.1 Hz, 2H), 3.05 (dd, J = 13.4, 9.7 Hz, 1H), 2.61 (dd, J = 13.4, 7.2 Hz, 1H), 2.25 (s, 3H), 1.94 – 1.80 (m, 4H), 1.37 (t, J = 7.1 Hz, 3H).

<sup>13</sup>C NMR (101 MHz, CDCl<sub>3</sub>) δ = 192.5 (C<sub>q</sub>), 167.2 (C<sub>q</sub>), 166.7 (C<sub>q</sub>), 133.2 (CH), 130.3 (C<sub>q</sub>), 129.7 (CH), 128.6 (CH), 90.0 (C<sub>q</sub>), 82.0 (CH), 66.5 (CH<sub>2</sub>), 64.4 (CH<sub>2</sub>), 33.5 (CH<sub>2</sub>), 32.7 (CH<sub>2</sub>), 27.8 (CH<sub>3</sub>), 24.7 (CH<sub>2</sub>), 15.1 (CH<sub>3</sub>).

**HRMS (ESI) (m/z):** calcd for C<sub>18</sub>H<sub>23</sub>O<sub>5</sub> [M+H]<sup>+</sup> 319.1540 found 319.1541.

**FT-IR (cm<sup>-1</sup>):** 3015, 1715, 1584, 1443, 1276, 1217, 951, 757, 667.

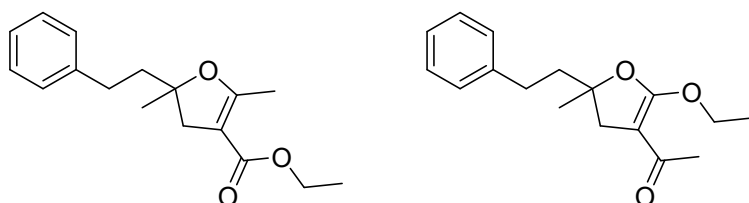

### **Ethyl 2,5-dimethyl-5-phenethyl-4,5-dihydrofuran-3-carboxylate (5i'e) and 1-(2-ethoxy-5-methyl-5-phenethyl-4,5-dihydrofuran-3-yl)ethan-1-one (5i'e-R)**

General procedure **A** was followed using (3-methylbut-3-en-1-yl)benzene (**1i'**) (58.5mg, 0.40 mmol, 1.0 equiv.), ethyl 3-oxobutanoate (**2e**) (104.1 mg, 0.80 mmol, 2.0 equiv.), Co-salen (**6**) (6.1 mg, 10 μmol, 0.025 equiv.), sodium acetate (16.4 mg, 0.20 mmol, 0.5 equiv.) and tetrabutylammonium tetrafluoroborate (132 mg, 0.40 mmol, 1.0 equiv.) in CH<sub>3</sub>CN/HFIP (3.5/0.5 mL) for 6 h. Purification by column chromatography using (pet ether/EtOAc =2:1 to 1:2) yielded **5i'e** (35.5 mg, 32%) and **5i'e-R** (35.0 mg, 32%) as a colourless oil.

### **5i'e**

$^1\text{H}$  NMR (400 MHz,  $\text{CDCl}_3$ )  $\delta$  = 7.25 – 7.17 (m, 2H), 7.15 – 7.08 (m, 3H), 4.10 (q,  $J$  = 7.1 Hz, 2H), 2.76 (dd,  $J$  = 14.4, 1.5 Hz, 1H), 2.65 – 2.52 (m, 3H), 2.11 (t,  $J$  = 1.4 Hz, 3H), 1.93 – 1.79 (m, 2H), 1.33 (s, 3H), 1.21 (t,  $J$  = 7.1 Hz, 3H).

$^{13}\text{C}$  NMR (101 MHz,  $\text{CDCl}_3$ )  $\delta$  = 167.0 ( $\text{C}_q$ ), 166.6 ( $\text{C}_q$ ), 142.0 ( $\text{C}_q$ ), 128.6 (CH), 128.4 (CH), 126.0 (CH), 101.3 ( $\text{C}_q$ ), 87.9 ( $\text{C}_q$ ), 59.5 ( $\text{CH}_2$ ), 43.2 ( $\text{CH}_2$ ), 40.9 ( $\text{CH}_2$ ), 30.3 ( $\text{CH}_2$ ), 26.9 ( $\text{CH}_3$ ), 14.6 ( $\text{CH}_3$ ), 14.5 ( $\text{CH}_3$ ).

**HRMS (ESI) (m/z):** calcd for  $\text{C}_{17}\text{H}_{23}\text{O}_3$  [ $\text{M}+\text{H}$ ] $^+$  275.1642 found 275.1638.

**FT-IR ( $\text{cm}^{-1}$ ):** 2980, 2933, 2254, 1683, 1642, 1381, 910, 743, 651.

### **5i'e-R**

$^1\text{H}$  NMR (400 MHz,  $\text{CDCl}_3$ )  $\delta$  7.28 (t,  $J$  = 7.2 Hz, 2H), 7.21 – 7.17 (m, 3H), 4.21 (dtd,  $J$  = 10.3, 7.1, 3.6 Hz, 2H), 2.90 (d,  $J$  = 13.5 Hz, 1H), 2.73 – 2.66 (m, 3H), 2.26 (s, 3H), 2.05 – 1.96 (m, 2H), 1.46 (s, 3H), 1.37 (t,  $J$  = 7.1 Hz, 3H).

$^{13}\text{C}$  NMR (101 MHz,  $\text{CDCl}_3$ )  $\delta$  = 192.5 ( $\text{C}_q$ ), 166.3 ( $\text{C}_q$ ), 141.5 ( $\text{C}_q$ ), 128.6 (CH), 128.4 (CH), 126.1 (CH), 90.1 ( $\text{C}_q$ ), 88.9 ( $\text{C}_q$ ), 66.1 ( $\text{CH}_2$ ), 42.9 ( $\text{CH}_2$ ), 39.1 ( $\text{CH}_2$ ), 30.2 ( $\text{CH}_2$ ), 27.8 ( $\text{CH}_3$ ), 26.7 ( $\text{CH}_3$ ), 15.1 ( $\text{CH}_3$ ).

**HRMS (ESI) (m/z):** calcd for  $\text{C}_{17}\text{H}_{23}\text{O}_3$  [ $\text{M}+\text{H}$ ] $^+$  275.1642 found 275.1643.

**FT-IR ( $\text{cm}^{-1}$ ):** 3017, 2935, 1727, 1582, 1436, 1216, 1053, 765, 668.

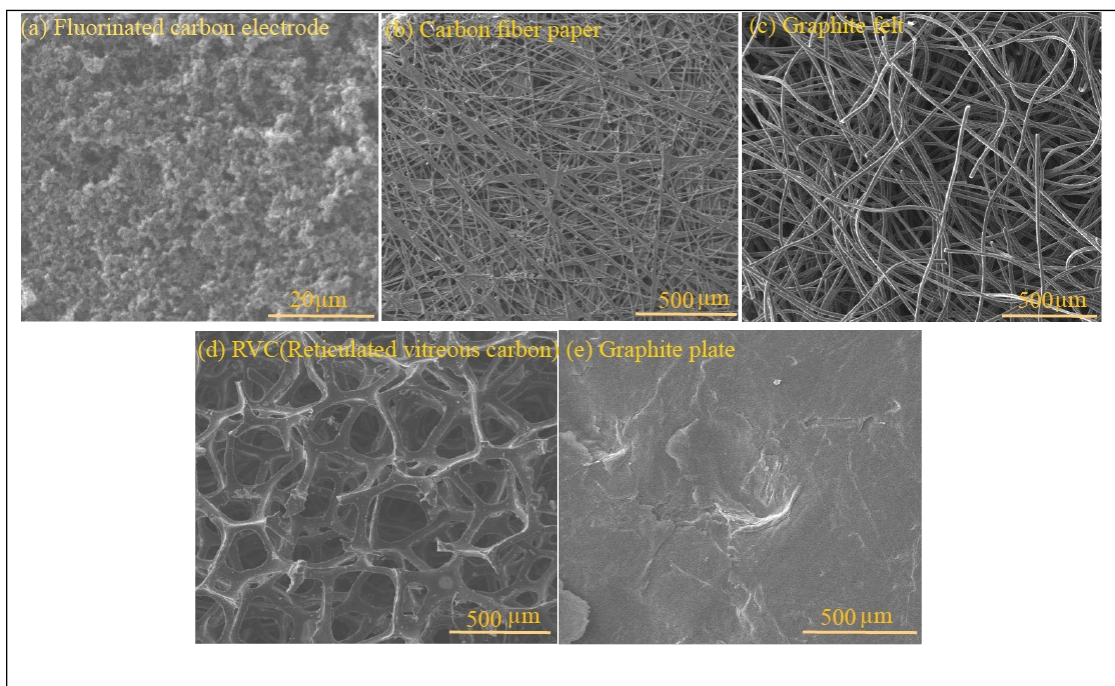

Char  
acteri  
zatio  
n of  
electr  
ode  
materi  
als

**Figure-S1:** (a) Polytetrafluoroethylene (PTFE)-coated carbon electrode (fluorinated carbon electrode), revealing a uniformly porous structure on the electrode surface; (b) ESEM image of PTFE-coated carbon fiber paper electrodes; (c) ESEM images of graphite felt; (d) ESEM image of reticulated vitreous carbon (RVC); (e) ESEM image of the graphite plate, which exhibits an almost flat 2D graphene structure, resulting in significantly lower porosity.

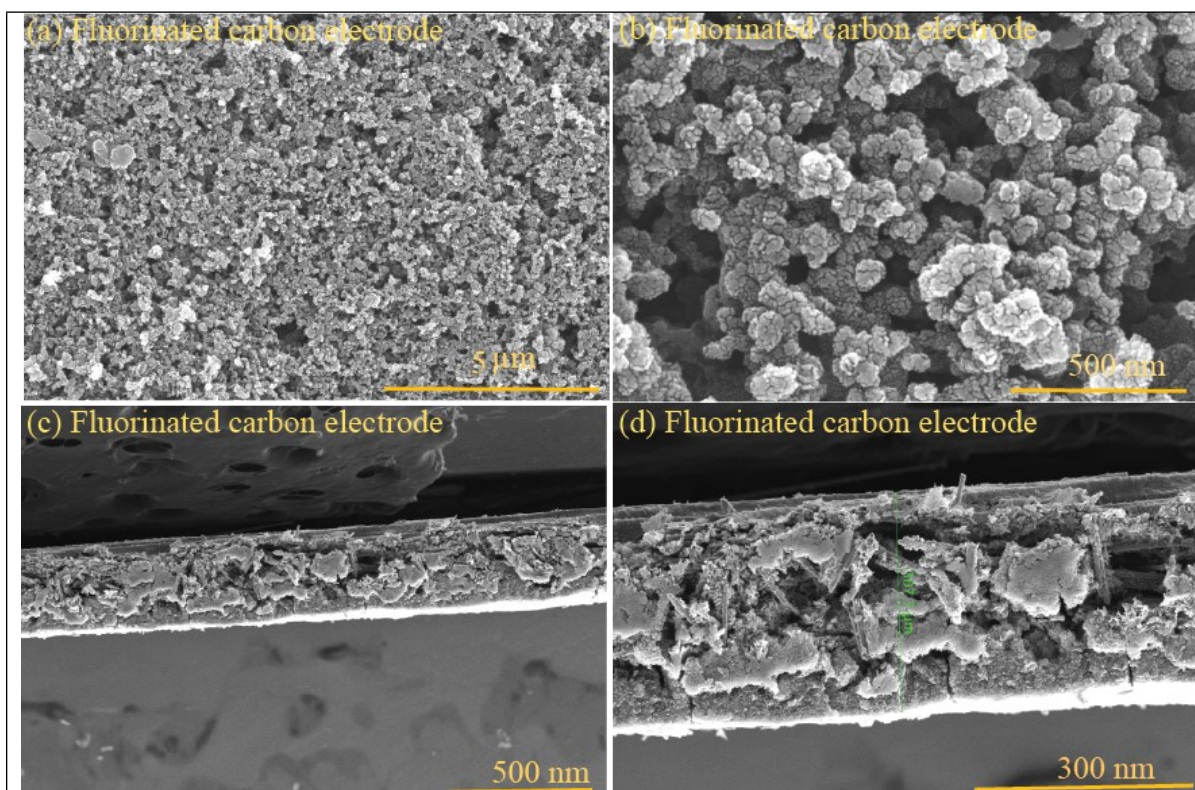

**Figure-S2:** (a)-(b) Field-emission scanning electron microscopy (FESEM) images of (PTFE)-coated carbon electrode (fluorinated carbon electrode), elucidating the microporous architecture; (c)-(d) cross-sectional FESEM images of the (PTFE)-coated carbon electrode displaying the heterojunction interface with an overall thickness of 200 μm.



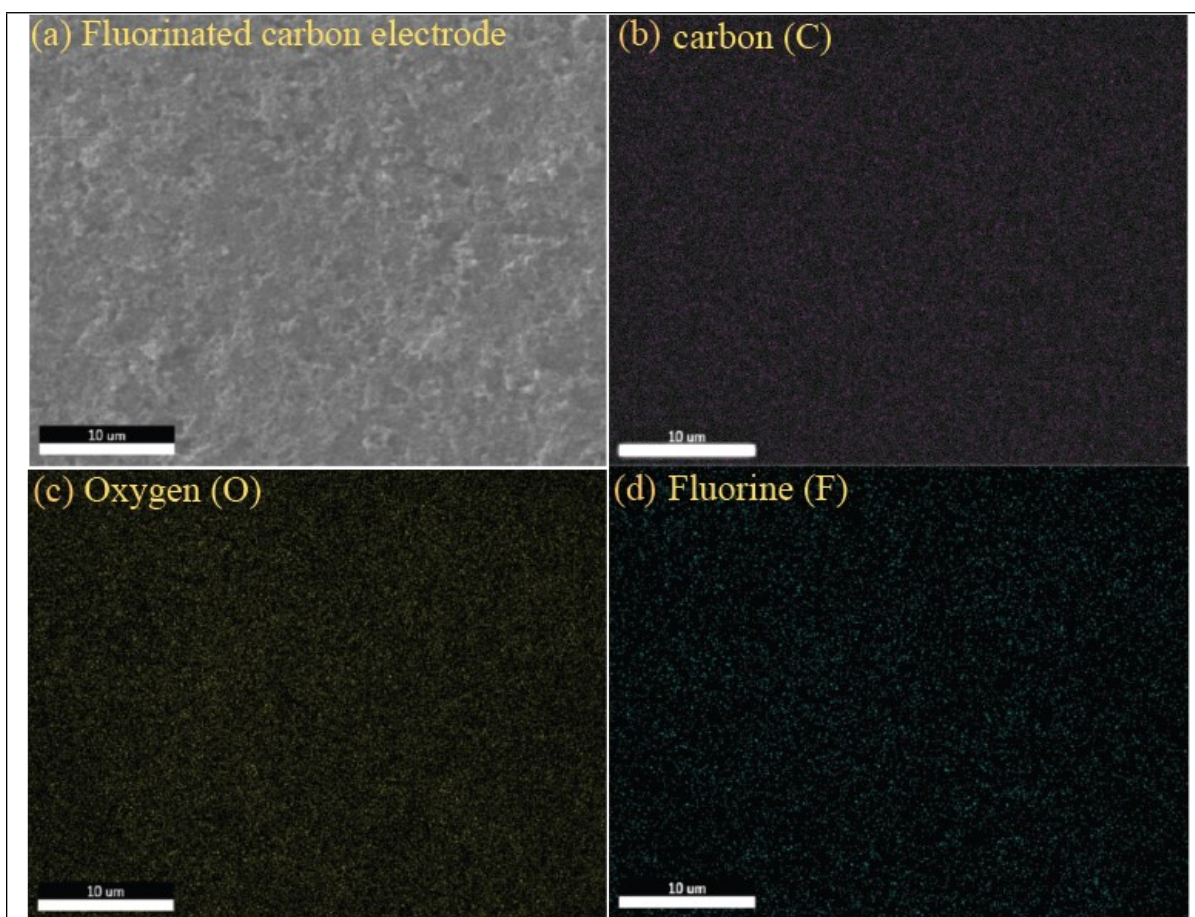

**Figure-S3:** (a-d) Elemental mapping was conducted for carbon (C), oxygen (O), and fluorine (F) on a polytetrafluoroethylene (PTFE)-coated carbon electrode.

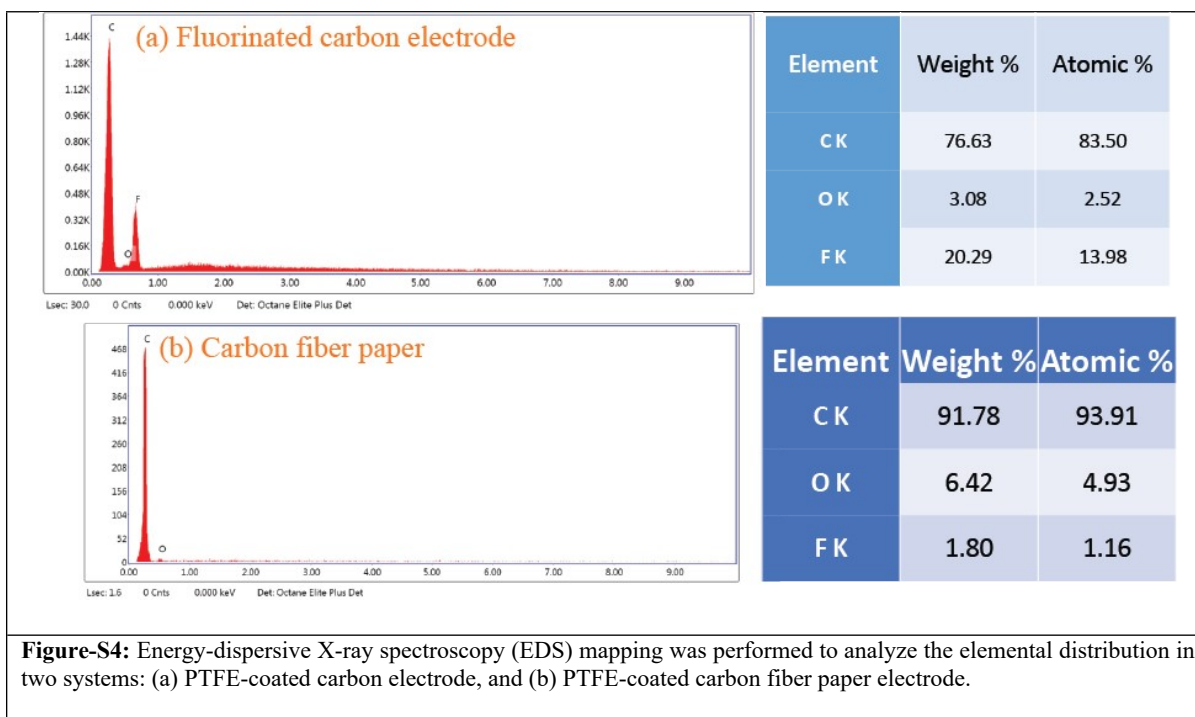

**Figure-S4:** Energy-dispersive X-ray spectroscopy (EDS) mapping was performed to analyze the elemental distribution in two systems: (a) PTFE-coated carbon electrode, and (b) PTFE-coated carbon fiber paper electrode.

## Cyclic Voltammetry

Cyclic voltammetry A glassy-carbon electrode (3 mm diameter, disc-electrode) was used as the working electrode, a Pt-wire as auxiliary electrode and an Ag–AgCl as reference electrode.

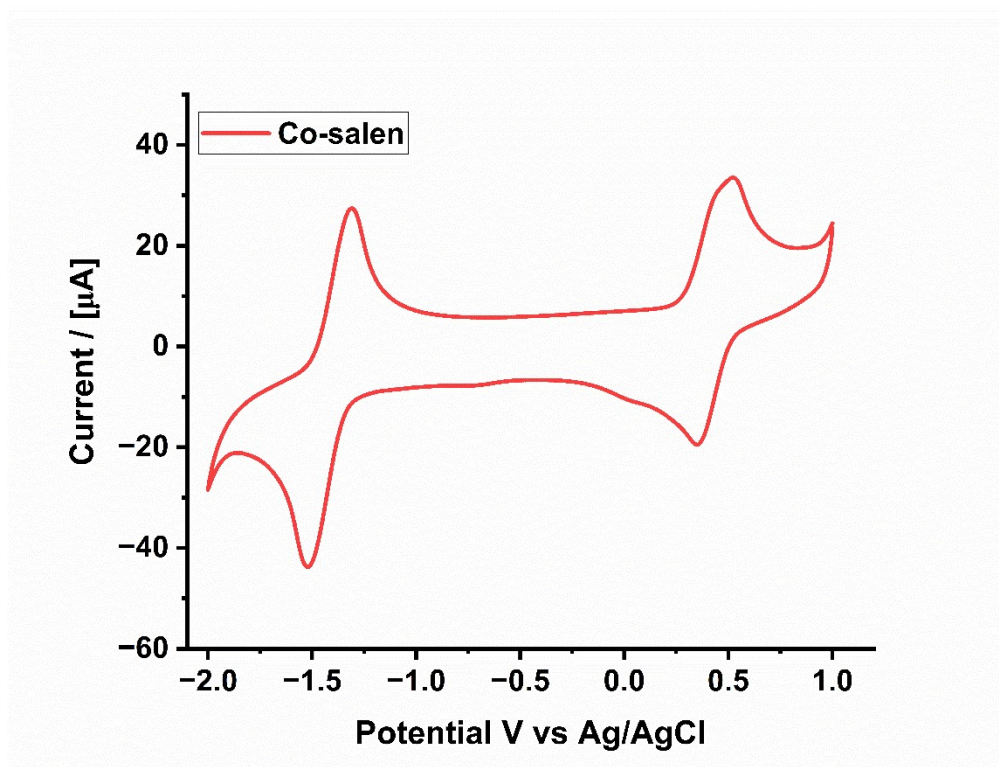

Figure S5 Cyclic voltammetry was performed in CH<sub>3</sub>CN using <sup>t</sup>Bu<sub>4</sub>NPF<sub>6</sub> (0.1 M) at 100 mV/Sec scan rate vs Ag/AgCl. Cyclic voltammetry of Co-salen.



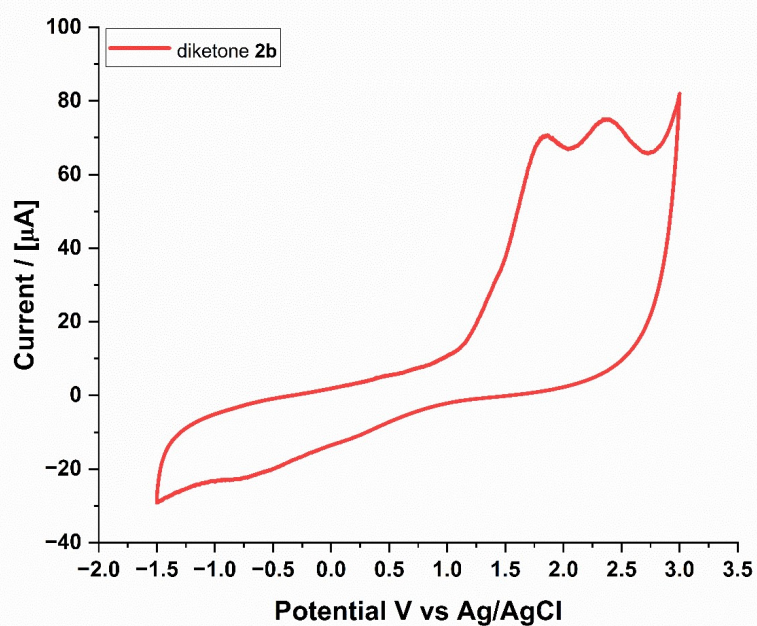

Figure S6 Cyclic voltammetry was performed in CH<sub>3</sub>CN using <sup>n</sup>Bu<sub>4</sub>NPF<sub>6</sub> (0.1 M) at 100 mV/Sec scan rate vs Ag/AgCl. Cyclic voltammetry of cyclohexane-1,3-dione **2b**

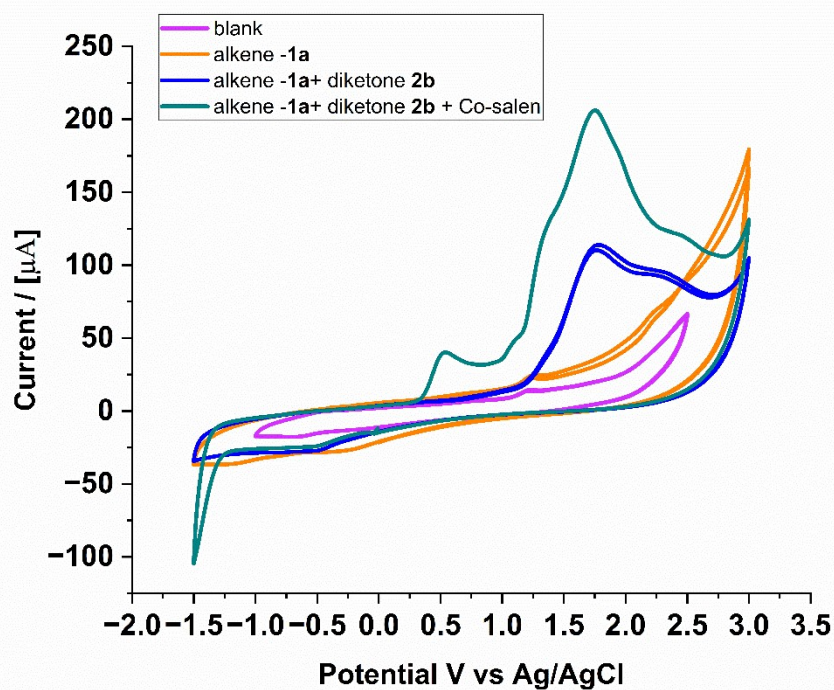

Figure S7 Cyclic voltammetry was performed in CH<sub>3</sub>CN <sup>n</sup>Bu<sub>4</sub>NPF<sub>6</sub> (0.1 M) using glassy-carbon (3 mm diameter, disc-electrode) working electrode and Pt wire counter electrode at 100 mV/Sec scan rate vs Ag/AgCl. Blank (magenta), alkene-**1a** (orange), alkene-**1a** + diketone **2b** (blue) and alkene-**1a** + diketone **2b** + Co-salen (green)

#### References:

- [1] Cruz, D. A.; Sinka, V.; de Armas, P.; Steingruber, H. S.; Fernández, I.; Martín, V. S.; Miranda, P. O.; Padrón, J. I., Iron(II) and Copper(I) Control the Total Regioselectivity in the Hydrobromination of Alkenes. *Org. Lett.* **2021**, *23*, 6105-6109.
- [2] Liang, Q.-J.; Yang, C.; Meng, F.-F.; Jiang, B.; Xu, Y.-H.; Loh, T.-P., Chelation versus Non-Chelation Control in the Stereoselective Alkenyl sp<sup>2</sup> C–H Bond Functionalization Reaction. *Angew. Chem., Int. Ed.* **2017**, *56*, 5091-5095.
- [3] García-Vázquez, V.; Hoteite, L.; Lakeland, C. P.; Watson, D. W.; Harrity, J. P. A., A Pd-Catalyzed [4 + 2] Annulation Approach to Fluorinated N-Heterocycles. *Org. Lett.* **2021**, *23*, 2811-2815.
- [4] Ginotra, S. K.; Friest, J. A.; Berkowitz, D. B., Halocarbocyclization Entry into the Oxabicyclo[4.3.1]decyl Exomethylene- $\delta$ -Lactone Cores of Linearifolin and Zaluzanin A: Exploiting Combinatorial Catalysis. *Org. Lett.* **2012**, *14*, 968-971.
- [5] Wu, F.-P.; Yuan, Y.; Schünemann, C.; Kamer, P. C. J.; Wu, X.-F., Copper-Catalyzed Regioselective Borocarbonylative Coupling of Unactivated Alkenes with Alkyl Halides: Synthesis of  $\beta$ -Boryl Ketones. *Angew. Chem., Int. Ed.* **2020**, *59*, 10451-10455.
- [6] Li, X.; He, S.; Song, Q., Diethylzinc-Mediated Radical 1,2-Addition of Alkenes and Alkynes. *Org. Lett.* **2021**, *23*, 2994-2999.
- [7] Hou, Z.-W.; Li, L.; Wang, L., Organocatalytic electrochemical amination of benzylic C–H bonds. *Org. Chem. Front.* **2021**, *8*, 4700-4705.
- [8] Horn, A.; Dussault, P. H., Synthesis of  $\alpha$ -Cyano and  $\alpha$ -Sulfonyl Cyclic Ethers via Intramolecular Reactions of Peroxides with Sulfone- and Nitrile-Stabilized Carbanions. *J. Org. Chem.* **2019**, *84*, 14611-14626.
- [9] Lamb, J. R.; Jung, Y.; Coates, G. W., Meinwald-type rearrangement of monosubstituted epoxides to methyl ketones using an [Al porphyrin]<sup>+</sup>[Co(CO)<sub>4</sub>]<sup>–</sup> catalyst. *Org. Chem. Front.* **2015**, *2*, 346-349.
- [10] Waser, J.; Gaspar, B.; Nambu, H.; Carreira, E. M., Hydrazines and Azides via the Metal-Catalyzed Hydrohydrazination and Hydroazidation of Olefins. *J. Am. Chem. Soc.* **2006**, *128*, 11693-11712.
- [11] Wu, X.; Gannett, C. N.; Liu, J.; Zeng, R.; Novaes, L. F. T.; Wang, H.; Abruña, H. D.; Lin, S., Intercepting Hydrogen Evolution with Hydrogen-Atom Transfer: Electron-Initiated Hydrofunctionalization of Alkenes. *J. Am. Chem. Soc.* **2022**, *144*, 17783-17791.

**Crystal data: 6,6-Dimethyl-2-(3-(phenylthio)propyl)-3,5,6,7-tetrahydrobenzofuran-4(2H)-one (3ra)**

A specimen of  $C_{19}H_{24}O_2S$ , approximate dimensions 0.040 mm x 0.090 mm x 0.180 mm, was used for the X-ray crystallographic analysis. The X-ray intensity data were measured ( $\lambda = 0.71073 \text{ \AA}$ ).

The integration of the data using a monoclinic unit cell yielded a total of 31647 reflections to a maximum  $\theta$  angle of  $28.72^\circ$  (0.74  $\text{\AA}$  resolution), of which 4463 were independent (average redundancy 7.091, completeness = 99.9%,  $R_{\text{int}} = 7.47\%$ ,  $R_{\text{sig}} = 4.75\%$ ) and 3384 (75.82%) were greater than  $2\sigma(F^2)$ . The final cell constants of  $a = 11.5620(8) \text{ \AA}$ ,  $b = 5.6279(4) \text{ \AA}$ ,  $c = 26.4527(18) \text{ \AA}$ ,  $\beta = 92.458(3)^\circ$ , volume =  $1719.7(2) \text{ \AA}^3$ , are based upon the refinement of the XYZ-centroids of reflections above  $20 \sigma(I)$ . The calculated minimum and maximum transmission coefficients (based on crystal size) are 0.6037 and 0.7458.

The structure was solved and refined using the Bruker SHELXTL Software Package, using the space group  $P 2_1/n$ , with  $Z = 4$  for the formula unit,  $C_{19}H_{24}O_2S$ . The final anisotropic full-matrix least-squares refinement on  $F^2$  with 201 variables converged at  $R1 = 5.19\%$ , for the observed data and  $wR2 = 13.12\%$  for all data. The goodness-of-fit was 1.031. The largest peak in the final difference electron density synthesis was  $0.929 \text{ e}/\text{\AA}^3$  and the largest hole was  $-0.407 \text{ e}/\text{\AA}^3$  with an RMS deviation of  $0.065 \text{ e}/\text{\AA}^3$ . On the basis of the final model, the calculated density was  $1.222 \text{ g}/\text{cm}^3$  and  $F(000)$ , 680 e $^-$ .

**Table 1. Sample and crystal data for RCS\_003**

|                               |                                                  |                           |
|-------------------------------|--------------------------------------------------|---------------------------|
| <b>Identification code</b>    | RCS_003                                          |                           |
| <b>Chemical formula</b>       | C <sub>19</sub> H <sub>24</sub> O <sub>2</sub> S |                           |
| <b>Formula weight</b>         | 316.44 g/mol                                     |                           |
| <b>Temperature</b>            | 100(2) K                                         |                           |
| <b>Wavelength</b>             | 0.71073 Å                                        |                           |
| <b>Crystal size</b>           | 0.040 x 0.090 x 0.180 mm                         |                           |
| <b>Crystal system</b>         | monoclinic                                       |                           |
| <b>Space group</b>            | P 21/n                                           |                           |
| <b>Unit cell dimensions</b>   | a = 11.5620(8) Å                                 | $\alpha = 90^\circ$       |
|                               | b = 5.6279(4) Å                                  | $\beta = 92.458(3)^\circ$ |
|                               | c = 26.4527(18) Å                                | $\gamma = 90^\circ$       |
| <b>Volume</b>                 | 1719.7(2) Å <sup>3</sup>                         |                           |
| <b>Z</b>                      | 4                                                |                           |
| <b>Density (calculated)</b>   | 1.222 g/cm <sup>3</sup>                          |                           |
| <b>Absorption coefficient</b> | 0.193 mm <sup>-1</sup>                           |                           |
| <b>F(000)</b>                 | 680                                              |                           |

**Table 2. Data collection and structure refinement for RCS\_003.**

|                                          |                                             |                           |
|------------------------------------------|---------------------------------------------|---------------------------|
| <b>Theta range for data collection</b>   | 1.95 to 28.72°                              |                           |
| <b>Index ranges</b>                      | -15 ≤ h ≤ 15, -7 ≤ k ≤ 7, -35 ≤ l ≤ 34      |                           |
| <b>Reflections collected</b>             | 31647                                       |                           |
| <b>Independent reflections</b>           | 4463 [R(int) = 0.0747]                      |                           |
| <b>Max. and min. transmission</b>        | 0.7458 and 0.6037                           |                           |
| <b>Structure solution technique</b>      | direct methods                              |                           |
| <b>Structure solution program</b>        | SHELXT 2018/2 (Sheldrick, 2018)             |                           |
| <b>Refinement method</b>                 | Full-matrix least-squares on F <sup>2</sup> |                           |
| <b>Refinement program</b>                | SHELXL-2018/3 (Sheldrick, 2018)             |                           |
| <b>Function minimized</b>                | $\sum w(F_o^2 - F_c^2)^2$                   |                           |
| <b>Data / restraints / parameters</b>    | 4463 / 0 / 201                              |                           |
| <b>Goodness-of-fit on F<sup>2</sup></b>  | 1.031                                       |                           |
| <b><math>\Delta/\sigma_{\max}</math></b> | 0.001                                       |                           |
| <b>Final R indices</b>                   | 3384 data; I > 2σ(I)                        | R1 = 0.0519, wR2 = 0.1167 |

|                                    |                                                                               |                           |
|------------------------------------|-------------------------------------------------------------------------------|---------------------------|
|                                    | all data                                                                      | R1 = 0.0764, wR2 = 0.1312 |
| <b>Weighting scheme</b>            | w=1/[ $\sigma^2(F_o^2)+(0.0444P)^2+1.8655P$ ]<br>where P=( $F_o^2+2F_c^2$ )/3 |                           |
| <b>Largest diff. peak and hole</b> | 0.929 and -0.407 eÅ <sup>-3</sup>                                             |                           |
| <b>R.M.S. deviation from mean</b>  | 0.065 eÅ <sup>-3</sup>                                                        |                           |

**Table 3. Atomic coordinates and equivalent isotropic atomic displacement parameters (Å<sup>2</sup>) for RCS\_003.**

U(eq) is defined as one third of the trace of the orthogonalized U<sub>ij</sub> tensor.

|      | x/a         | y/b        | z/c        | U(eq)       |
|------|-------------|------------|------------|-------------|
| S1   | 0.04810(4)  | 0.02826(9) | 0.57327(2) | 0.02416(14) |
| O1   | 0.55577(12) | 0.0399(3)  | 0.40601(5) | 0.0234(3)   |
| O2   | 0.24633(13) | 0.5449(3)  | 0.43276(5) | 0.0292(4)   |
| C1   | 0.42477(16) | 0.5942(3)  | 0.32042(7) | 0.0186(4)   |
| C2   | 0.52893(16) | 0.7113(4)  | 0.34876(8) | 0.0226(4)   |
| C3   | 0.49906(16) | 0.8612(3)  | 0.39414(7) | 0.0193(4)   |
| C4   | 0.40183(17) | 0.7810(4)  | 0.42156(7) | 0.0222(4)   |
| C5   | 0.33682(17) | 0.5968(4)  | 0.40441(7) | 0.0222(4)   |
| C6   | 0.25076(18) | 0.7070(4)  | 0.47741(7) | 0.0243(4)   |
| C7   | 0.35256(19) | 0.8786(4)  | 0.46931(8) | 0.0283(5)   |
| C8   | 0.26266(18) | 0.5525(4)  | 0.52384(8) | 0.0242(4)   |
| C009 | 0.35477(17) | 0.4524(3)  | 0.35845(7) | 0.0204(4)   |
| C9   | 0.15833(17) | 0.3877(4)  | 0.52854(7) | 0.0225(4)   |
| C10  | 0.17393(16) | 0.2196(3)  | 0.57340(7) | 0.0207(4)   |
| C11  | 0.07533(16) | 0.8337(3)  | 0.62458(7) | 0.0183(4)   |
| C12  | 0.17575(17) | 0.8340(4)  | 0.65568(7) | 0.0232(4)   |
| C13  | 0.18912(18) | 0.6661(4)  | 0.69392(8) | 0.0278(5)   |
| C14  | 0.10458(18) | 0.4973(4)  | 0.70149(8) | 0.0284(5)   |
| C15  | 0.00506(18) | 0.4967(4)  | 0.67040(8) | 0.0259(4)   |
| C16  | 0.99007(17) | 0.6640(4)  | 0.63227(7) | 0.0219(4)   |
| C17  | 0.34809(18) | 0.7823(4)  | 0.29415(8) | 0.0264(4)   |
| C18  | 0.46911(19) | 0.4248(4)  | 0.28057(8) | 0.0290(5)   |

|  | x/a | y/b | z/c | U(eq) |
|--|-----|-----|-----|-------|
|--|-----|-----|-----|-------|

**Table 4. Bond lengths (Å) for RCS\_003.**

|         |            |         |            |
|---------|------------|---------|------------|
| S1-C11  | 1.7618(19) | S1-C10  | 1.8099(19) |
| O1-C3   | 1.234(2)   | O2-C5   | 1.345(2)   |
| O2-C6   | 1.491(2)   | C1-C18  | 1.526(3)   |
| C1-C17  | 1.529(3)   | C1-C2   | 1.539(3)   |
| C1-C009 | 1.541(3)   | C2-C3   | 1.519(3)   |
| C3-C4   | 1.436(3)   | C4-C5   | 1.348(3)   |
| C4-C7   | 1.511(3)   | C5-C009 | 1.484(3)   |
| C6-C8   | 1.507(3)   | C6-C7   | 1.545(3)   |
| C8-C9   | 1.531(3)   | C9-C10  | 1.523(3)   |
| C11-C16 | 1.394(3)   | C11-C12 | 1.394(3)   |
| C12-C13 | 1.388(3)   | C13-C14 | 1.384(3)   |
| C14-C15 | 1.385(3)   | C15-C16 | 1.385(3)   |

**Table 5. Bond angles (°) for RCS\_003.**

|             |            |             |            |
|-------------|------------|-------------|------------|
| C11-S1-C10  | 104.55(9)  | C5-O2-C6    | 107.92(15) |
| C18-C1-C17  | 108.90(17) | C18-C1-C2   | 108.96(16) |
| C17-C1-C2   | 110.57(16) | C18-C1-C009 | 109.22(16) |
| C17-C1-C009 | 110.17(16) | C2-C1-C009  | 109.00(16) |
| C3-C2-C1    | 115.03(15) | O1-C3-C4    | 123.12(18) |
| O1-C3-C2    | 121.16(17) | C4-C3-C2    | 115.72(16) |
| C5-C4-C3    | 120.59(18) | C5-C4-C7    | 109.65(17) |
| C3-C4-C7    | 129.72(18) | O2-C5-C4    | 114.52(18) |
| O2-C5-C009  | 118.52(17) | C4-C5-C009  | 126.96(18) |
| O2-C6-C8    | 106.94(16) | O2-C6-C7    | 105.85(15) |
| C8-C6-C7    | 115.51(18) | C4-C7-C6    | 101.85(16) |
| C6-C8-C9    | 111.78(17) | C5-C009-C1  | 110.33(16) |
| C10-C9-C8   | 111.85(17) | C9-C10-S1   | 107.45(13) |
| C16-C11-C12 | 119.41(18) | C16-C11-S1  | 115.74(15) |
| C12-C11-S1  | 124.80(15) | C13-C12-C11 | 119.55(19) |
| C14-C13-C12 | 121.0(2)   | C13-C14-C15 | 119.29(19) |
| C16-C15-C14 | 120.38(19) | C15-C16-C11 | 120.32(19) |

**Table 6. Anisotropic atomic displacement parameters ( $\text{\AA}^2$ ) for RCS\_003.**

The anisotropic atomic displacement factor exponent takes the form:  $-2\pi^2 [ h^2 a^{*2} U_{11} + \dots + 2 h k a^* b^* U_{12} ]$

|      | $U_{11}$   | $U_{22}$   | $U_{33}$   | $U_{23}$   | $U_{13}$     | $U_{12}$   |
|------|------------|------------|------------|------------|--------------|------------|
| S1   | 0.0214(2)  | 0.0233(3)  | 0.0273(3)  | 0.0072(2)  | -0.00455(18) | -0.0051(2) |
| O1   | 0.0219(7)  | 0.0237(7)  | 0.0245(7)  | -0.0037(6) | 0.0005(5)    | -0.0076(6) |
| O2   | 0.0329(8)  | 0.0347(8)  | 0.0205(7)  | -0.0071(6) | 0.0076(6)    | -0.0157(7) |
| C1   | 0.0184(8)  | 0.0184(9)  | 0.0192(9)  | -0.0042(7) | 0.0022(7)    | -0.0013(7) |
| C2   | 0.0164(9)  | 0.0254(10) | 0.0263(10) | -0.0056(8) | 0.0035(7)    | -0.0027(8) |
| C3   | 0.0175(8)  | 0.0203(9)  | 0.0200(9)  | -0.0007(8) | -0.0016(7)   | -0.0027(7) |
| C4   | 0.0238(9)  | 0.0225(10) | 0.0204(9)  | -0.0031(8) | 0.0016(7)    | -0.0070(8) |
| C5   | 0.0223(9)  | 0.0258(10) | 0.0188(9)  | -0.0005(8) | 0.0038(7)    | -0.0058(8) |
| C6   | 0.0272(10) | 0.0257(10) | 0.0202(9)  | -0.0042(8) | 0.0041(8)    | -0.0048(8) |
| C7   | 0.0317(11) | 0.0292(11) | 0.0244(10) | -0.0045(9) | 0.0057(9)    | -0.0114(9) |
| C8   | 0.0272(10) | 0.0238(10) | 0.0217(10) | -0.0036(8) | 0.0031(8)    | -0.0052(8) |
| C009 | 0.0228(9)  | 0.0174(9)  | 0.0211(9)  | -0.0031(8) | 0.0022(7)    | -0.0042(7) |
| C9   | 0.0266(10) | 0.0219(10) | 0.0190(9)  | 0.0004(8)  | 0.0027(8)    | -0.0038(8) |
| C10  | 0.0203(9)  | 0.0176(9)  | 0.0245(10) | -0.0004(8) | 0.0031(7)    | -0.0027(7) |
| C11  | 0.0192(9)  | 0.0186(9)  | 0.0172(9)  | -0.0006(7) | 0.0013(7)    | -0.0010(7) |
| C12  | 0.0202(9)  | 0.0252(10) | 0.0241(10) | 0.0015(8)  | -0.0009(8)   | -0.0043(8) |
| C13  | 0.0235(10) | 0.0366(12) | 0.0231(10) | 0.0031(9)  | -0.0016(8)   | -0.0020(9) |
| C14  | 0.0292(10) | 0.0339(12) | 0.0224(10) | 0.0094(9)  | 0.0045(8)    | -0.0001(9) |
| C15  | 0.0265(10) | 0.0274(11) | 0.0245(10) | 0.0042(9)  | 0.0079(8)    | -0.0063(8) |
| C16  | 0.0183(9)  | 0.0262(10) | 0.0214(9)  | -0.0008(8) | 0.0011(7)    | -0.0035(8) |
| C17  | 0.0289(10) | 0.0249(10) | 0.0250(10) | 0.0004(9)  | -0.0029(8)   | 0.0003(8)  |
| C18  | 0.0295(11) | 0.0290(11) | 0.0291(11) | -0.0120(9) | 0.0100(9)    | -0.0059(9) |

**Table 7. Hydrogen atomic coordinates and isotropic atomic displacement parameters ( $\text{\AA}^2$ ) for RCS\_003.**

|     | x/a    | y/b    | z/c    | U(eq)    |
|-----|--------|--------|--------|----------|
| H2A | 0.5834 | 0.5849 | 0.3604 | 0.027000 |
| H2B | 0.5696 | 0.8130 | 0.3247 | 0.027000 |

|      | x/a     | y/b     | z/c    | U(eq)    |
|------|---------|---------|--------|----------|
| H6   | 0.1770  | 0.7995  | 0.4781 | 0.029000 |
| H7A  | 0.3252  | 1.0441  | 0.4645 | 0.034000 |
| H7B  | 0.4102  | 0.8729  | 0.4981 | 0.034000 |
| H8A  | 0.2704  | 0.6546  | 0.5543 | 0.029000 |
| H8B  | 0.3339  | 0.4556  | 0.5222 | 0.029000 |
| H00A | 0.2788  | 0.4076  | 0.3425 | 0.024000 |
| H00B | 0.3968  | 0.3047  | 0.3680 | 0.024000 |
| H9A  | 0.0879  | 0.4847  | 0.5325 | 0.027000 |
| H9B  | 0.1473  | 0.2937  | 0.4971 | 0.027000 |
| H10A | 0.1808  | 0.3109  | 0.6054 | 0.025000 |
| H10B | 0.2450  | 0.1236  | 0.5703 | 0.025000 |
| H12  | 0.2346  | -0.0517 | 0.6507 | 0.028000 |
| H13  | 0.2574  | -0.3330 | 0.7152 | 0.033000 |
| H14  | 0.1147  | -0.6171 | 0.7277 | 0.034000 |
| H15  | -0.0532 | -0.6190 | 0.6753 | 0.031000 |
| H16  | -0.0787 | -0.3370 | 0.6113 | 0.026000 |
| H17A | 0.3939  | 0.8737  | 0.2706 | 0.040000 |
| H17B | 0.3175  | 0.8893  | 0.3196 | 0.040000 |
| H17C | 0.2837  | 0.7044  | 0.2754 | 0.040000 |
| H18A | 0.5150  | 0.5138  | 0.2567 | 0.043000 |
| H18B | 0.4033  | 0.3497  | 0.2623 | 0.043000 |
| H18C | 0.5175  | 0.3022  | 0.2971 | 0.043000 |

**Crystal data:** *syn*-3,3-Dimethyl-3,4,5a,6,7,8,9,10,11,11a-decahydrocycloocta[b]benzofuran-1(2H)-one (4wa-*syn*)

A specimen of C<sub>16</sub>H<sub>24</sub>O<sub>2</sub>, approximate dimensions 0.030 mm x 0.080 mm x 0.110 mm, was used for the X-ray crystallographic analysis. The X-ray intensity data were measured ( $\lambda = 0.71073 \text{ \AA}$ ).

The total exposure time was 4.33 hours. The frames were integrated with the Bruker SAINT software package using a narrow-frame algorithm. The integration of the data using an orthorhombic unit cell yielded a total of 18011 reflections to a maximum  $\theta$  angle of 28.37° (0.75 Å resolution), of which 3472 were independent (average redundancy 5.188, completeness = 99.8%,  $R_{\text{int}} = 13.88\%$ ,  $R_{\text{sig}} = 12.10\%$ ) and 2070 (59.62%) were greater than  $2\sigma(F^2)$ . The final cell constants



of  $a = 10.399(2) \text{ \AA}$ ,  $b = 13.561(3) \text{ \AA}$ ,  $c = 9.8880(18) \text{ \AA}$ , volume =  $1394.4(5) \text{ \AA}^3$ , are based upon the refinement of the XYZ-centroids of 1935 reflections above  $2\theta$  with  $4.936^\circ < 2\theta < 42.32^\circ$ . Data were corrected for absorption effects using the Multi-Scan method (SADABS). The ratio of minimum to maximum apparent transmission was 0.801. The calculated minimum and maximum transmission coefficients (based on crystal size) are 0.9920 and 0.9980.

The structure was solved and refined using the Bruker SHELXTL Software Package, using the space group  $Pc a 21$ , with  $Z = 4$  for the formula unit,  $C_{16}H_{24}O_2$ . The final anisotropic full-matrix least-squares refinement on  $F^2$  with 166 variables converged at  $R1 = 6.37\%$ , for the observed data and  $wR2 = 13.52\%$  for all data. The goodness-of-fit was 1.033. The largest peak in the final difference electron density synthesis was  $0.282 \text{ e}/\text{\AA}^3$  and the largest hole was  $-0.251 \text{ e}/\text{\AA}^3$  with an RMS deviation of  $0.062 \text{ e}/\text{\AA}^3$ . On the basis of the final model, the calculated density was  $1.183 \text{ g}/\text{cm}^3$  and  $F(000)$ , 544 e<sup>-</sup>.

**Table 1. Sample and crystal data for RCS\_A\_024\_180124.**

|                               |                               |                     |
|-------------------------------|-------------------------------|---------------------|
| <b>Identification code</b>    | RCS_A_024_180124              |                     |
| <b>Chemical formula</b>       | $C_{16}H_{24}O_2$             |                     |
| <b>Formula weight</b>         | 248.35 g/mol                  |                     |
| <b>Temperature</b>            | 100(2) K                      |                     |
| <b>Wavelength</b>             | 0.71073 \AA                   |                     |
| <b>Crystal size</b>           | 0.030 x 0.080 x 0.110 mm      |                     |
| <b>Crystal system</b>         | orthorhombic                  |                     |
| <b>Space group</b>            | $Pc a 21$                     |                     |
| <b>Unit cell dimensions</b>   | $a = 10.399(2) \text{ \AA}$   | $\alpha = 90^\circ$ |
|                               | $b = 13.561(3) \text{ \AA}$   | $\beta = 90^\circ$  |
|                               | $c = 9.8880(18) \text{ \AA}$  | $\gamma = 90^\circ$ |
| <b>Volume</b>                 | $1394.4(5) \text{ \AA}^3$     |                     |
| <b>Z</b>                      | 4                             |                     |
| <b>Density (calculated)</b>   | $1.183 \text{ g}/\text{cm}^3$ |                     |
| <b>Absorption coefficient</b> | $0.076 \text{ mm}^{-1}$       |                     |
| <b>F(000)</b>                 | 544                           |                     |

**Table 2. Data collection and structure refinement for RCS\_A\_024\_180124.**

|                                            |                                                                    |
|--------------------------------------------|--------------------------------------------------------------------|
| <b>Theta range for data collection</b>     | 2.47 to 28.37°                                                     |
| <b>Index ranges</b>                        | $-13 \leq h \leq 13$ , $-18 \leq k \leq 17$ , $-13 \leq l \leq 13$ |
| <b>Reflections collected</b>               | 18011                                                              |
| <b>Independent reflections</b>             | 3472 [R(int) = 0.1388]                                             |
| <b>Coverage of independent reflections</b> | 99.8%                                                              |
| <b>Absorption correction</b>               | Multi-Scan                                                         |
| <b>Max. and min. transmission</b>          | 0.9980 and 0.9920                                                  |
| <b>Structure solution technique</b>        | direct methods                                                     |
| <b>Structure solution program</b>          | SHELXT 2018/2 (Sheldrick, 2018)                                    |
| <b>Refinement method</b>                   | Full-matrix least-squares on $F^2$                                 |
| <b>Refinement program</b>                  | SHELXL-2018/3 (Sheldrick, 2018)                                    |
| <b>Function minimized</b>                  | $\sum w(F_o^2 - F_c^2)^2$                                          |
| <b>Data / restraints / parameters</b>      | 3472 / 1 / 166                                                     |
| <b>Goodness-of-fit on <math>F^2</math></b> | 1.033                                                              |

|                                     |                                                                                                                                                               |                           |
|-------------------------------------|---------------------------------------------------------------------------------------------------------------------------------------------------------------|---------------------------|
| <b>Final R indices</b>              | 2070 data; I>2σ(I)                                                                                                                                            | R1 = 0.0637, wR2 = 0.1100 |
|                                     | all data                                                                                                                                                      | R1 = 0.1378, wR2 = 0.1352 |
| <b>Weighting scheme</b>             | w=1/[σ <sup>2</sup> (F <sub>o</sub> <sup>2</sup> )+(0.0447P) <sup>2</sup> +0.1240P]<br>where P=(F <sub>o</sub> <sup>2</sup> +2F <sub>c</sub> <sup>2</sup> )/3 |                           |
| <b>Absolute structure parameter</b> | -0.4(10)                                                                                                                                                      |                           |
| <b>Extinction coefficient</b>       | 0.0290(40)                                                                                                                                                    |                           |
| <b>Largest diff. peak and hole</b>  | 0.282 and -0.251 eÅ <sup>-3</sup>                                                                                                                             |                           |
| <b>R.M.S. deviation from mean</b>   | 0.062 eÅ <sup>-3</sup>                                                                                                                                        |                           |

**Table 3. Atomic coordinates and equivalent isotropic atomic displacement parameters (Å<sup>2</sup>) for RCS\_A\_024\_180124.**

U(eq) is defined as one third of the trace of the orthogonalized U<sub>ij</sub> tensor.

|     | x/a       | y/b       | z/c       | U(eq)      |
|-----|-----------|-----------|-----------|------------|
| O1  | 0.7763(3) | 0.8380(2) | 0.4220(3) | 0.0336(8)  |
| O2  | 0.3553(3) | 0.7869(2) | 0.5525(3) | 0.0271(7)  |
| C1  | 0.6598(4) | 0.8496(3) | 0.4007(4) | 0.0242(10) |
| C5  | 0.4375(4) | 0.8260(3) | 0.4607(4) | 0.0218(10) |
| C6  | 0.5612(4) | 0.8093(3) | 0.4874(4) | 0.0230(10) |
| C7  | 0.5742(4) | 0.7409(3) | 0.6083(4) | 0.0236(10) |
| C8  | 0.4353(4) | 0.7482(3) | 0.6660(5) | 0.0256(10) |
| C9  | 0.3682(4) | 0.6574(3) | 0.7150(5) | 0.0292(10) |
| C10 | 0.4042(4) | 0.6259(3) | 0.8578(5) | 0.0309(11) |
| C11 | 0.5466(4) | 0.6063(3) | 0.8796(5) | 0.0300(11) |
| C12 | 0.6013(5) | 0.5300(3) | 0.7798(5) | 0.0364(12) |
| C13 | 0.6852(5) | 0.5739(3) | 0.6673(5) | 0.0416(13) |
| C14 | 0.6207(4) | 0.6399(3) | 0.5623(5) | 0.0300(10) |
| C15 | 0.4916(4) | 0.7772(3) | 0.1635(5) | 0.0336(11) |
| C16 | 0.4387(4) | 0.9526(4) | 0.1207(5) | 0.0421(13) |
| C2  | 0.6133(4) | 0.9106(3) | 0.2833(5) | 0.0276(10) |
| C3  | 0.4813(4) | 0.8791(3) | 0.2269(4) | 0.0261(10) |
| C4  | 0.3834(4) | 0.8782(3) | 0.3429(4) | 0.0272(10) |

**Table 4. Bond lengths (Å) for RCS\_A\_024\_180124.**

|         |          |         |          |
|---------|----------|---------|----------|
| O1-C1   | 1.240(5) | O2-C5   | 1.355(5) |
| O2-C8   | 1.493(5) | C1-C6   | 1.444(6) |
| C1-C2   | 1.506(6) | C5-C6   | 1.332(6) |
| C5-C4   | 1.475(6) | C6-C7   | 1.520(6) |
| C7-C14  | 1.522(6) | C7-C8   | 1.555(6) |
| C8-C9   | 1.496(6) | C9-C10  | 1.522(6) |
| C10-C11 | 1.520(6) | C11-C12 | 1.539(6) |
| C12-C13 | 1.535(6) | C13-C14 | 1.526(6) |
| C15-C3  | 1.521(6) | C16-C3  | 1.514(6) |
| C2-C3   | 1.543(6) | C3-C4   | 1.534(6) |

**Table 5. Bond angles (°) for RCS\_A\_024\_180124.**

|             |          |             |          |
|-------------|----------|-------------|----------|
| C5-O2-C8    | 106.8(3) | O1-C1-C6    | 123.1(4) |
| O1-C1-C2    | 120.9(4) | C6-C1-C2    | 116.0(4) |
| C6-C5-O2    | 114.3(4) | C6-C5-C4    | 127.3(4) |
| O2-C5-C4    | 118.4(4) | C5-C6-C1    | 120.3(4) |
| C5-C6-C7    | 110.2(4) | C1-C6-C7    | 129.4(4) |
| C6-C7-C14   | 110.0(3) | C6-C7-C8    | 99.6(3)  |
| C14-C7-C8   | 117.5(3) | O2-C8-C9    | 105.8(3) |
| O2-C8-C7    | 105.4(3) | C9-C8-C7    | 120.0(3) |
| C8-C9-C10   | 114.6(4) | C11-C10-C9  | 114.9(4) |
| C10-C11-C12 | 112.7(4) | C13-C12-C11 | 114.5(4) |
| C14-C13-C12 | 118.1(4) | C7-C14-C13  | 117.7(4) |
| C1-C2-C3    | 114.3(4) | C16-C3-C15  | 109.5(4) |
| C16-C3-C4   | 109.2(4) | C15-C3-C4   | 110.4(4) |
| C16-C3-C2   | 109.2(3) | C15-C3-C2   | 109.8(4) |
| C4-C3-C2    | 108.8(3) | C5-C4-C3    | 110.0(3) |

**Table 6. Torsion angles (°) for RCS\_A\_024\_180124.**

|                 |           |                 |           |
|-----------------|-----------|-----------------|-----------|
| C8-O2-C5-C6     | 7.4(4)    | C8-O2-C5-C4     | -174.4(3) |
| O2-C5-C6-C1     | -177.8(3) | C4-C5-C6-C1     | 4.2(6)    |
| O2-C5-C6-C7     | 5.8(5)    | C4-C5-C6-C7     | -172.2(4) |
| O1-C1-C6-C5     | 178.6(4)  | C2-C1-C6-C5     | 0.8(5)    |
| O1-C1-C6-C7     | -5.9(7)   | C2-C1-C6-C7     | 176.3(4)  |
| C5-C6-C7-C14    | 108.7(4)  | C1-C6-C7-C14    | -67.2(5)  |
| C5-C6-C7-C8     | -15.4(4)  | C1-C6-C7-C8     | 168.7(4)  |
| C5-O2-C8-C9     | -145.0(3) | C5-O2-C8-C7     | -17.0(4)  |
| C6-C7-C8-O2     | 18.8(4)   | C14-C7-C8-O2    | -99.9(4)  |
| C6-C7-C8-C9     | 137.8(4)  | C14-C7-C8-C9    | 19.1(6)   |
| O2-C8-C9-C10    | -159.6(3) | C7-C8-C9-C10    | 81.6(5)   |
| C8-C9-C10-C11   | -57.7(5)  | C9-C10-C11-C12  | -55.2(5)  |
| C10-C11-C12-C13 | 105.4(5)  | C11-C12-C13-C14 | -66.8(6)  |
| C6-C7-C14-C13   | 158.4(4)  | C8-C7-C14-C13   | -88.7(5)  |
| C12-C13-C14-C7  | 69.9(6)   | O1-C1-C2-C3     | 151.2(4)  |
| C6-C1-C2-C3     | -31.0(5)  | C1-C2-C3-C16    | 173.6(4)  |
| C1-C2-C3-C15    | -66.3(5)  | C1-C2-C3-C4     | 54.5(5)   |
| C6-C5-C4-C3     | 21.0(5)   | O2-C5-C4-C3     | -157.0(3) |
| C16-C3-C4-C5    | -166.5(4) | C15-C3-C4-C5    | 73.1(4)   |
| C2-C3-C4-C5     | -47.4(4)  |                 |           |

**Table 7. Anisotropic atomic displacement parameters (Å<sup>2</sup>) for RCS\_A\_024\_180124.**

The anisotropic atomic displacement factor exponent takes the form:  $-2\pi^2 [ h^2 a^{*2} U_{11} + \dots + 2 h k a^* b^* U_{12} ]$

|  |                       |                       |                       |                       |                       |                       |
|--|-----------------------|-----------------------|-----------------------|-----------------------|-----------------------|-----------------------|
|  | <b>U<sub>11</sub></b> | <b>U<sub>22</sub></b> | <b>U<sub>33</sub></b> | <b>U<sub>23</sub></b> | <b>U<sub>13</sub></b> | <b>U<sub>12</sub></b> |
|--|-----------------------|-----------------------|-----------------------|-----------------------|-----------------------|-----------------------|

|     | U <sub>11</sub> | U <sub>22</sub> | U <sub>33</sub> | U <sub>23</sub> | U <sub>13</sub> | U <sub>12</sub> |
|-----|-----------------|-----------------|-----------------|-----------------|-----------------|-----------------|
| O1  | 0.0150(17)      | 0.0453(17)      | 0.0405(19)      | 0.0054(16)      | -0.0032(14)     | -0.0001(14)     |
| O2  | 0.0152(15)      | 0.0355(16)      | 0.0307(16)      | 0.0069(14)      | 0.0024(14)      | 0.0041(14)      |
| C1  | 0.018(2)        | 0.026(2)        | 0.028(2)        | -0.003(2)       | -0.001(2)       | -0.0016(18)     |
| C5  | 0.016(2)        | 0.022(2)        | 0.027(3)        | -0.0001(19)     | 0.0024(19)      | -0.0014(18)     |
| C6  | 0.015(2)        | 0.024(2)        | 0.030(3)        | -0.0046(19)     | 0.002(2)        | 0.0024(17)      |
| C7  | 0.014(2)        | 0.030(2)        | 0.027(2)        | -0.001(2)       | -0.0004(19)     | 0.0009(18)      |
| C8  | 0.020(2)        | 0.030(2)        | 0.027(2)        | 0.000(2)        | 0.000(2)        | 0.0013(19)      |
| C9  | 0.014(2)        | 0.034(2)        | 0.040(3)        | 0.006(2)        | -0.003(2)       | 0.0007(19)      |
| C10 | 0.023(3)        | 0.034(3)        | 0.037(3)        | 0.004(2)        | -0.002(2)       | -0.003(2)       |
| C11 | 0.024(3)        | 0.035(3)        | 0.032(3)        | 0.004(2)        | -0.005(2)       | -0.004(2)       |
| C12 | 0.030(3)        | 0.036(3)        | 0.044(3)        | 0.012(2)        | -0.005(2)       | 0.012(2)        |
| C13 | 0.034(3)        | 0.045(3)        | 0.046(3)        | 0.012(3)        | 0.002(2)        | 0.016(2)        |
| C14 | 0.025(3)        | 0.032(2)        | 0.033(3)        | 0.000(2)        | -0.002(2)       | 0.003(2)        |
| C15 | 0.024(3)        | 0.048(3)        | 0.029(2)        | -0.006(2)       | 0.002(2)        | -0.012(2)       |
| C16 | 0.020(3)        | 0.060(3)        | 0.047(3)        | 0.015(3)        | 0.000(2)        | -0.002(2)       |
| C2  | 0.018(2)        | 0.032(2)        | 0.032(2)        | -0.001(2)       | 0.001(2)        | -0.003(2)       |
| C3  | 0.016(2)        | 0.037(3)        | 0.025(2)        | 0.006(2)        | -0.0041(19)     | -0.0044(19)     |
| C4  | 0.014(2)        | 0.030(2)        | 0.037(3)        | 0.002(2)        | -0.003(2)       | 0.0006(18)      |

**Table 8. Hydrogen atomic coordinates and isotropic atomic displacement parameters (Å<sup>2</sup>) for RCS\_A\_024\_180124.**

|      | x/a    | y/b    | z/c    | U(eq)    |
|------|--------|--------|--------|----------|
| H7   | 0.6365 | 0.7694 | 0.6746 | 0.028000 |
| H8   | 0.4351 | 0.7980 | 0.7406 | 0.031000 |
| H9A  | 0.3878 | 0.6026 | 0.6522 | 0.035000 |
| H9B  | 0.2742 | 0.6690 | 0.7115 | 0.035000 |
| H10A | 0.3764 | 0.6780 | 0.9215 | 0.037000 |
| H10B | 0.3558 | 0.5652 | 0.8804 | 0.037000 |
| H11A | 0.5599 | 0.5823 | 0.9732 | 0.036000 |
| H11B | 0.5945 | 0.6690 | 0.8696 | 0.036000 |
| H12A | 0.6531 | 0.4815 | 0.8311 | 0.044000 |
| H12B | 0.5288 | 0.4940 | 0.7377 | 0.044000 |
| H13A | 0.7547 | 0.6124 | 0.7107 | 0.050000 |
| H13B | 0.7266 | 0.5185 | 0.6186 | 0.050000 |
| H14A | 0.6822 | 0.6499 | 0.4871 | 0.036000 |
| H14B | 0.5460 | 0.6038 | 0.5250 | 0.036000 |
| H15A | 0.4079 | 0.7580 | 0.1264 | 0.050000 |
| H15B | 0.5180 | 0.7294 | 0.2326 | 0.050000 |
| H15C | 0.5556 | 0.7785 | 0.0908 | 0.050000 |
| H16A | 0.4993 | 0.9517 | 0.0449 | 0.063000 |
| H16B | 0.4364 | 1.0188 | 0.1604 | 0.063000 |
| H16C | 0.3527 | 0.9349 | 0.0882 | 0.063000 |
| H2A  | 0.6776 | 0.9067 | 0.2097 | 0.033000 |
| H2B  | 0.6081 | 0.9804 | 0.3123 | 0.033000 |

|     | <b>x/a</b> | <b>y/b</b> | <b>z/c</b> | <b>U(eq)</b> |
|-----|------------|------------|------------|--------------|
| H4A | 0.3615     | 0.9467     | 0.3685     | 0.033000     |
| H4B | 0.3036     | 0.8449     | 0.3130     | 0.033000     |

**Crystal data: 7,7-Dimethyl-4b,6,7,8,9b,10-hexahydro-9H-indeno[1,2-b]benzofuran-9-one (4ya)**

A specimen of C<sub>17</sub>H<sub>18</sub>O<sub>2</sub> was used for the X-ray crystallographic analysis. The X-ray intensity data were measured ( $\lambda = 1.54178 \text{ \AA}$ ).

The integration of the data using a monoclinic unit cell yielded a total of 36903 reflections to a maximum  $\theta$  angle of  $74.73^\circ$  ( $0.80 \text{ \AA}$  resolution), of which 2669 were independent (average redundancy 13.827, completeness = 99.4%,  $R_{\text{int}} = 5.88\%$ ,  $R_{\text{sig}} = 2.54\%$ ) and 2334 (87.45%) were greater than  $2\sigma(F^2)$ . The final cell constants of  $a = 11.0571(5) \text{ \AA}$ ,  $b = 10.1834(5) \text{ \AA}$ ,  $c = 11.8525(6) \text{ \AA}$ ,  $\beta = 102.100(2)^\circ$ , volume =  $1304.93(11) \text{ \AA}^3$ , are based upon the refinement of the XYZ-centroids of reflections above 20  $\sigma(I)$ .

The structure was solved and refined using the Bruker SHELXTL Software Package, using the space group P 21/c, with  $Z = 4$  for the formula unit, C<sub>17</sub>H<sub>18</sub>O<sub>2</sub>. The final anisotropic full-matrix least-squares refinement on  $F^2$  with 174 variables converged at  $R1 = 3.94\%$ , for the observed data and  $wR2 = 12.57\%$  for all data. The goodness-of-fit was 1.180. The largest peak in the final difference electron density synthesis was  $0.340 \text{ e}/\text{\AA}^3$  and the largest hole was  $-0.360 \text{ e}/\text{\AA}^3$  with an RMS deviation of  $0.106 \text{ e}/\text{\AA}^3$ . On the basis of the final model, the calculated density was  $1.294 \text{ g/cm}^3$  and  $F(000)$ , 544 e<sup>-</sup>.

**Table 1. Sample and crystal data for SMS\_11\_18.**

|                             |                                                |                            |
|-----------------------------|------------------------------------------------|----------------------------|
| <b>Identification code</b>  | SMS_11_18                                      |                            |
| <b>Chemical formula</b>     | C <sub>17</sub> H <sub>18</sub> O <sub>2</sub> |                            |
| <b>Formula weight</b>       | 254.31 g/mol                                   |                            |
| <b>Temperature</b>          | 100(2) K                                       |                            |
| <b>Wavelength</b>           | 1.54178 $\text{\AA}$                           |                            |
| <b>Crystal system</b>       | monoclinic                                     |                            |
| <b>Space group</b>          | P 21/c                                         |                            |
| <b>Unit cell dimensions</b> | $a = 11.0571(5) \text{ \AA}$                   | $\alpha = 90^\circ$        |
|                             | $b = 10.1834(5) \text{ \AA}$                   | $\beta = 102.100(2)^\circ$ |
|                             | $c = 11.8525(6) \text{ \AA}$                   | $\gamma = 90^\circ$        |
| <b>Volume</b>               | $1304.93(11) \text{ \AA}^3$                    |                            |

|                               |                         |
|-------------------------------|-------------------------|
| <b>Z</b>                      | 4                       |
| <b>Density (calculated)</b>   | 1.294 g/cm <sup>3</sup> |
| <b>Absorption coefficient</b> | 0.658 mm <sup>-1</sup>  |
| <b>F(000)</b>                 | 544                     |

**Table 2. Data collection and structure refinement for SMS\_11\_18.**

|                                         |                                                                                                                                                               |                           |
|-----------------------------------------|---------------------------------------------------------------------------------------------------------------------------------------------------------------|---------------------------|
| <b>Theta range for data collection</b>  | 4.09 to 74.73°                                                                                                                                                |                           |
| <b>Index ranges</b>                     | -13<=h<=13, -12<=k<=12, -14<=l<=14                                                                                                                            |                           |
| <b>Reflections collected</b>            | 36903                                                                                                                                                         |                           |
| <b>Independent reflections</b>          | 2669 [R(int) = 0.0588]                                                                                                                                        |                           |
| <b>Structure solution technique</b>     | direct methods                                                                                                                                                |                           |
| <b>Structure solution program</b>       | SHELXT 2014/5 (Sheldrick, 2014)                                                                                                                               |                           |
| <b>Refinement method</b>                | Full-matrix least-squares on F <sup>2</sup>                                                                                                                   |                           |
| <b>Refinement program</b>               | SHELXL-2018/3 (Sheldrick, 2018)                                                                                                                               |                           |
| <b>Function minimized</b>               | $\Sigma w(F_o^2 - F_c^2)^2$                                                                                                                                   |                           |
| <b>Data / restraints / parameters</b>   | 2669 / 0 / 174                                                                                                                                                |                           |
| <b>Goodness-of-fit on F<sup>2</sup></b> | 1.180                                                                                                                                                         |                           |
| <b>Final R indices</b>                  | 2334<br>data;<br>I>2σ(I)                                                                                                                                      | R1 = 0.0394, wR2 = 0.1105 |
|                                         | all data                                                                                                                                                      | R1 = 0.0484, wR2 = 0.1257 |
| <b>Weighting scheme</b>                 | w=1/[σ <sup>2</sup> (F <sub>o</sub> <sup>2</sup> )+(0.0663P) <sup>2</sup> +0.4528P]<br>where P=(F <sub>o</sub> <sup>2</sup> +2F <sub>c</sub> <sup>2</sup> )/3 |                           |
| <b>Largest diff. peak and hole</b>      | 0.340 and -0.360 eÅ <sup>-3</sup>                                                                                                                             |                           |
| <b>R.M.S. deviation from mean</b>       | 0.106 eÅ <sup>-3</sup>                                                                                                                                        |                           |

**Table 3. Atomic coordinates and equivalent isotropic atomic displacement parameters (Å<sup>2</sup>) for SMS\_11\_18.**

U(eq) is defined as one third of the trace of the orthogonalized U<sub>ij</sub> tensor.

|      | <b>x/a</b>  | <b>y/b</b>  | <b>z/c</b>  | <b>U(eq)</b> |
|------|-------------|-------------|-------------|--------------|
| O001 | 0.50145(9)  | 0.68264(10) | 0.51516(8)  | 0.0220(3)    |
| O002 | 0.26117(8)  | 0.45969(9)  | 0.72828(8)  | 0.0173(2)    |
| C003 | 0.10256(11) | 0.69444(13) | 0.54473(11) | 0.0166(3)    |

|      | x/a         | y/b         | z/c         | U(eq)     |
|------|-------------|-------------|-------------|-----------|
| C004 | 0.37940(11) | 0.56760(12) | 0.62278(11) | 0.0150(3) |
| C005 | 0.02869(12) | 0.80620(13) | 0.53881(11) | 0.0198(3) |
| C006 | 0.46713(11) | 0.52361(13) | 0.83434(10) | 0.0154(3) |
| C007 | 0.48896(12) | 0.63625(13) | 0.60792(11) | 0.0162(3) |
| C008 | 0.37074(11) | 0.51874(12) | 0.72601(11) | 0.0145(3) |
| C009 | 0.59670(11) | 0.54449(13) | 0.80709(10) | 0.0152(3) |
| C00A | 0.64438(12) | 0.41839(13) | 0.76098(11) | 0.0183(3) |
| C00B | 0.09156(11) | 0.59435(13) | 0.62181(11) | 0.0170(3) |
| C00C | 0.00812(12) | 0.60418(15) | 0.69442(12) | 0.0209(3) |
| C00D | 0.19616(12) | 0.66097(14) | 0.47344(11) | 0.0187(3) |
| C00E | 0.94564(12) | 0.81625(14) | 0.61142(12) | 0.0219(3) |
| C00F | 0.58799(12) | 0.65504(13) | 0.71690(11) | 0.0172(3) |
| C00G | 0.68748(12) | 0.58561(14) | 0.91713(11) | 0.0200(3) |
| C00H | 0.18012(11) | 0.48417(13) | 0.61436(11) | 0.0169(3) |
| C00I | 0.93577(12) | 0.71654(15) | 0.68927(12) | 0.0230(3) |
| C00J | 0.26313(12) | 0.53834(13) | 0.53404(11) | 0.0164(3) |

**Table 4. Bond lengths (Å) for SMS\_11\_18.**

|           |            |           |            |
|-----------|------------|-----------|------------|
| O001-C007 | 1.2308(16) | O002-C008 | 1.3578(15) |
| O002-C00H | 1.4768(15) | C003-C00B | 1.3909(19) |
| C003-C005 | 1.3940(19) | C003-C00D | 1.5059(18) |
| C004-C008 | 1.3427(18) | C004-C007 | 1.4411(18) |
| C004-C00J | 1.5102(16) | C005-C00E | 1.388(2)   |
| C005-H005 | 0.950000   | C006-C008 | 1.4877(17) |
| C006-C009 | 1.5479(17) | C006-H00A | 0.990000   |
| C006-H00B | 0.990000   | C007-C00F | 1.5202(17) |
| C009-C00G | 1.5281(17) | C009-C00A | 1.5318(18) |
| C009-C00F | 1.5416(17) | C00A-H00C | 0.980000   |
| C00A-H00D | 0.980000   | C00A-H00E | 0.980000   |
| C00B-C00C | 1.3909(19) | C00B-C00H | 1.5040(18) |
| C00C-C00I | 1.390(2)   | C00C-H00F | 0.950000   |

|           |            |           |          |
|-----------|------------|-----------|----------|
| C00D-C00J | 1.5494(18) | C00D-H00G | 0.990000 |
| C00D-H00H | 0.990000   | C00E-C00I | 1.392(2) |
| C00E-H00I | 0.950000   | C00F-H00J | 0.990000 |
| C00F-H00K | 0.990000   | C00G-H00L | 0.980000 |
| C00G-H00M | 0.980000   | C00G-H00N | 0.980000 |
| C00H-C00J | 1.5554(18) | C00H-H00O | 1.000000 |
| C00I-H00P | 0.950000   | C00J-H00Q | 1.000000 |

**Table 5. Bond angles (°) for SMS\_11\_18.**

|                |            |                |            |
|----------------|------------|----------------|------------|
| C008-O002-C00H | 106.26(9)  | C00B-C003-C005 | 120.02(12) |
| C00B-C003-C00D | 111.57(11) | C005-C003-C00D | 128.38(12) |
| C008-C004-C007 | 120.89(11) | C008-C004-C00J | 110.41(11) |
| C007-C004-C00J | 128.70(11) | C00E-C005-C003 | 119.07(13) |
| C00E-C005-H005 | 120.500000 | C003-C005-H005 | 120.500000 |
| C008-C006-C009 | 110.58(10) | C008-C006-H00A | 109.500000 |
| C009-C006-H00A | 109.500000 | C008-C006-H00B | 109.500000 |
| C009-C006-H00B | 109.500000 | H00A-C006-H00B | 108.100000 |
| O001-C007-C004 | 123.36(12) | O001-C007-C00F | 120.99(12) |
| C004-C007-C00F | 115.57(11) | C004-C008-O002 | 114.61(11) |
| C004-C008-C006 | 126.80(11) | O002-C008-C006 | 118.58(11) |
| C00G-C009-C00A | 108.70(11) | C00G-C009-C00F | 109.03(11) |
| C00A-C009-C00F | 109.93(10) | C00G-C009-C006 | 109.31(10) |
| C00A-C009-C006 | 111.23(11) | C00F-C009-C006 | 108.61(10) |
| C009-C00A-H00C | 109.500000 | C009-C00A-H00D | 109.500000 |
| H00C-C00A-H00D | 109.500000 | C009-C00A-H00E | 109.500000 |
| H00C-C00A-H00E | 109.500000 | H00D-C00A-H00E | 109.500000 |
| C00C-C00B-C003 | 120.95(12) | C00C-C00B-C00H | 127.92(12) |
| C003-C00B-C00H | 111.13(11) | C00I-C00C-C00B | 118.84(13) |
| C00I-C00C-H00F | 120.600000 | C00B-C00C-H00F | 120.600000 |
| C003-C00D-C00J | 103.90(10) | C003-C00D-H00G | 111.000000 |
| C00J-C00D-H00G | 111.000000 | C003-C00D-H00H | 111.000000 |
| C00J-C00D-H00H | 111.000000 | H00G-C00D-H00H | 109.000000 |



|                |            |                |            |
|----------------|------------|----------------|------------|
| C005-C00E-C00I | 120.76(13) | C005-C00E-H00I | 119.600000 |
| C00I-C00E-H00I | 119.600000 | C007-C00F-C009 | 115.24(10) |
| C007-C00F-H00J | 108.500000 | C009-C00F-H00J | 108.500000 |
| C007-C00F-H00K | 108.500000 | C009-C00F-H00K | 108.500000 |
| H00J-C00F-H00K | 107.500000 | C009-C00G-H00L | 109.500000 |
| C009-C00G-H00M | 109.500000 | H00L-C00G-H00M | 109.500000 |
| C009-C00G-H00N | 109.500000 | H00L-C00G-H00N | 109.500000 |
| H00M-C00G-H00N | 109.500000 | O002-C00H-C00B | 110.49(10) |
| O002-C00H-C00J | 107.26(10) | C00B-C00H-C00J | 104.26(10) |
| O002-C00H-H00O | 111.500000 | C00B-C00H-H00O | 111.500000 |
| C00J-C00H-H00O | 111.500000 | C00C-C00I-C00E | 120.35(13) |
| C00C-C00I-H00P | 119.800000 | C00E-C00I-H00P | 119.800000 |
| C004-C00J-C00D | 114.72(11) | C004-C00J-C00H | 99.73(10)  |
| C00D-C00J-C00H | 106.47(10) | C004-C00J-H00Q | 111.700000 |
| C00D-C00J-H00Q | 111.700000 | C00H-C00J-H00Q | 111.700000 |

**Table 6. Anisotropic atomic displacement parameters ( $\text{\AA}^2$ ) for SMS\_11\_18.**

The anisotropic atomic displacement factor exponent takes the form:  $-2\pi^2 [ h^2 a^{*2} U_{11} + \dots + 2 h k a^* b^* U_{12} ]$

|      | $U_{11}$  | $U_{22}$  | $U_{33}$  | $U_{23}$   | $U_{13}$   | $U_{12}$   |
|------|-----------|-----------|-----------|------------|------------|------------|
| O001 | 0.0213(5) | 0.0258(5) | 0.0193(5) | 0.0046(4)  | 0.0051(4)  | -0.0020(4) |
| O002 | 0.0113(4) | 0.0188(5) | 0.0210(5) | 0.0036(4)  | 0.0018(4)  | -0.0014(4) |
| C003 | 0.0135(6) | 0.0182(7) | 0.0163(6) | -0.0025(5) | -0.0013(5) | -0.0012(5) |
| C004 | 0.0137(6) | 0.0149(6) | 0.0155(6) | -0.0015(5) | 0.0013(5)  | 0.0009(5)  |
| C005 | 0.0183(6) | 0.0185(7) | 0.0196(6) | -0.0006(5) | -0.0029(5) | 0.0014(5)  |
| C006 | 0.0155(6) | 0.0162(6) | 0.0147(6) | 0.0004(4)  | 0.0035(5)  | 0.0003(5)  |
| C007 | 0.0169(6) | 0.0136(6) | 0.0183(6) | -0.0004(5) | 0.0041(5)  | 0.0019(5)  |
| C008 | 0.0126(6) | 0.0114(6) | 0.0200(6) | -0.0015(5) | 0.0041(5)  | 0.0005(5)  |
| C009 | 0.0132(6) | 0.0173(7) | 0.0148(6) | -0.0006(5) | 0.0019(5)  | -0.0002(5) |
| C00A | 0.0167(6) | 0.0196(7) | 0.0187(6) | 0.0000(5)  | 0.0040(5)  | 0.0017(5)  |
| C00B | 0.0120(6) | 0.0176(7) | 0.0194(6) | -0.0016(5) | -0.0013(5) | -0.0015(5) |
| C00C | 0.0140(6) | 0.0267(7) | 0.0211(6) | 0.0022(5)  | 0.0016(5)  | -0.0022(5) |
| C00D | 0.0169(6) | 0.0217(7) | 0.0167(6) | 0.0008(5)  | 0.0016(5)  | 0.0026(5)  |

|      | $U_{11}$  | $U_{22}$  | $U_{33}$  | $U_{23}$   | $U_{13}$   | $U_{12}$   |
|------|-----------|-----------|-----------|------------|------------|------------|
| C00E | 0.0164(6) | 0.0236(7) | 0.0229(7) | -0.0062(5) | -0.0026(5) | 0.0059(6)  |
| C00F | 0.0146(6) | 0.0164(6) | 0.0201(6) | 0.0003(5)  | 0.0022(5)  | -0.0030(5) |
| C00G | 0.0160(6) | 0.0256(7) | 0.0172(6) | -0.0024(5) | 0.0006(5)  | -0.0005(5) |
| C00H | 0.0129(6) | 0.0163(6) | 0.0198(6) | -0.0006(5) | -0.0007(5) | -0.0012(5) |
| C00I | 0.0140(6) | 0.0323(8) | 0.0222(7) | -0.0039(6) | 0.0030(5)  | 0.0021(6)  |
| C00J | 0.0140(6) | 0.0177(6) | 0.0168(6) | -0.0025(5) | 0.0017(5)  | 0.0003(5)  |

**Table 7. Hydrogen atomic coordinates and isotropic atomic displacement parameters ( $\text{\AA}^2$ ) for SMS\_11\_18.**

|      | $x/a$   | $y/b$  | $z/c$  | $U(\text{eq})$ |
|------|---------|--------|--------|----------------|
| H005 | 0.0351  | 0.8745 | 0.4858 | 0.024000       |
| H00A | 0.4663  | 0.4405 | 0.8774 | 0.018000       |
| H00B | 0.4487  | 0.5963 | 0.8835 | 0.018000       |
| H00C | 0.5888  | 0.3931 | 0.6885 | 0.027000       |
| H00D | 0.6472  | 0.3479 | 0.8177 | 0.027000       |
| H00E | 0.7276  | 0.4335 | 0.7472 | 0.027000       |
| H00F | 0.0007  | 0.5353 | 0.7466 | 0.025000       |
| H00G | 0.2549  | 0.7343 | 0.4734 | 0.022000       |
| H00H | 0.1550  | 0.6408 | 0.3928 | 0.022000       |
| H00I | -0.1051 | 0.8921 | 0.6079 | 0.026000       |
| H00J | 0.5719  | 0.7388 | 0.7535 | 0.021000       |
| H00K | 0.6692  | 0.6632 | 0.6947 | 0.021000       |
| H00L | 0.7689  | 0.6018 | 0.8996 | 0.030000       |
| H00M | 0.6940  | 0.5154 | 0.9747 | 0.030000       |
| H00N | 0.6577  | 0.6660 | 0.9477 | 0.030000       |
| H00O | 0.1355  | 0.4027 | 0.5820 | 0.020000       |
| H00P | -0.1207 | 0.7253 | 0.7392 | 0.028000       |
| H00Q | 0.2779  | 0.4709 | 0.4771 | 0.020000       |

# <sup>1</sup>H and <sup>13</sup>C NMR Spectra

1a

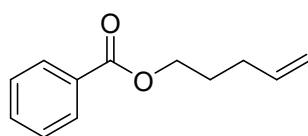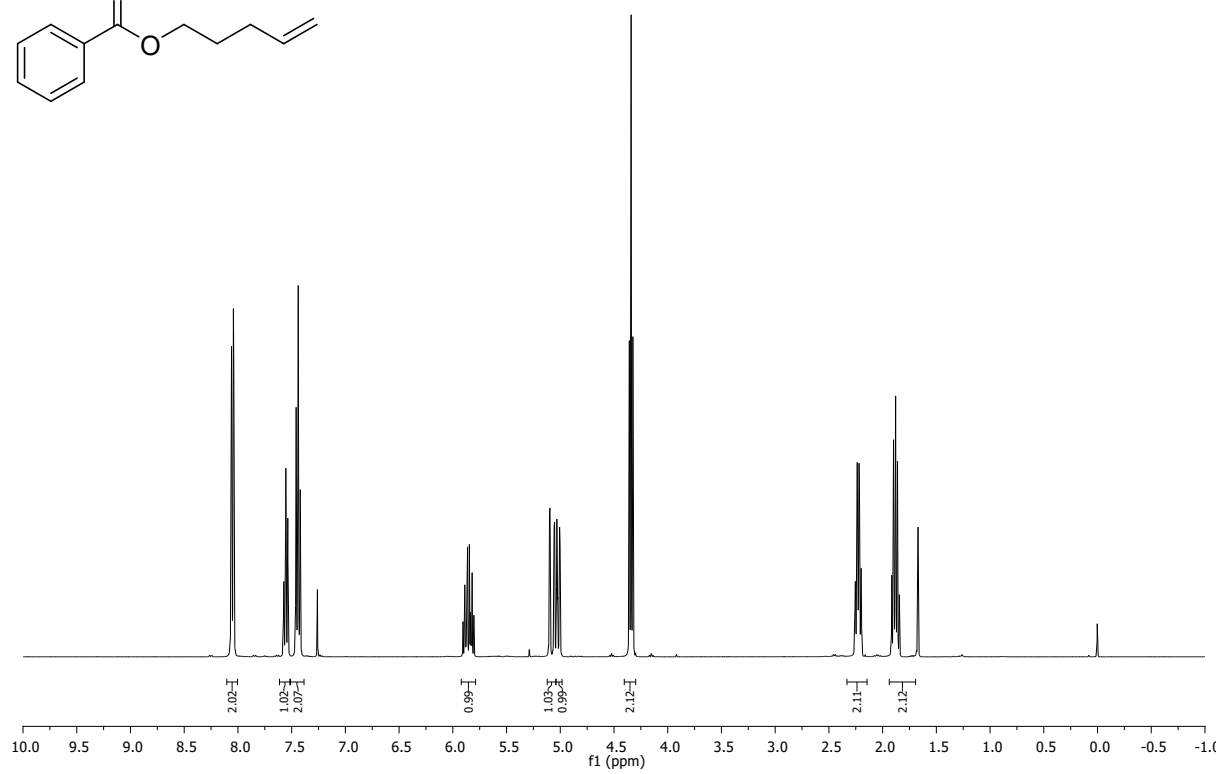

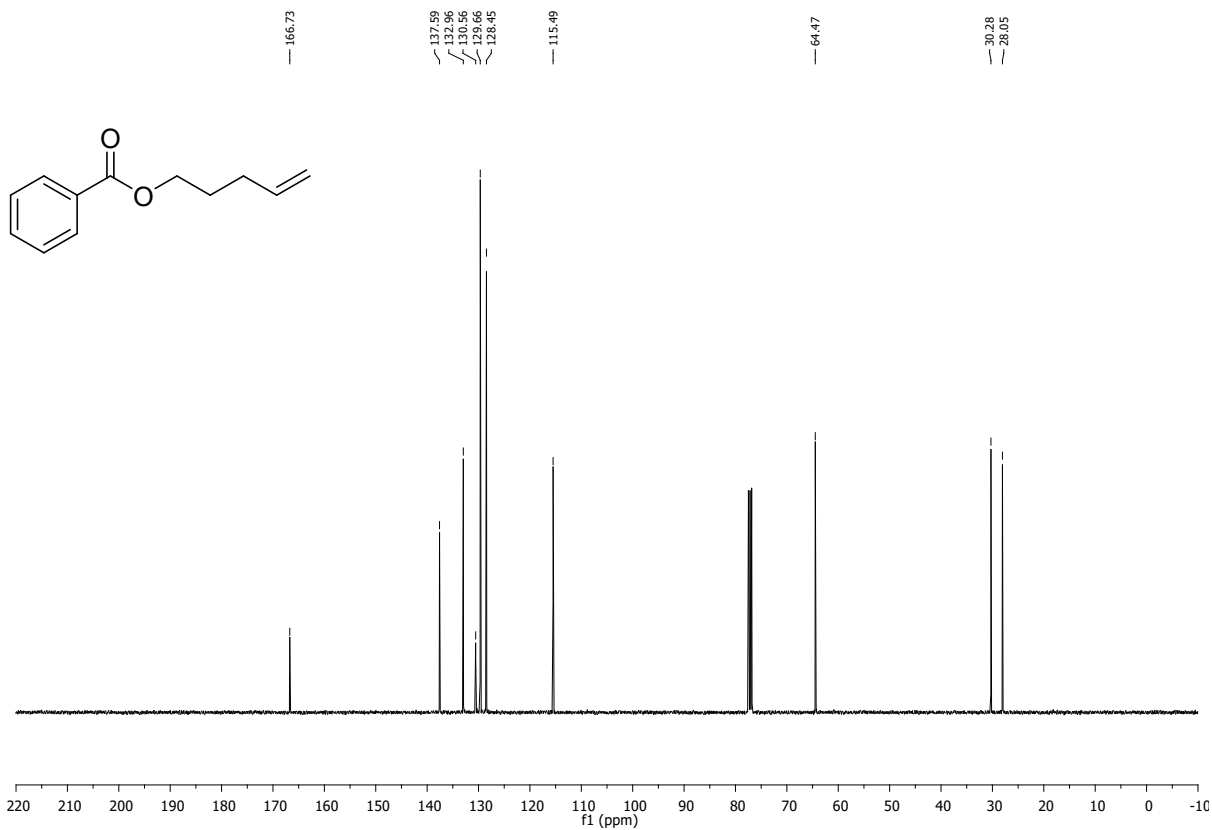

**1a'**

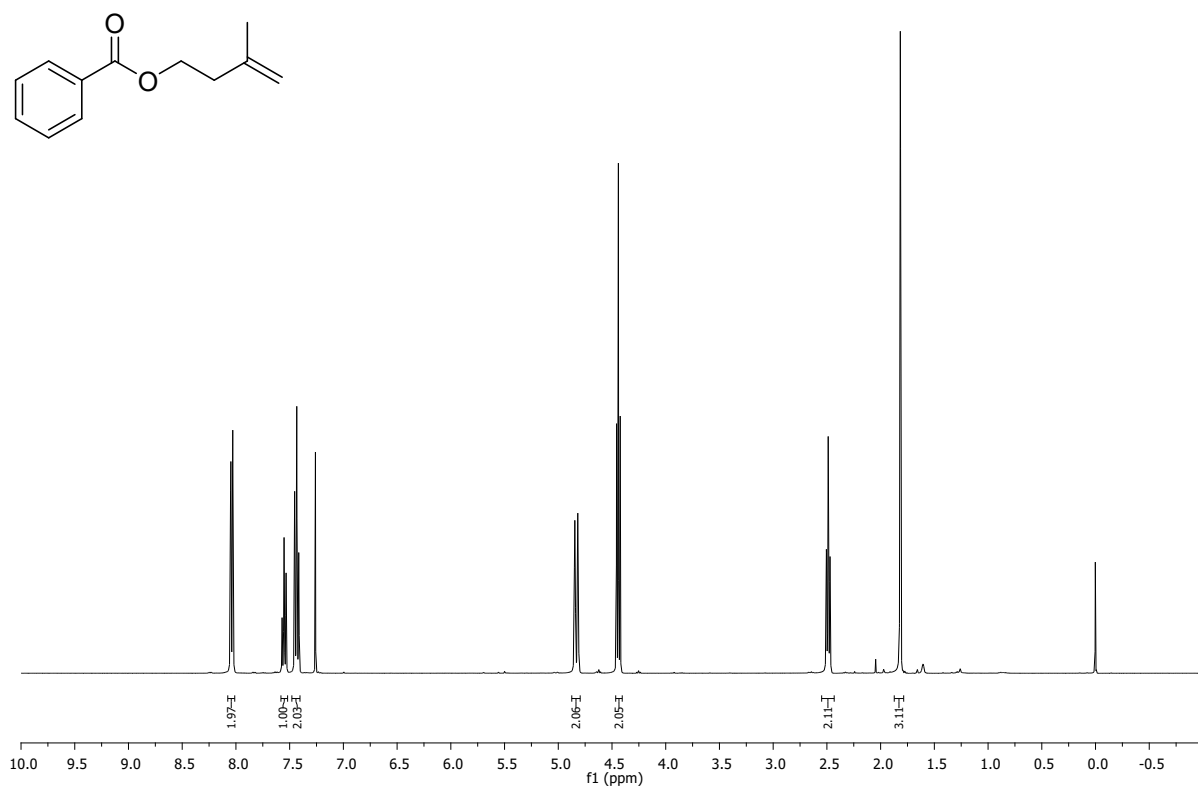

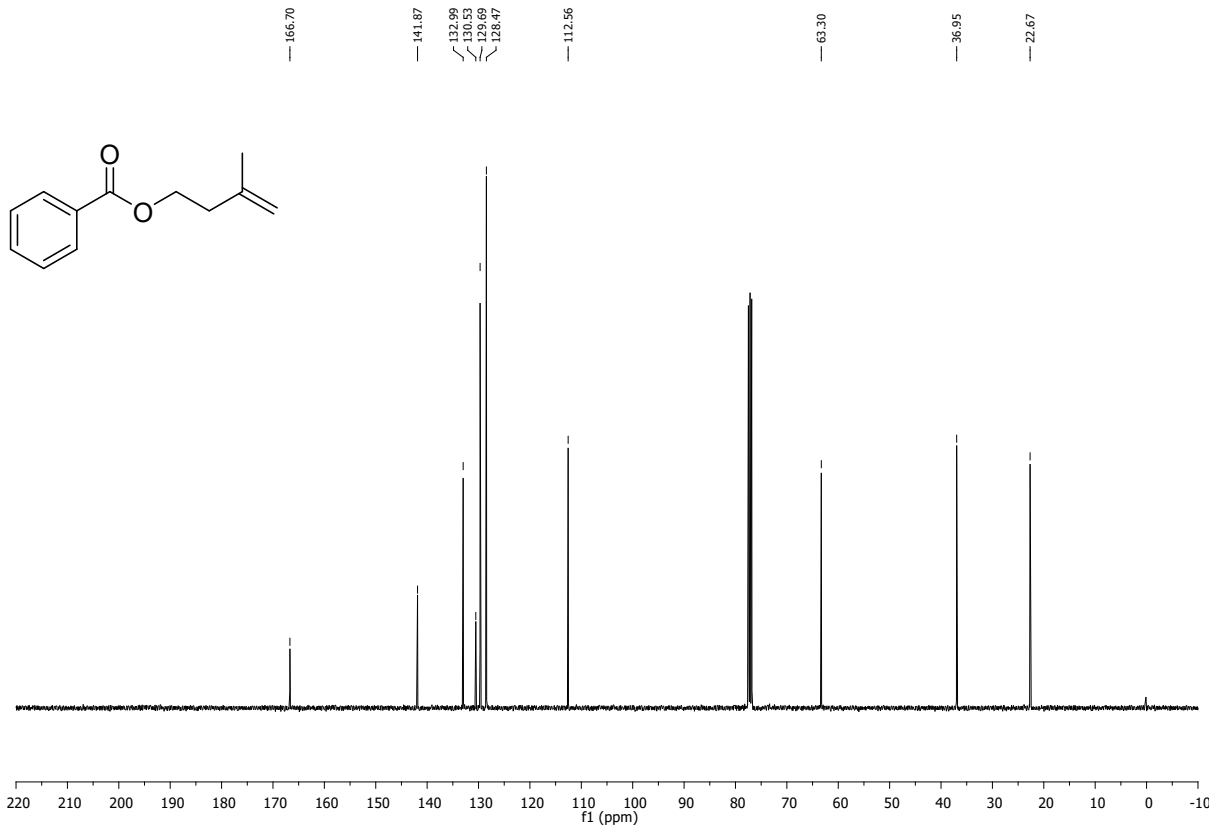

**1b**

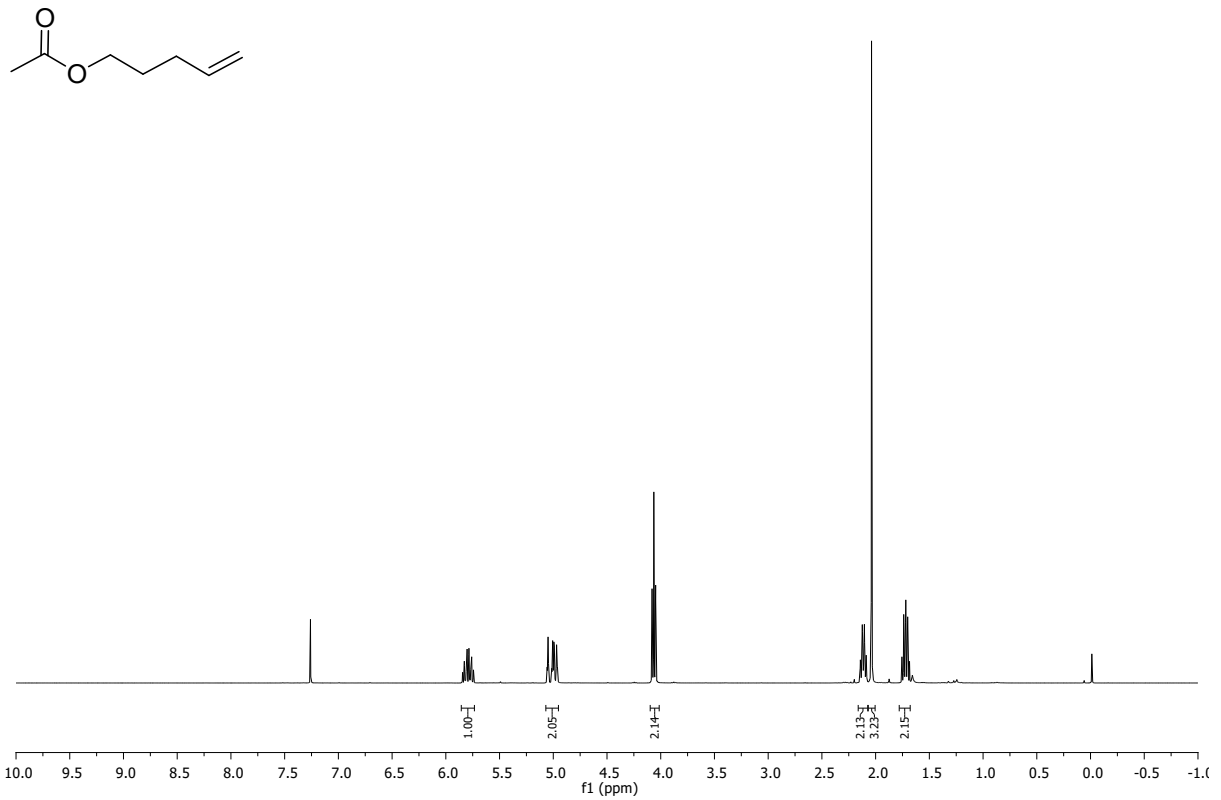

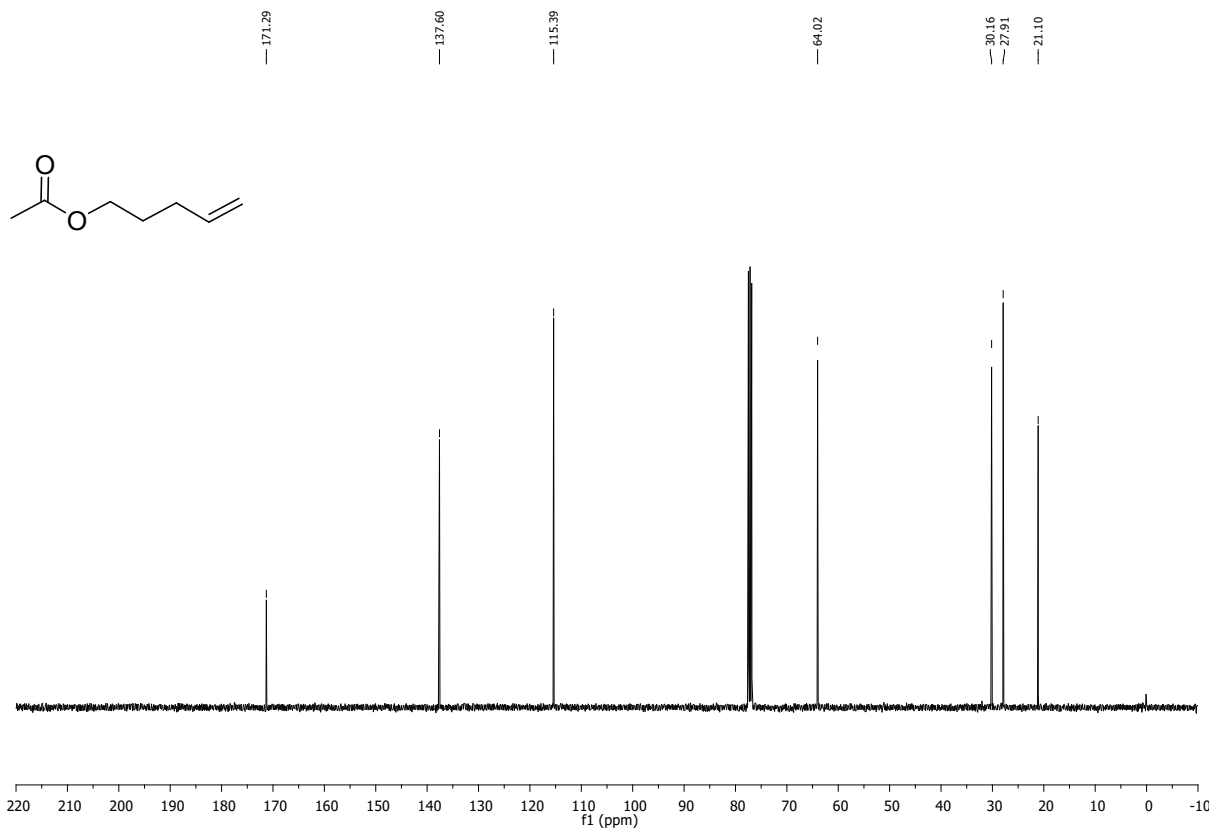

**1c**

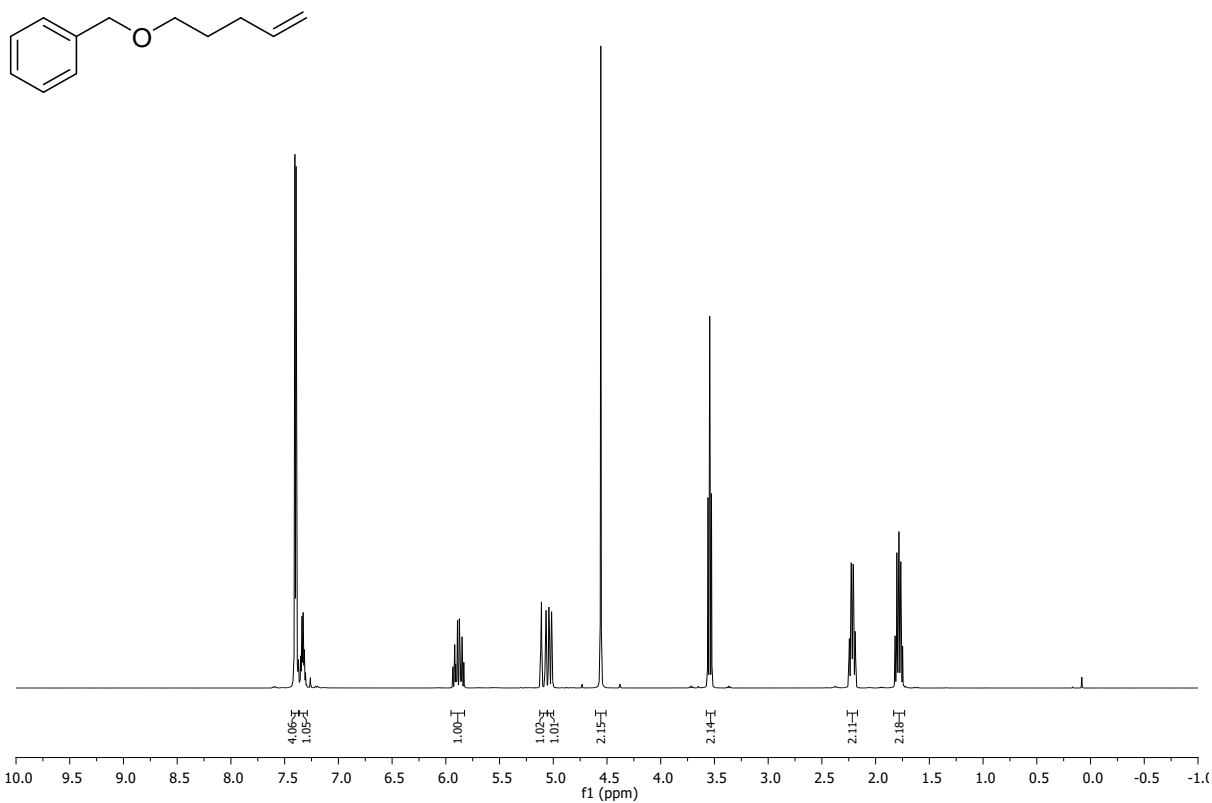

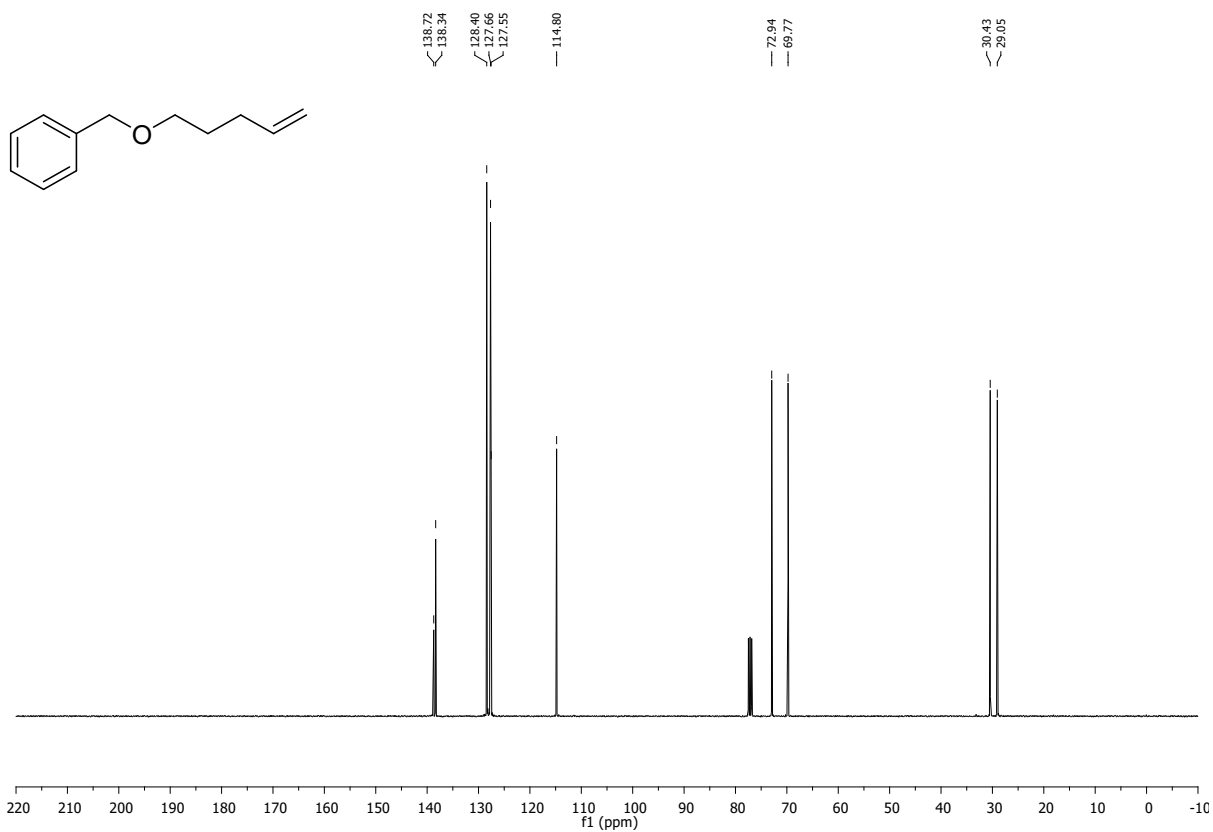

**1k**

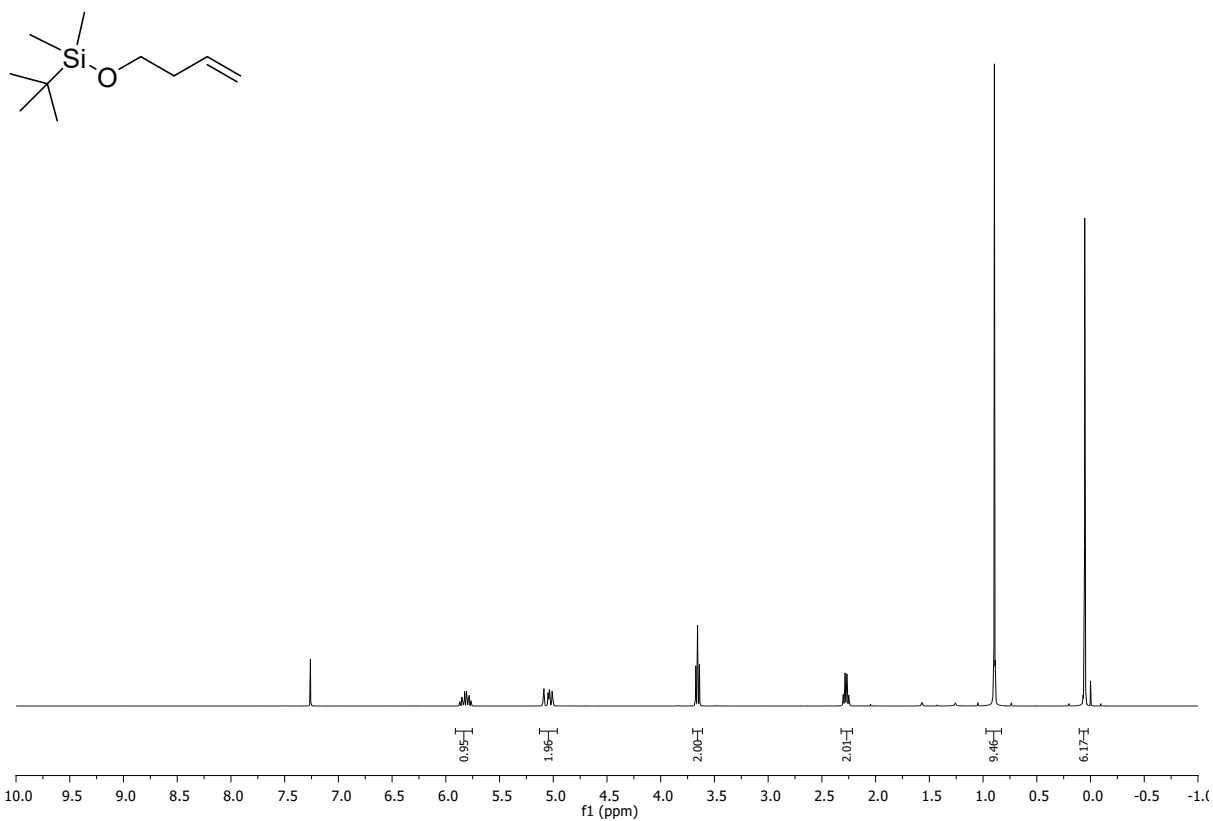

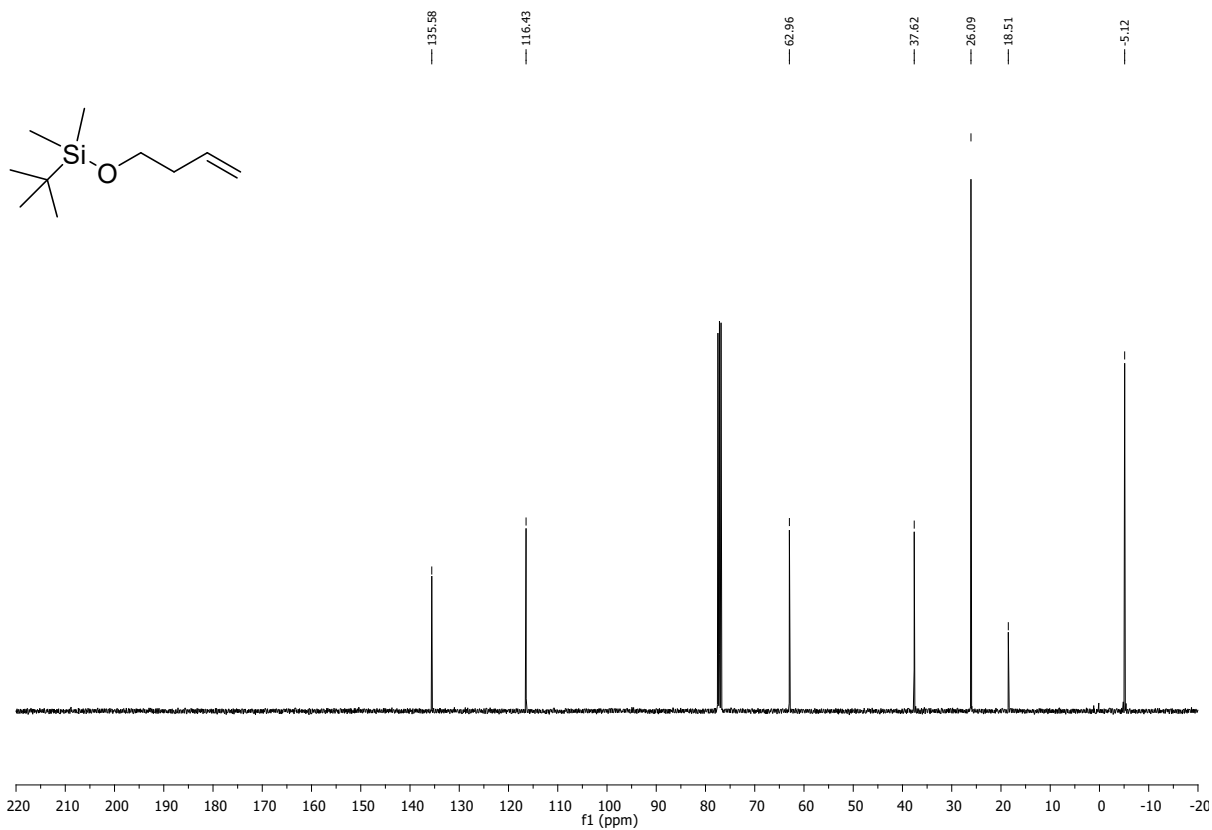

**1p**

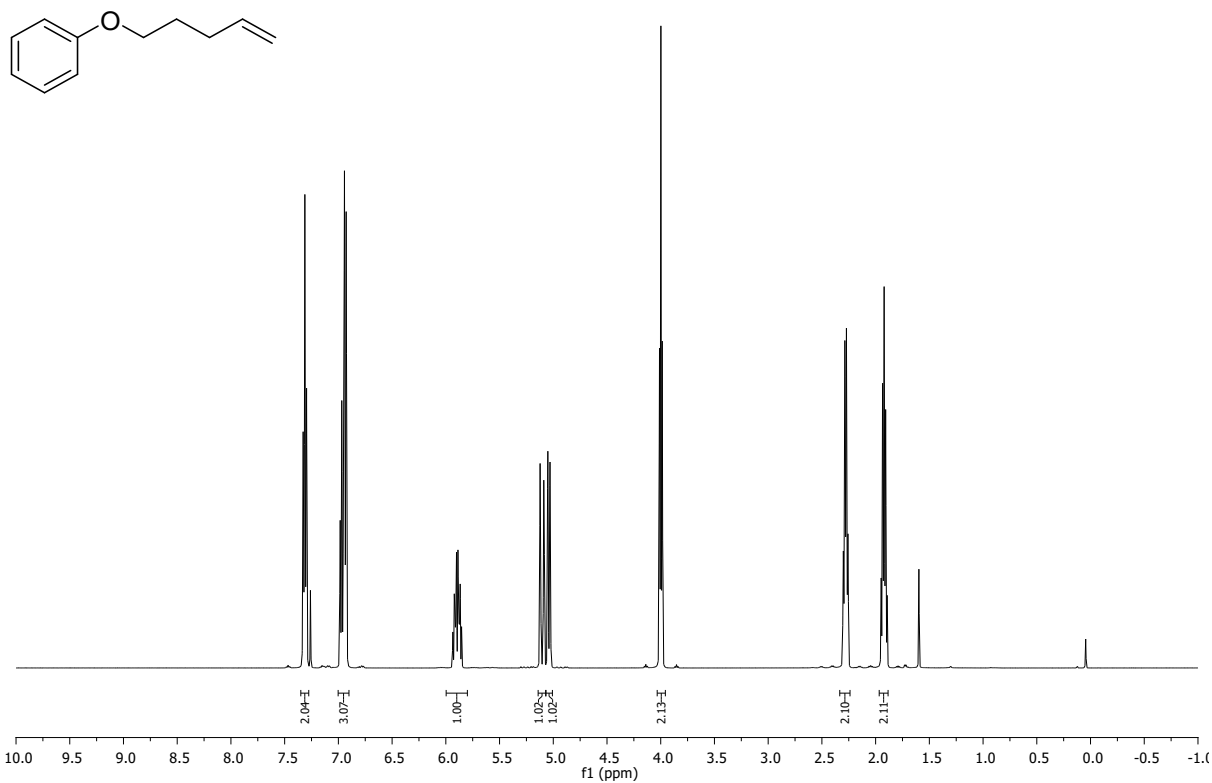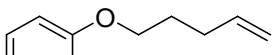



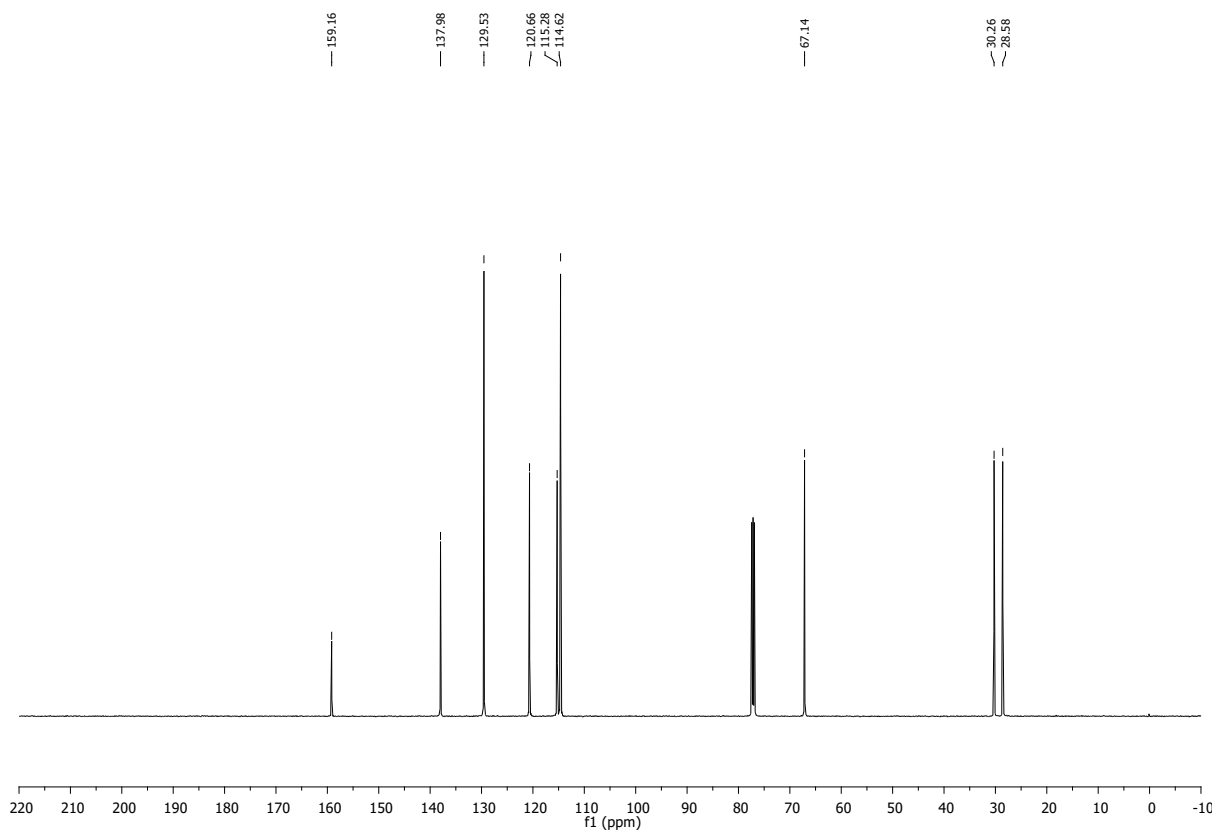

**1q**

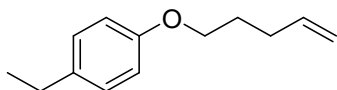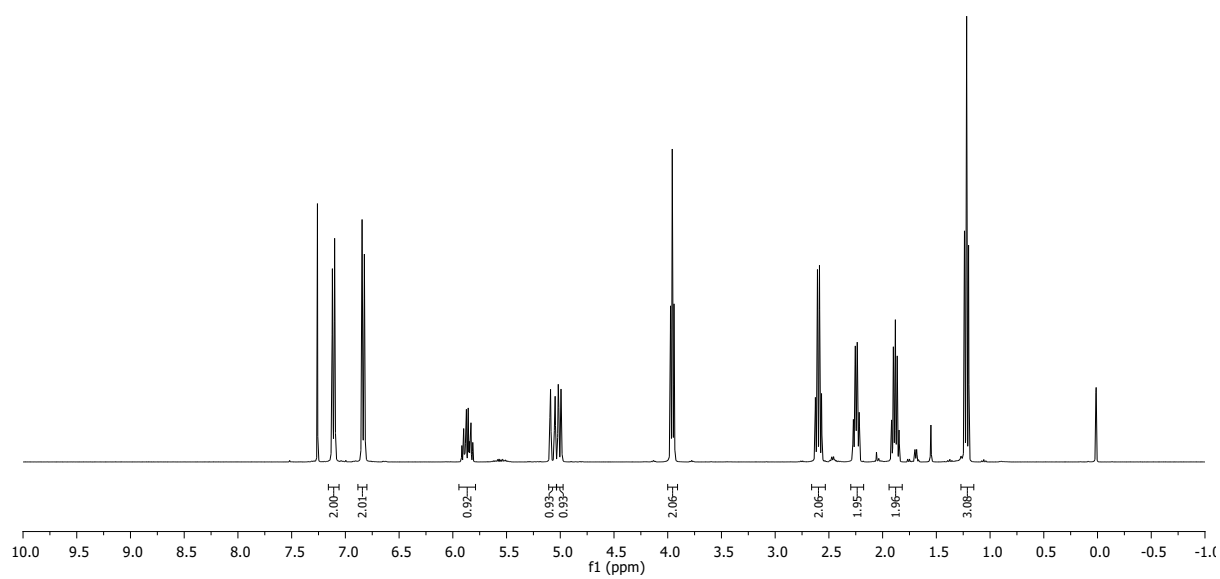

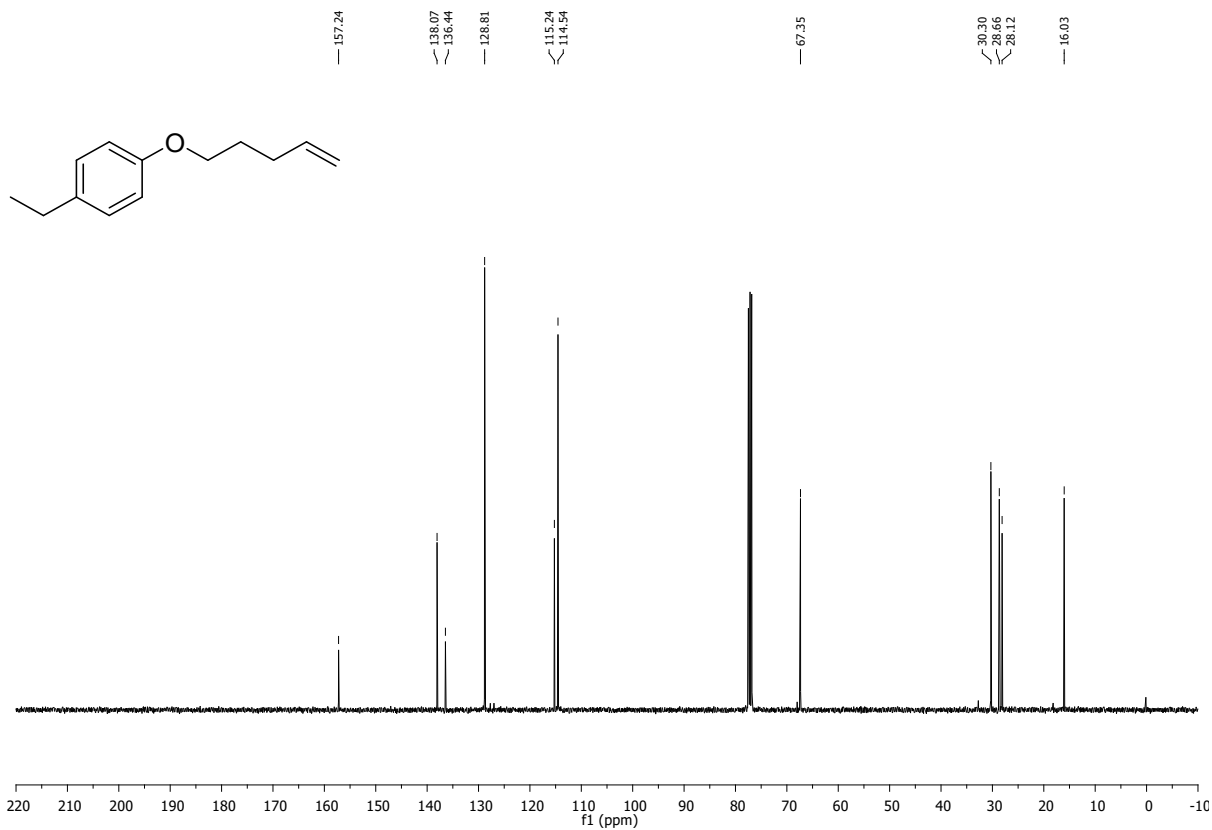

**1r**

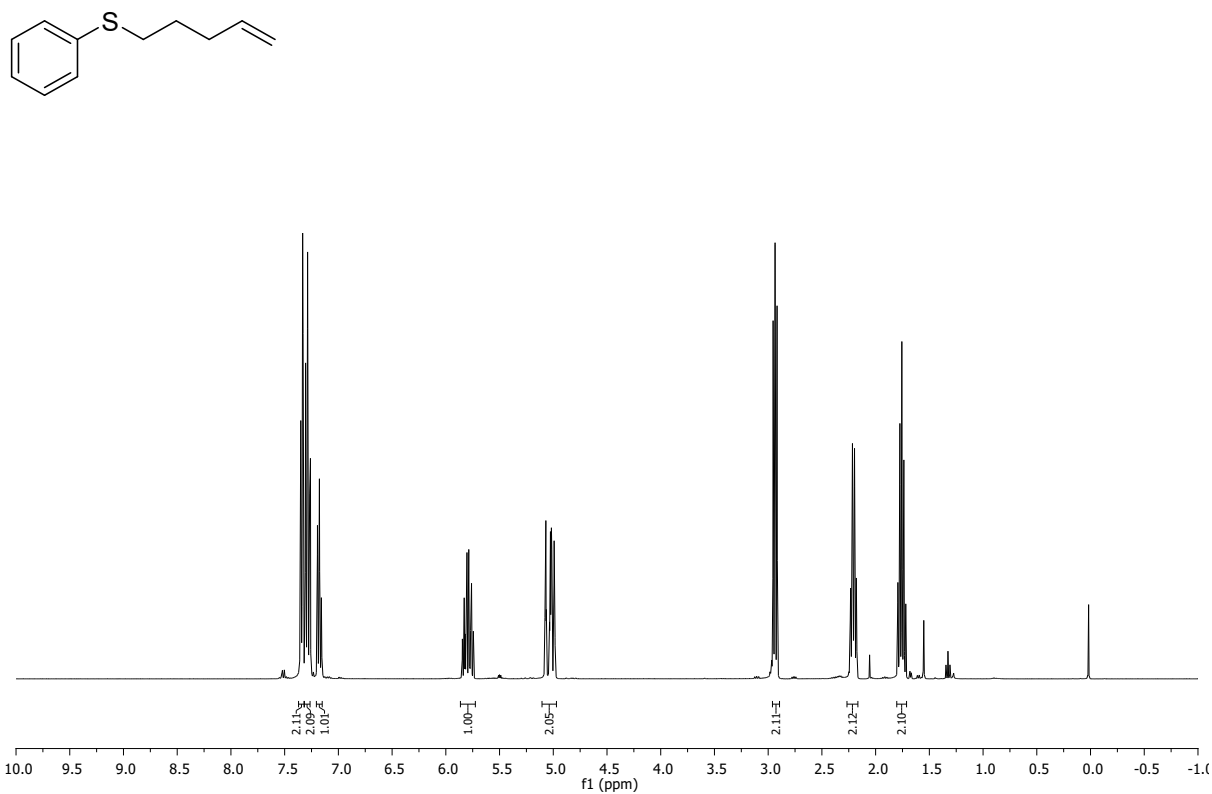

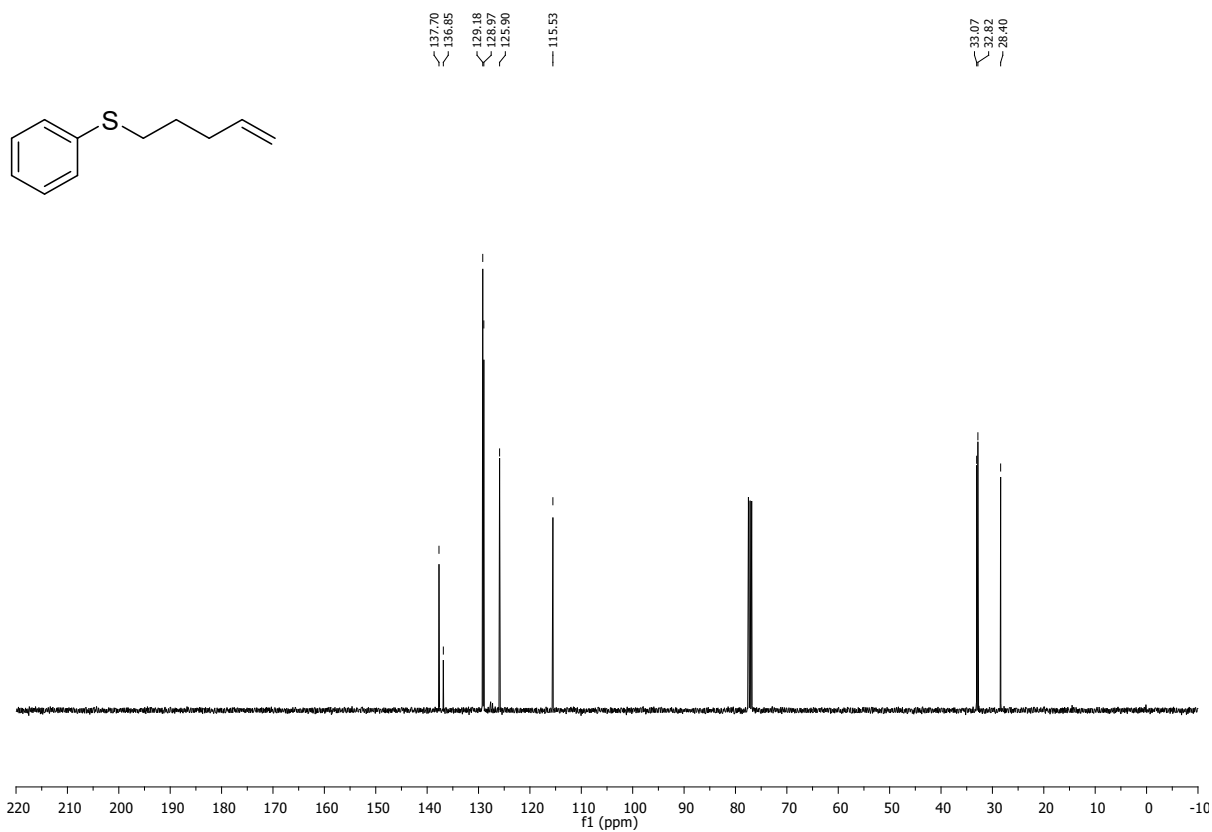

**1t**

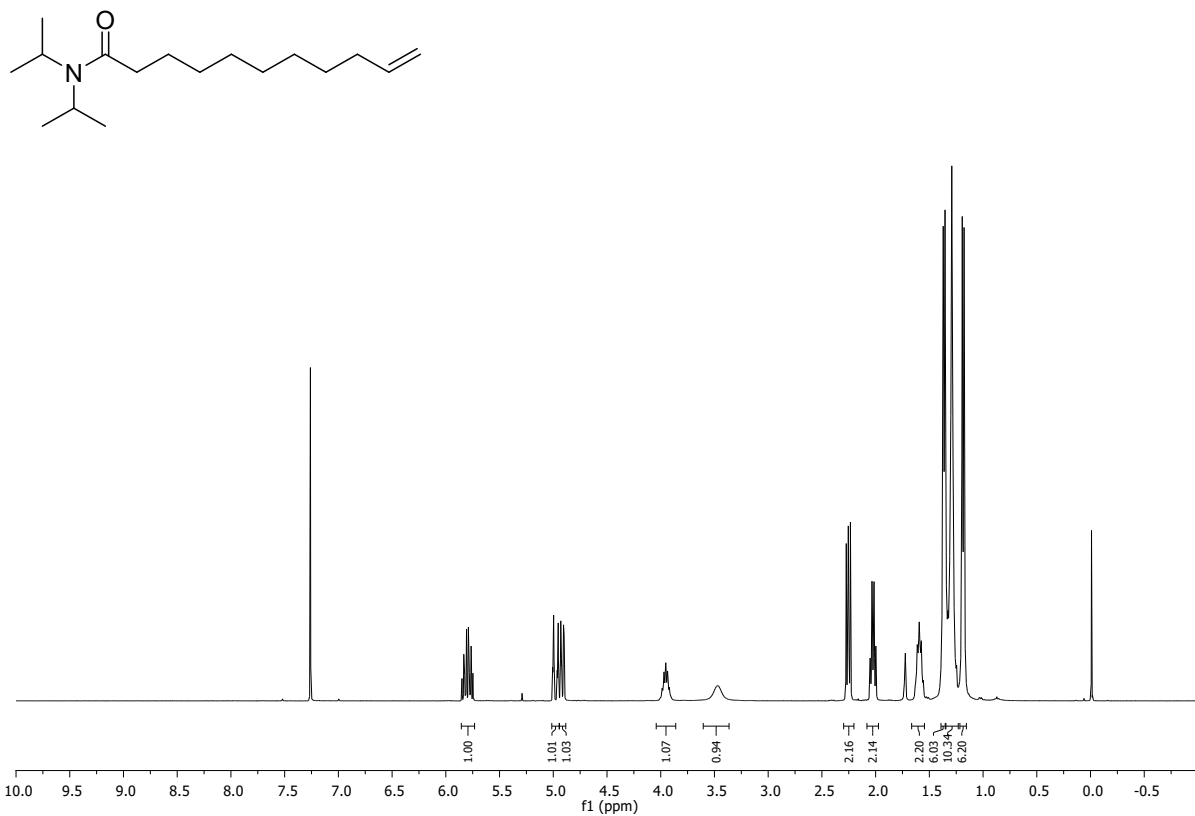

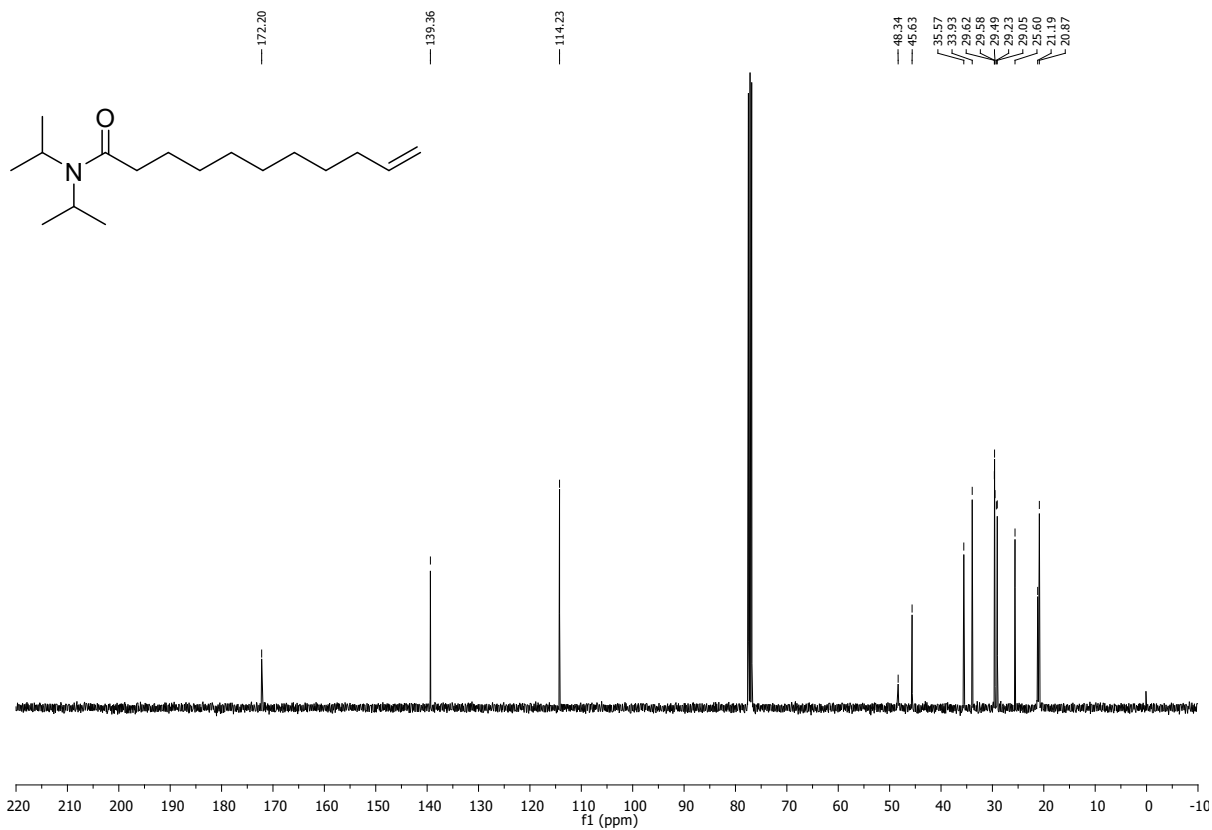

ii'

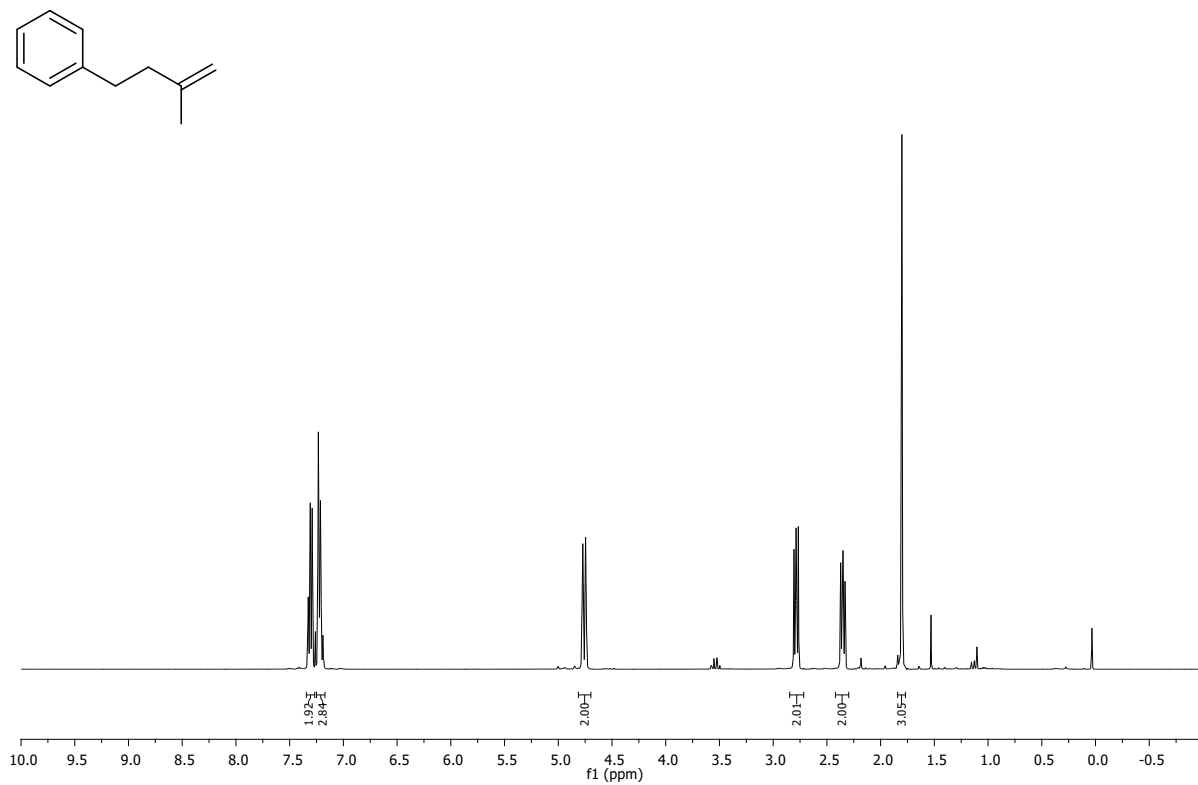

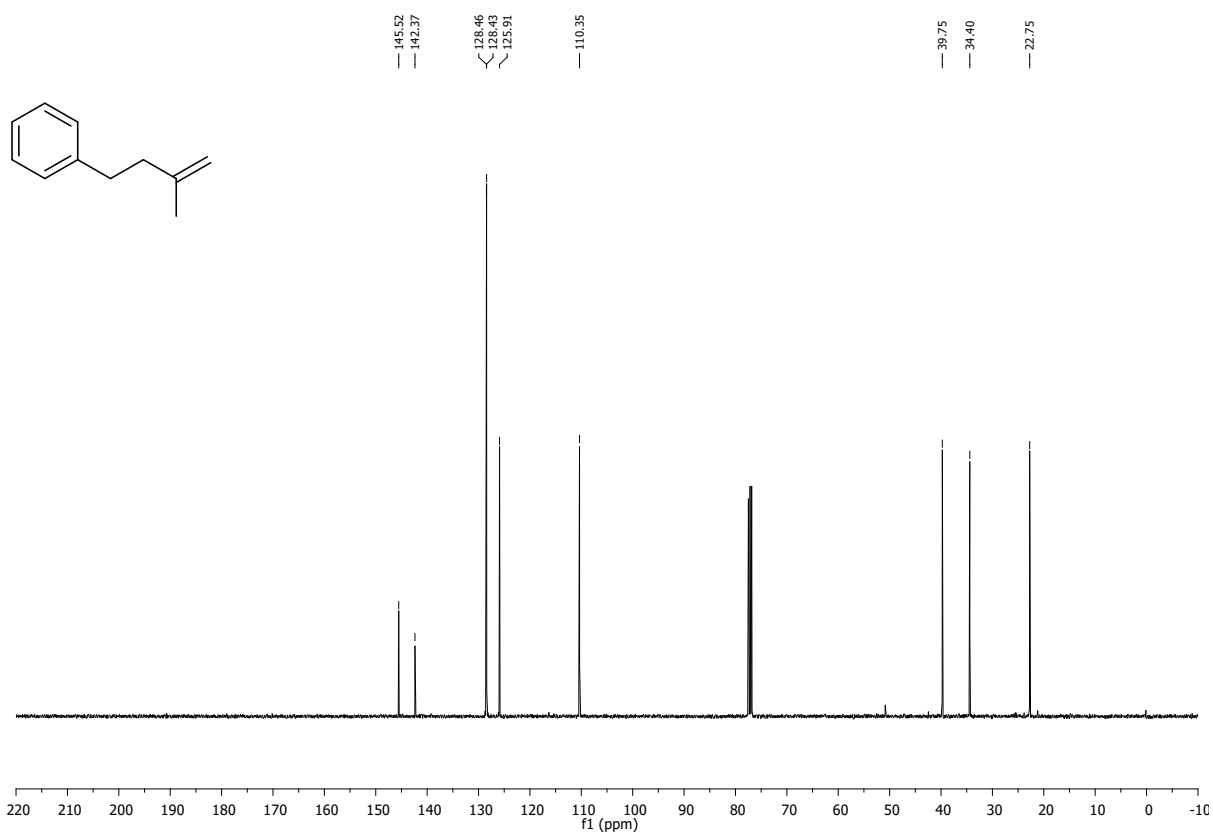

**Salen ligand**

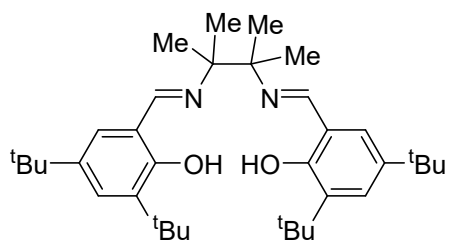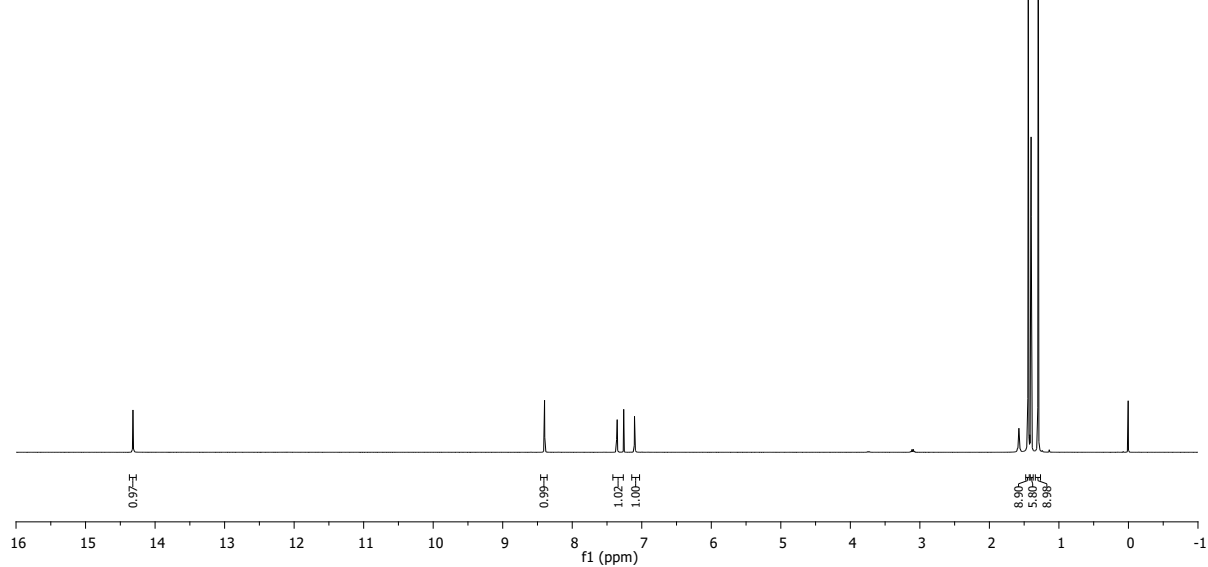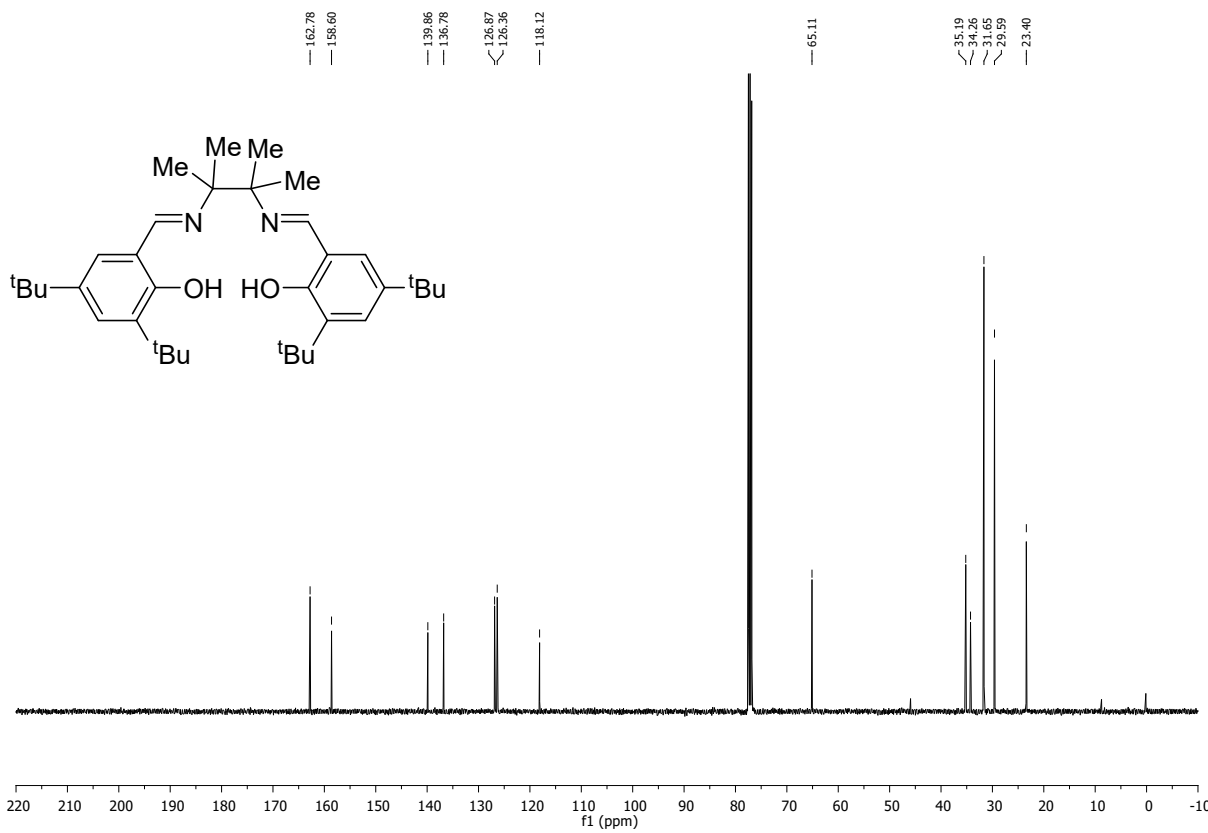

3aa

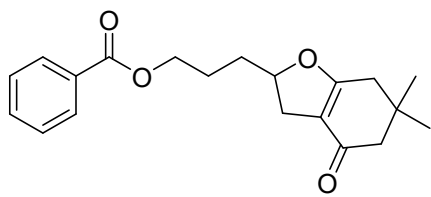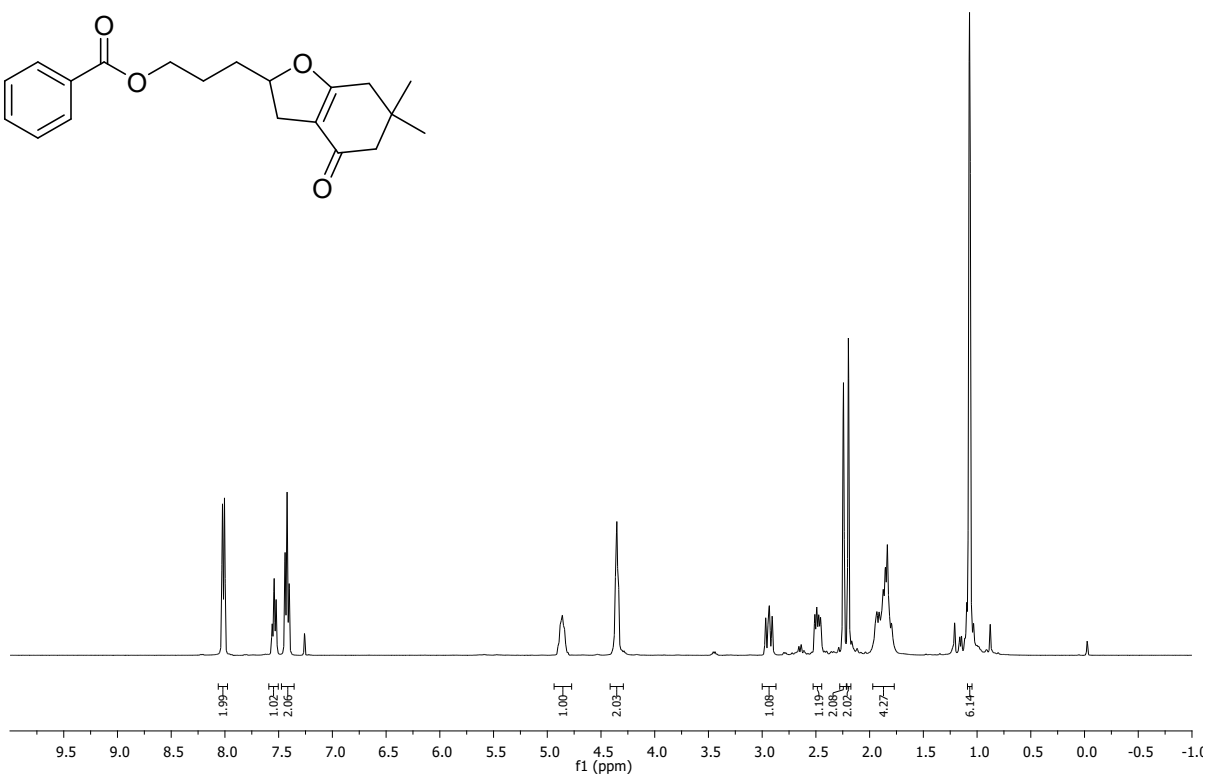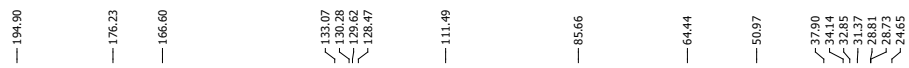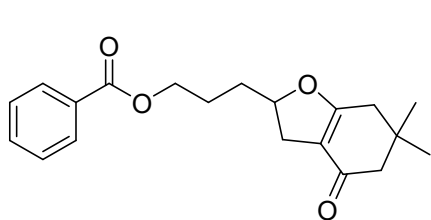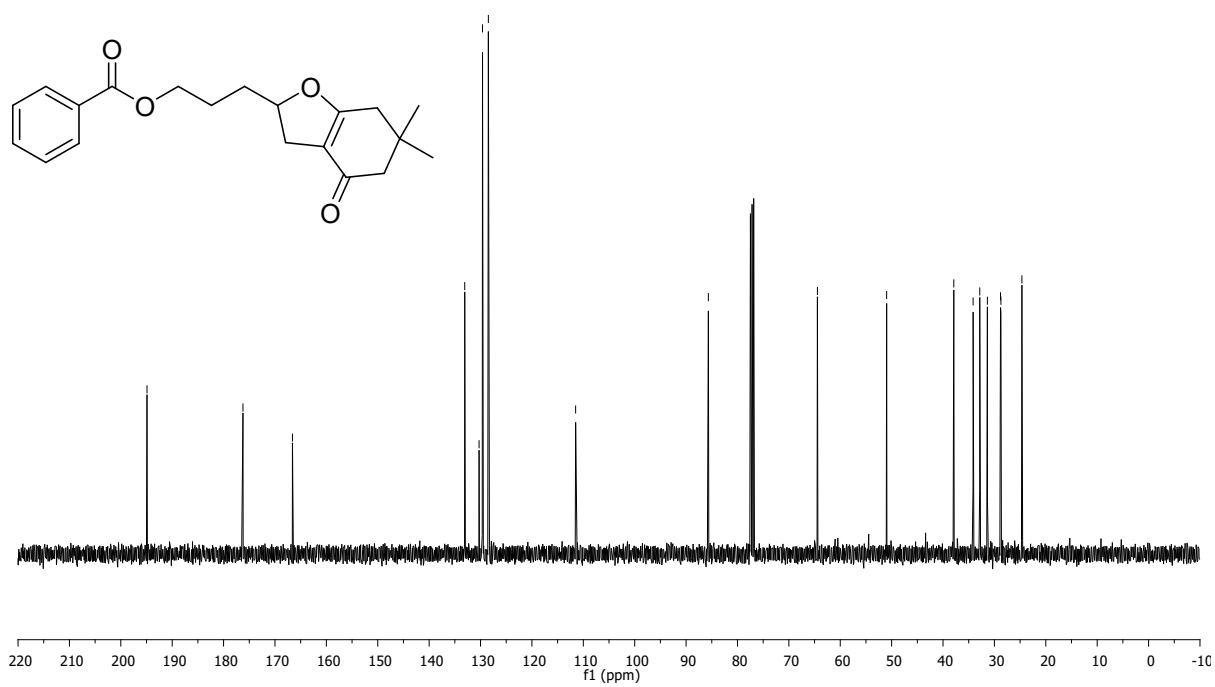

3ba

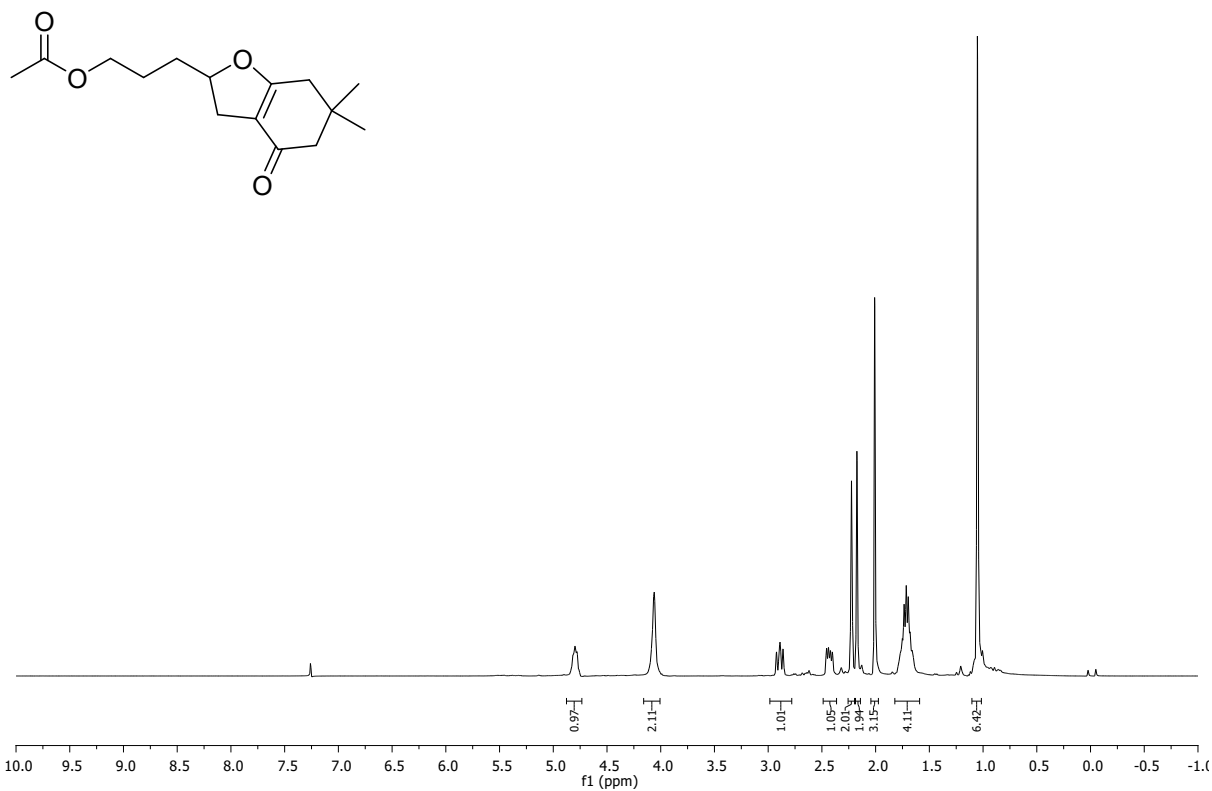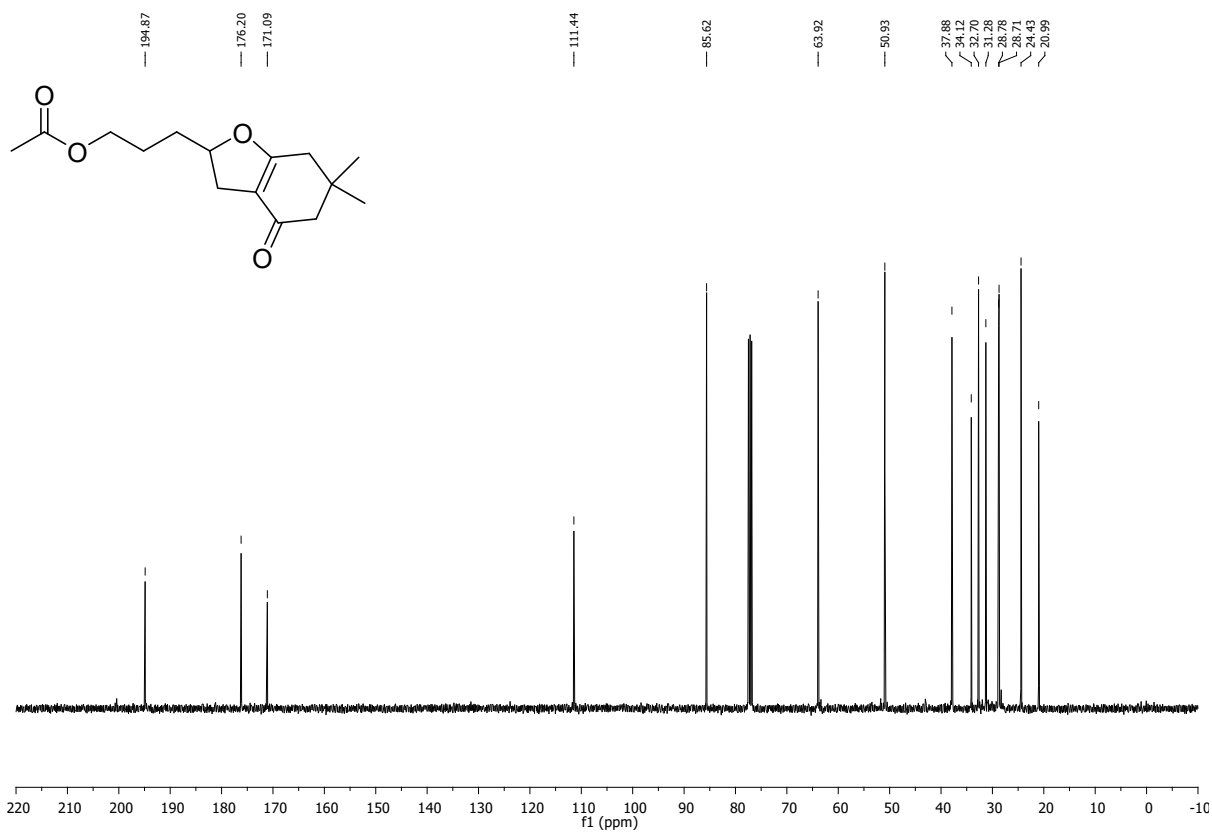

3ca



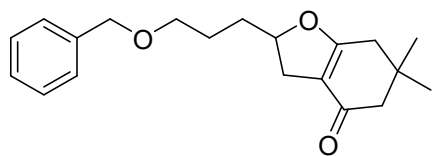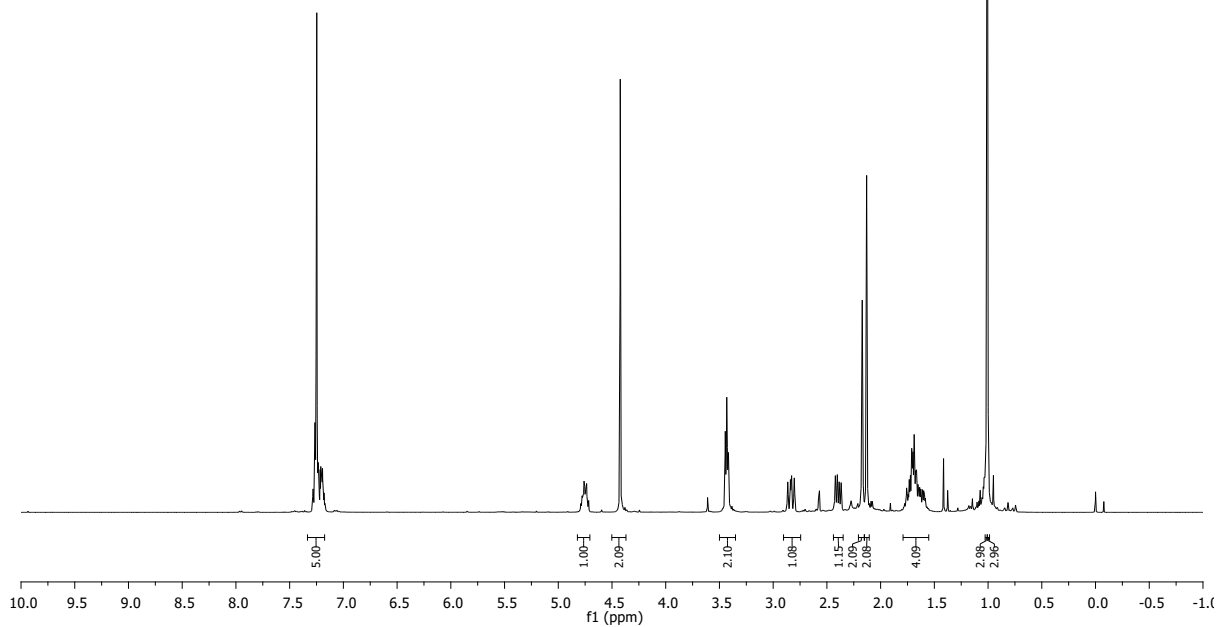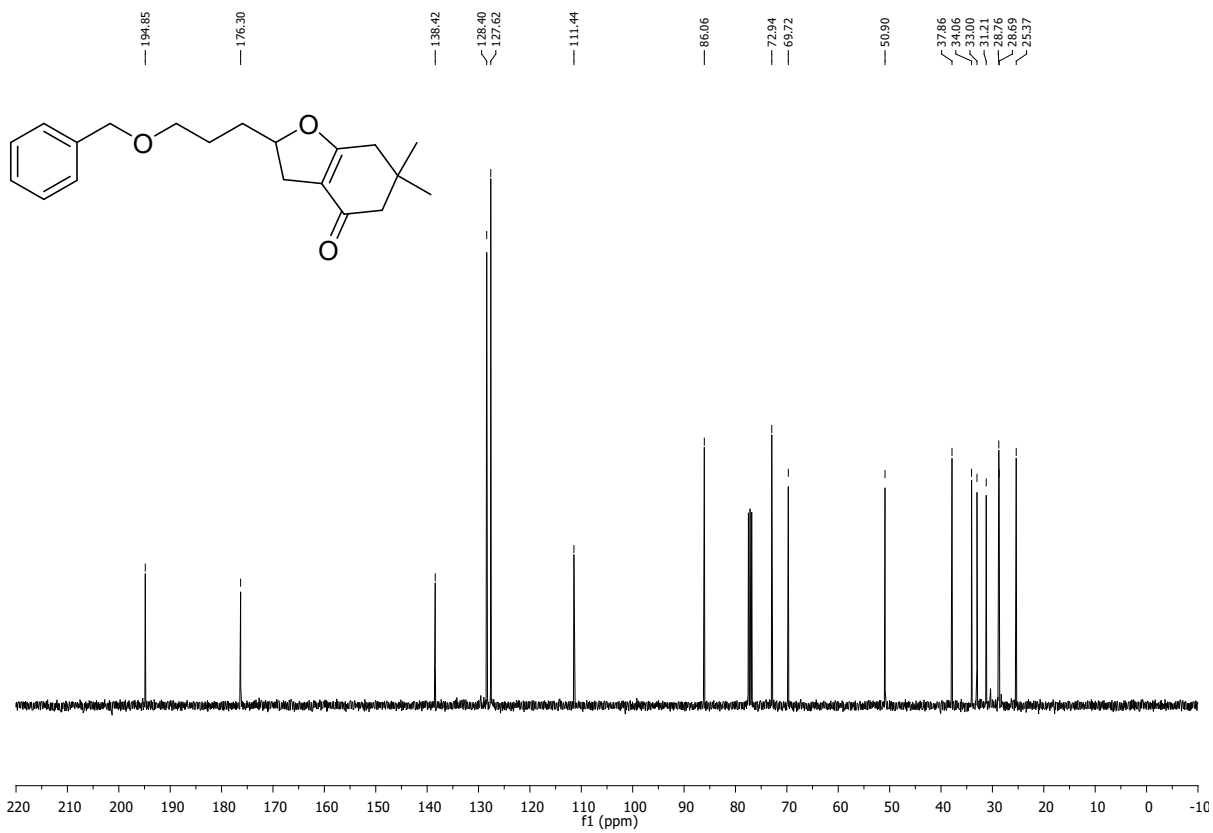

3da

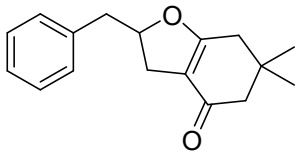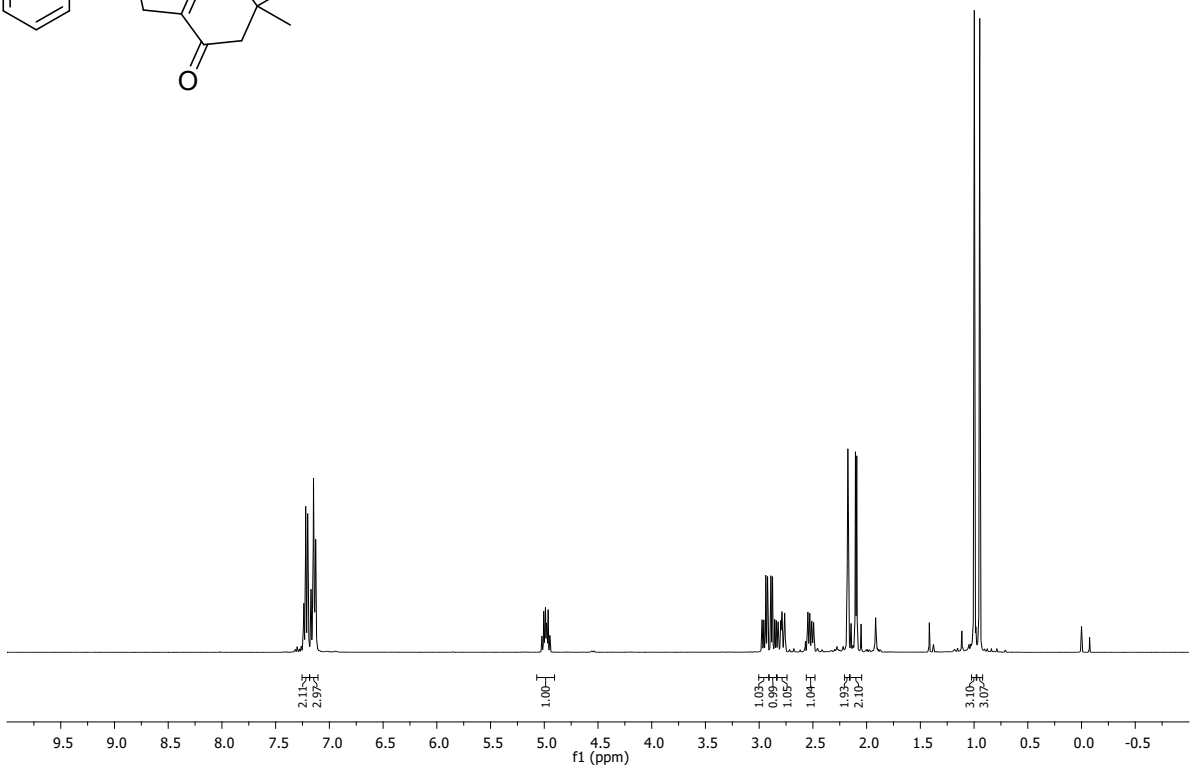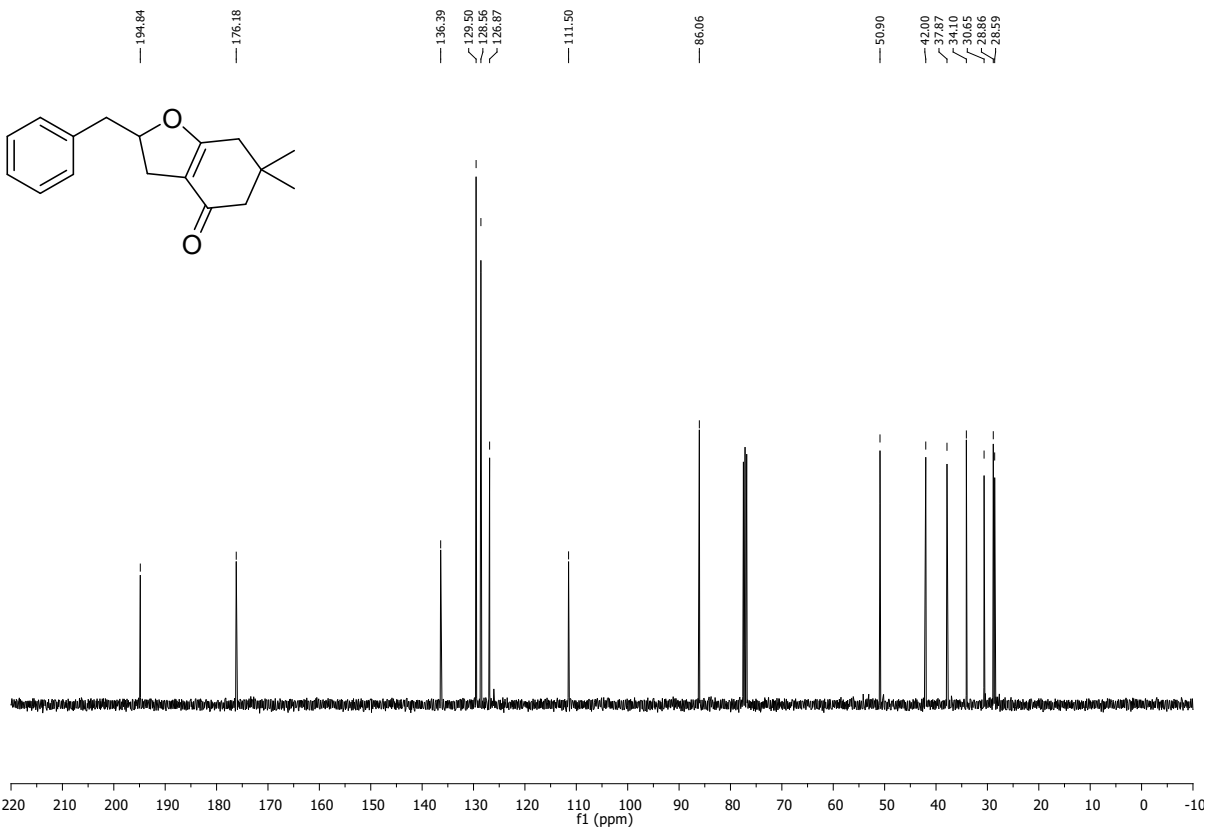

3ea

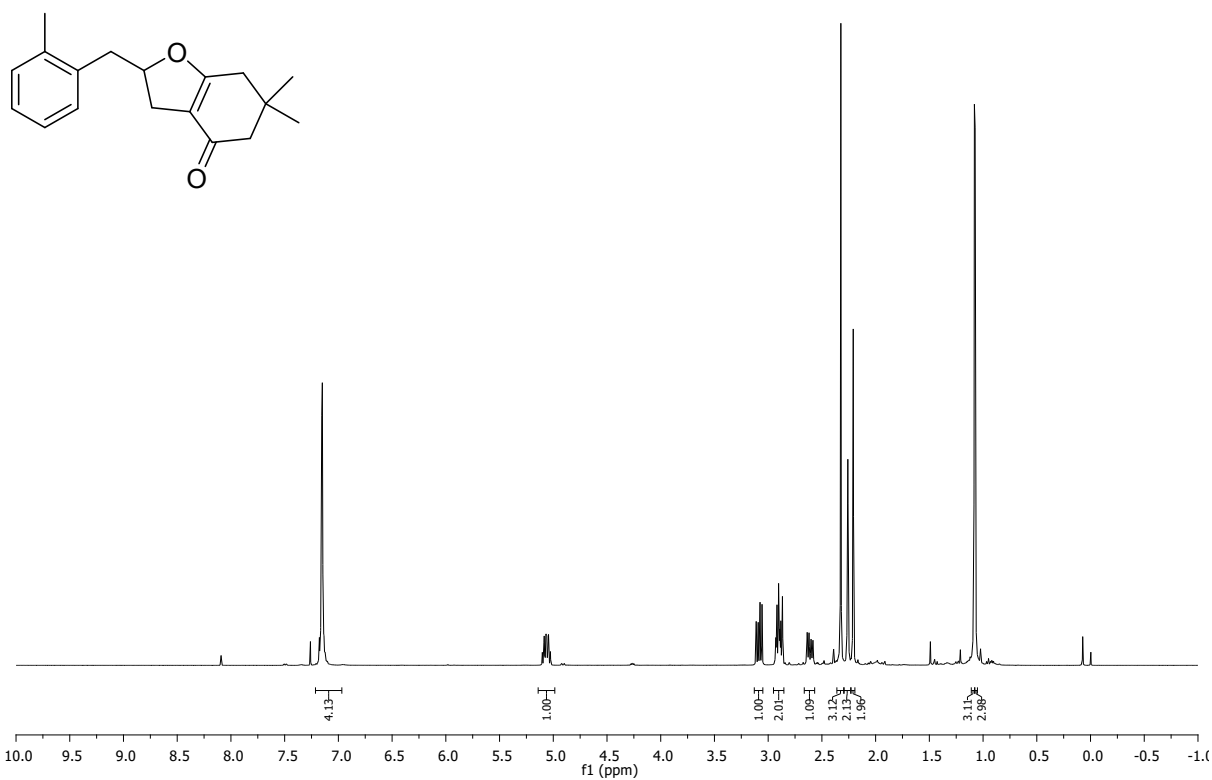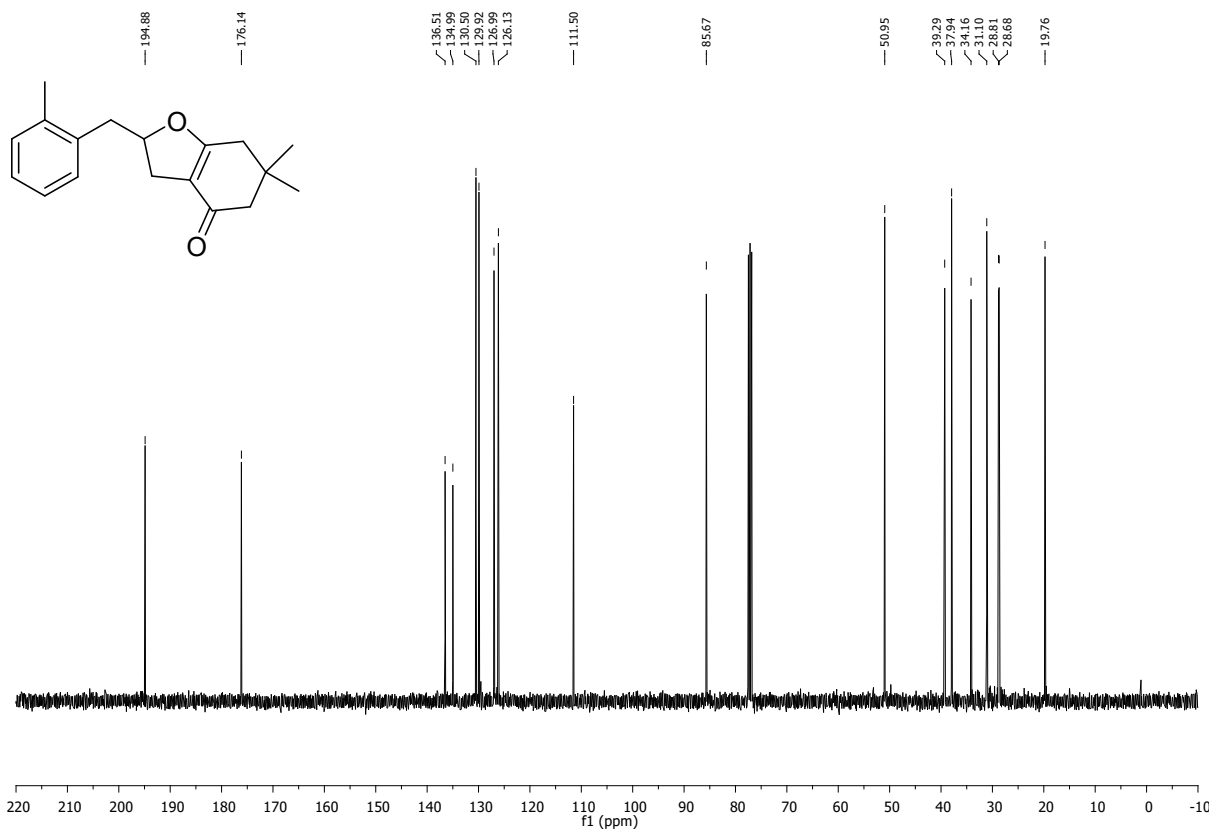

3fa

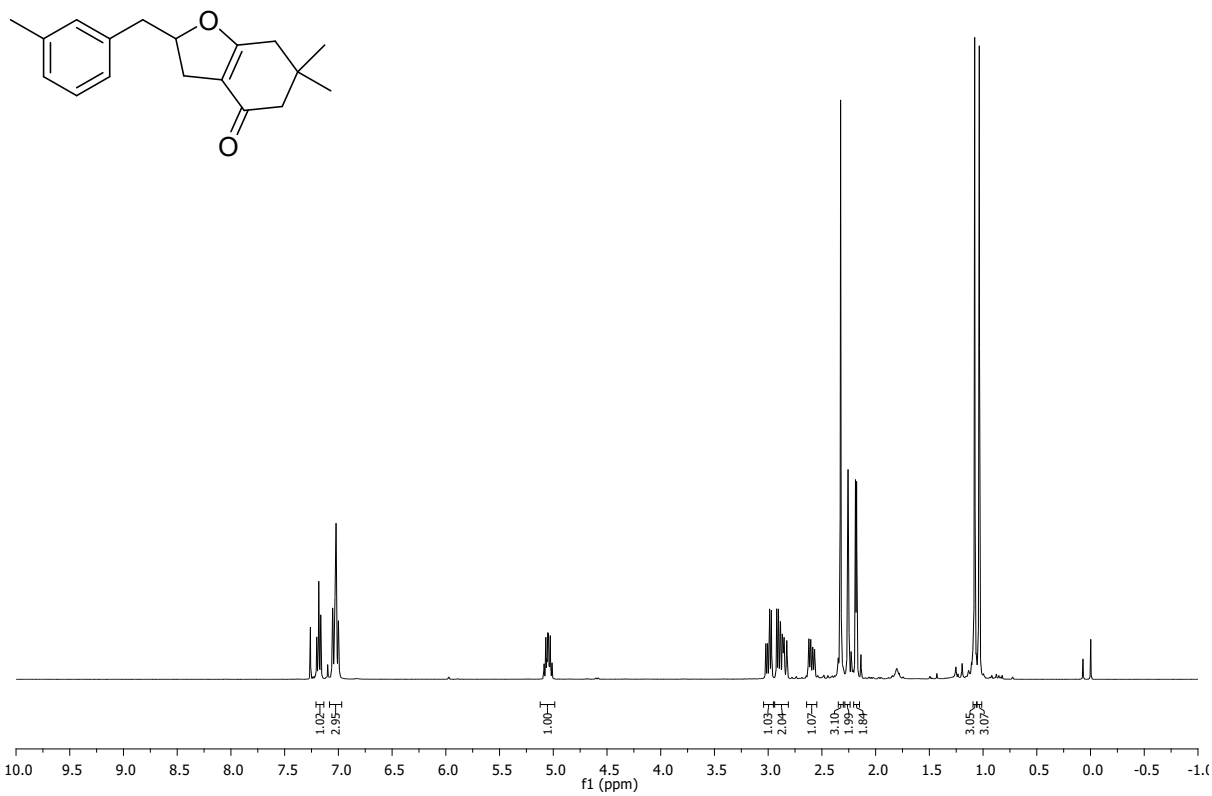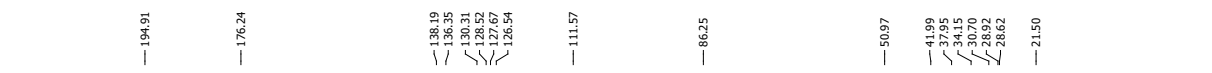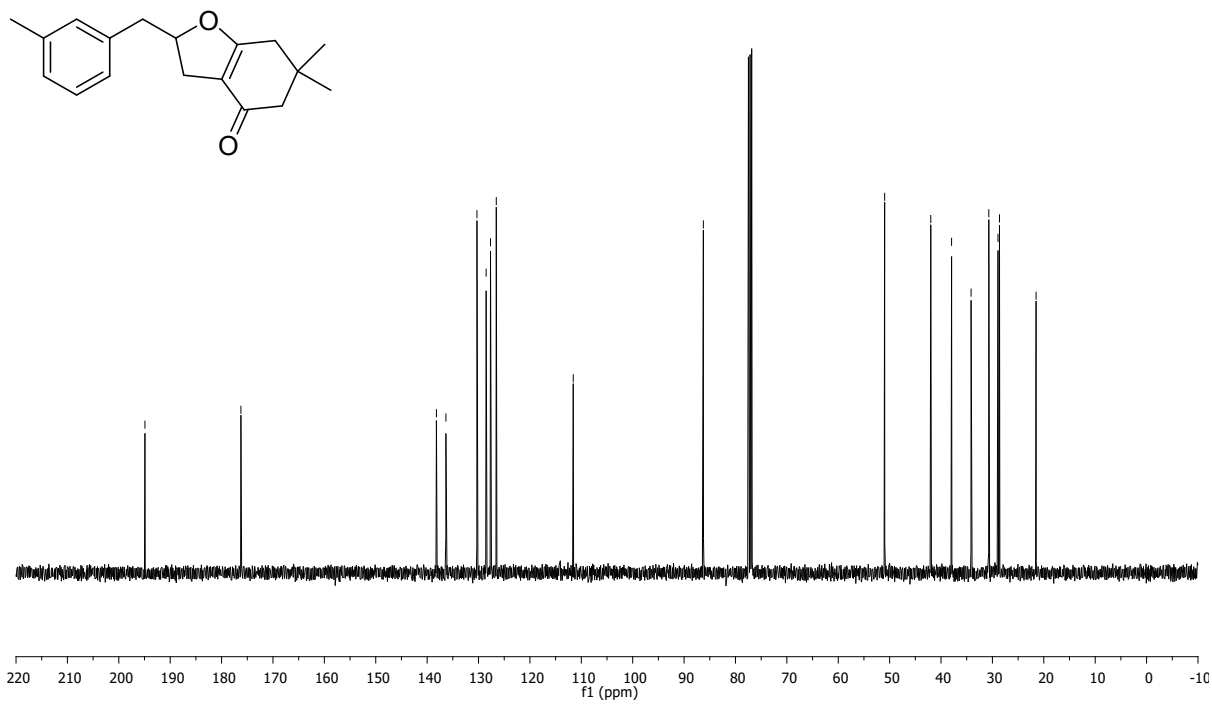

3ga

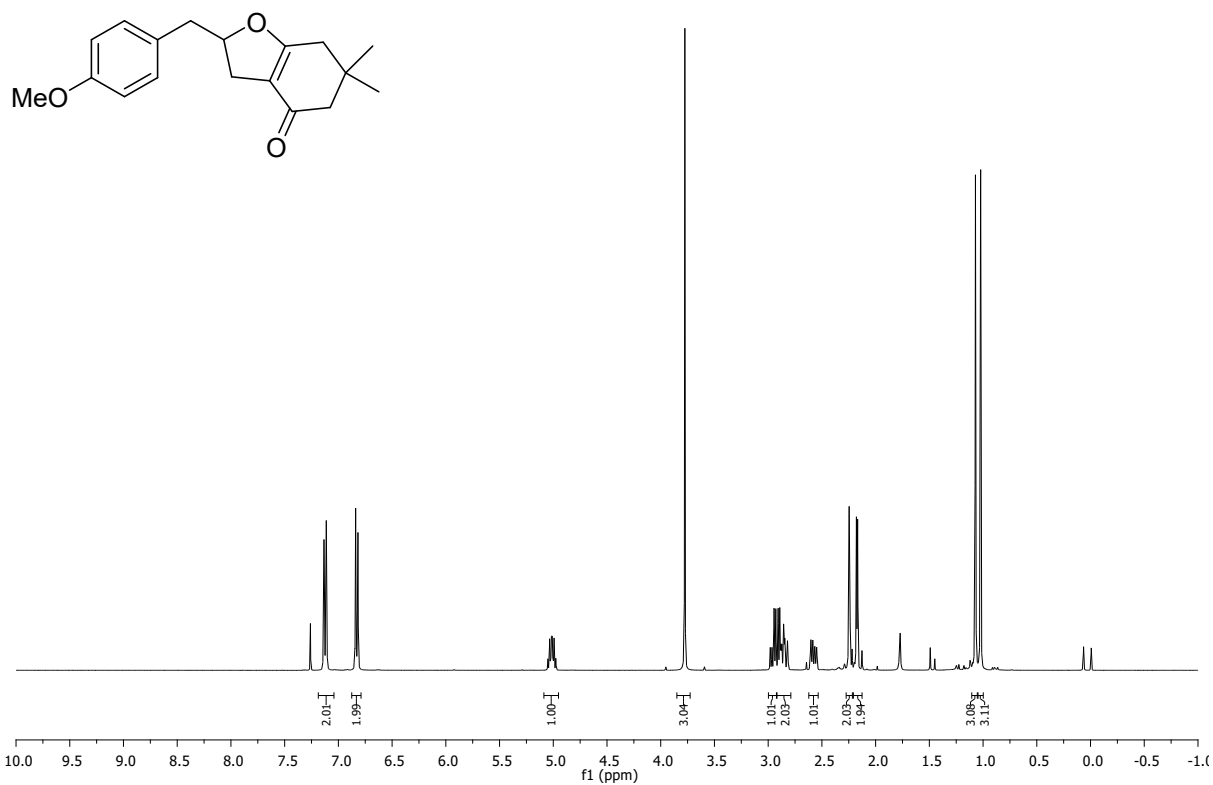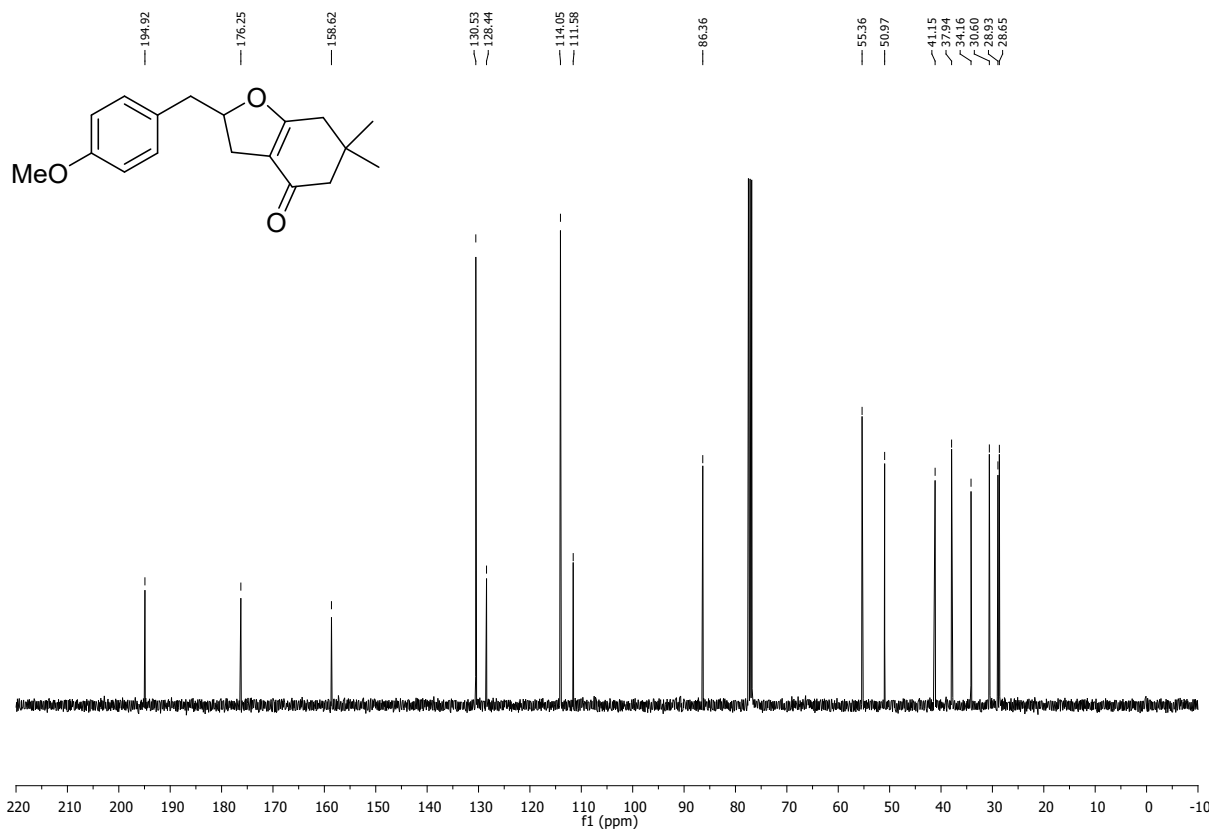

3ha

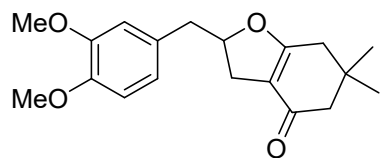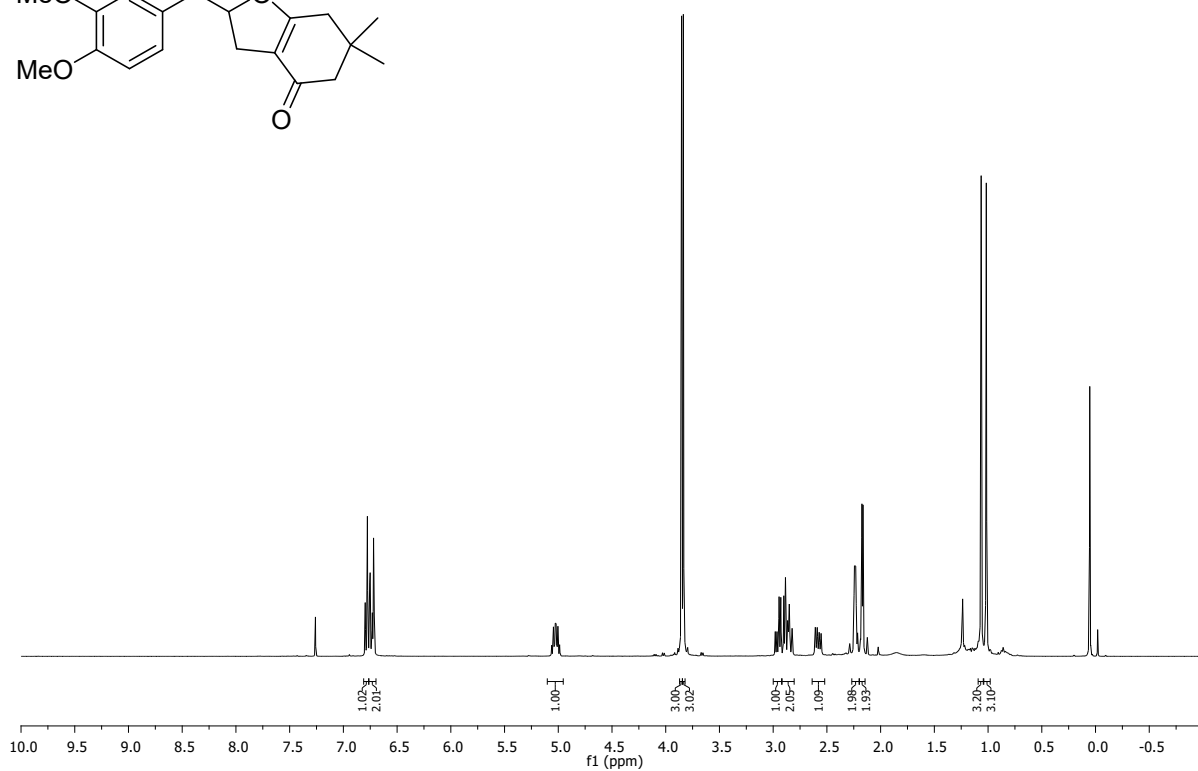

— 194.88  
 — 176.16  
 < 148.97  
 < 148.05  
 — 128.93  
 — 121.61  
 < 112.72  
 < 111.58  
 < 111.38  
 — 86.29  
 < 55.99  
 < 55.96  
 < 50.94  
 < 41.59  
 < 37.95  
 < 34.14  
 < 33.64  
 < 28.88  
 < 28.61

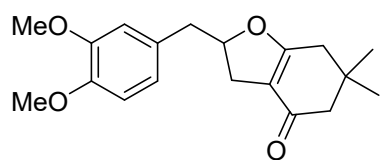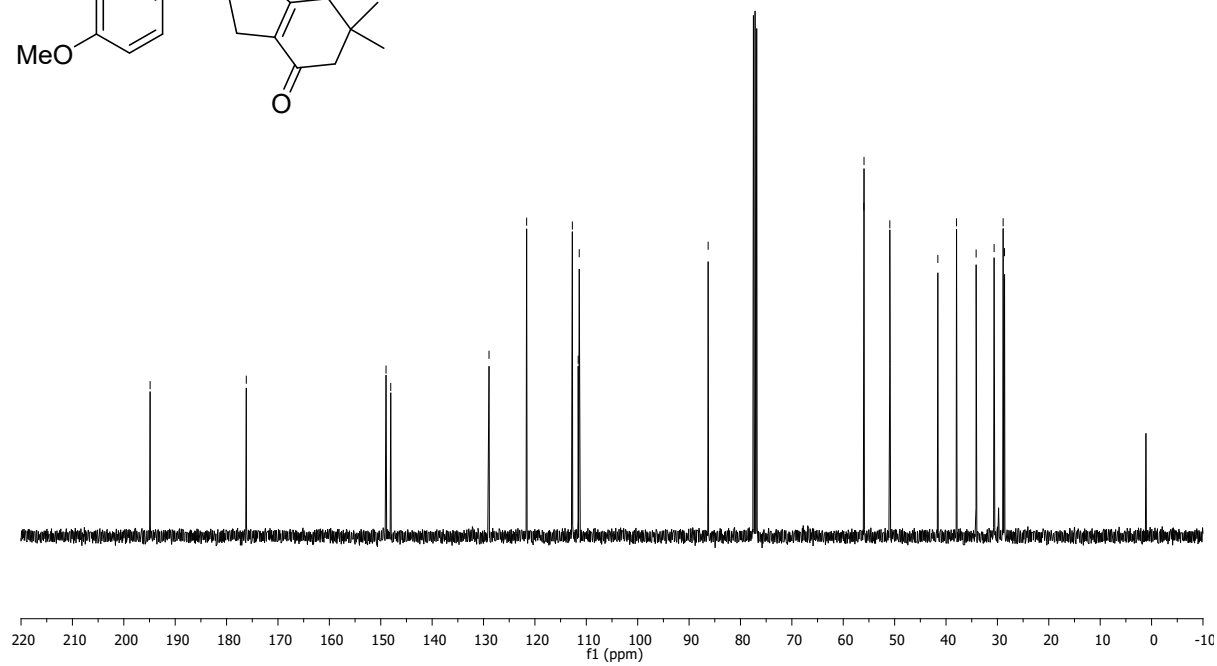

3ia

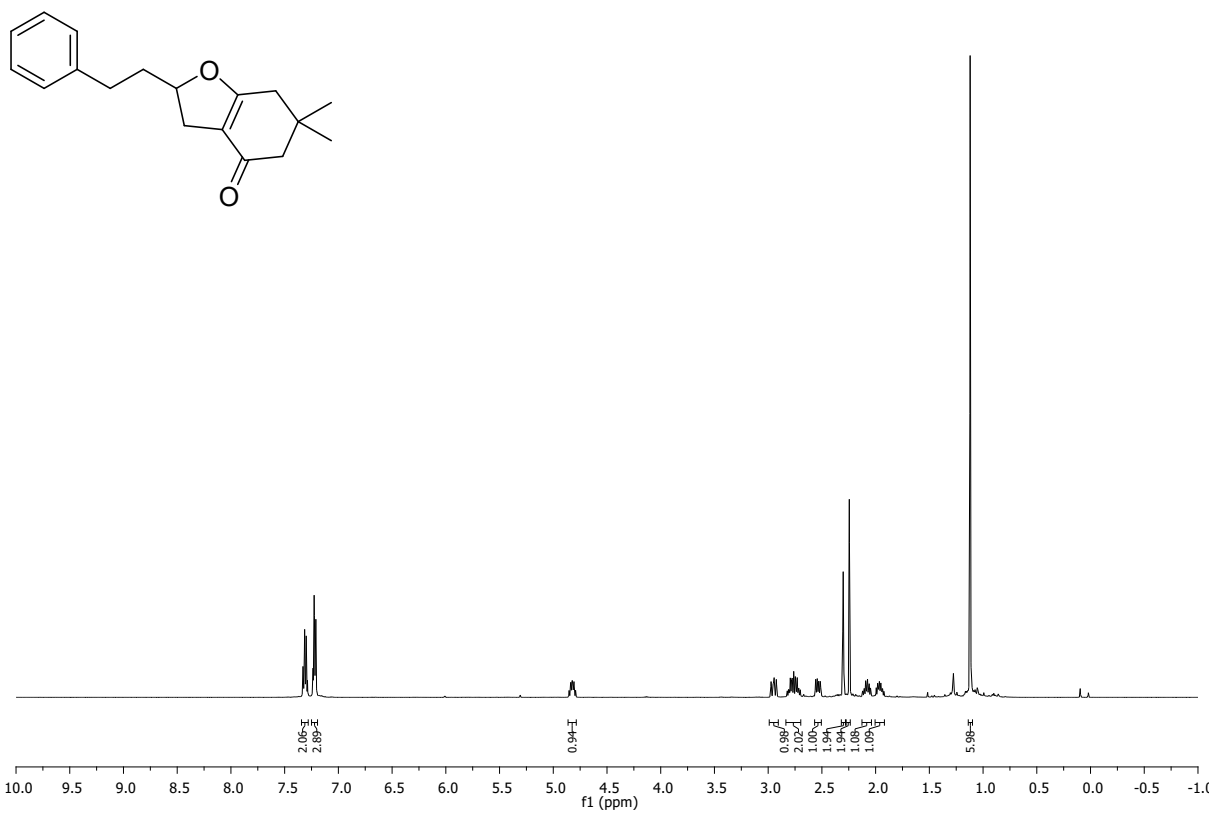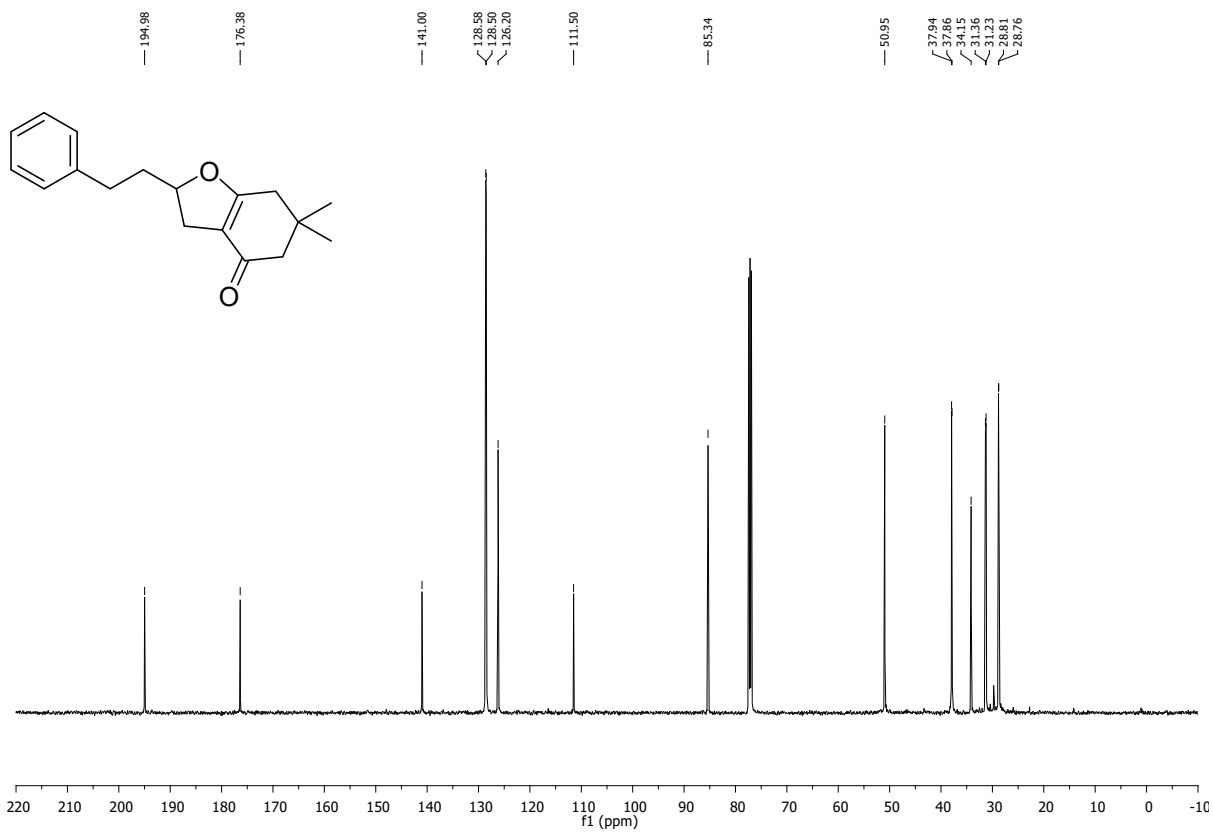

3ja

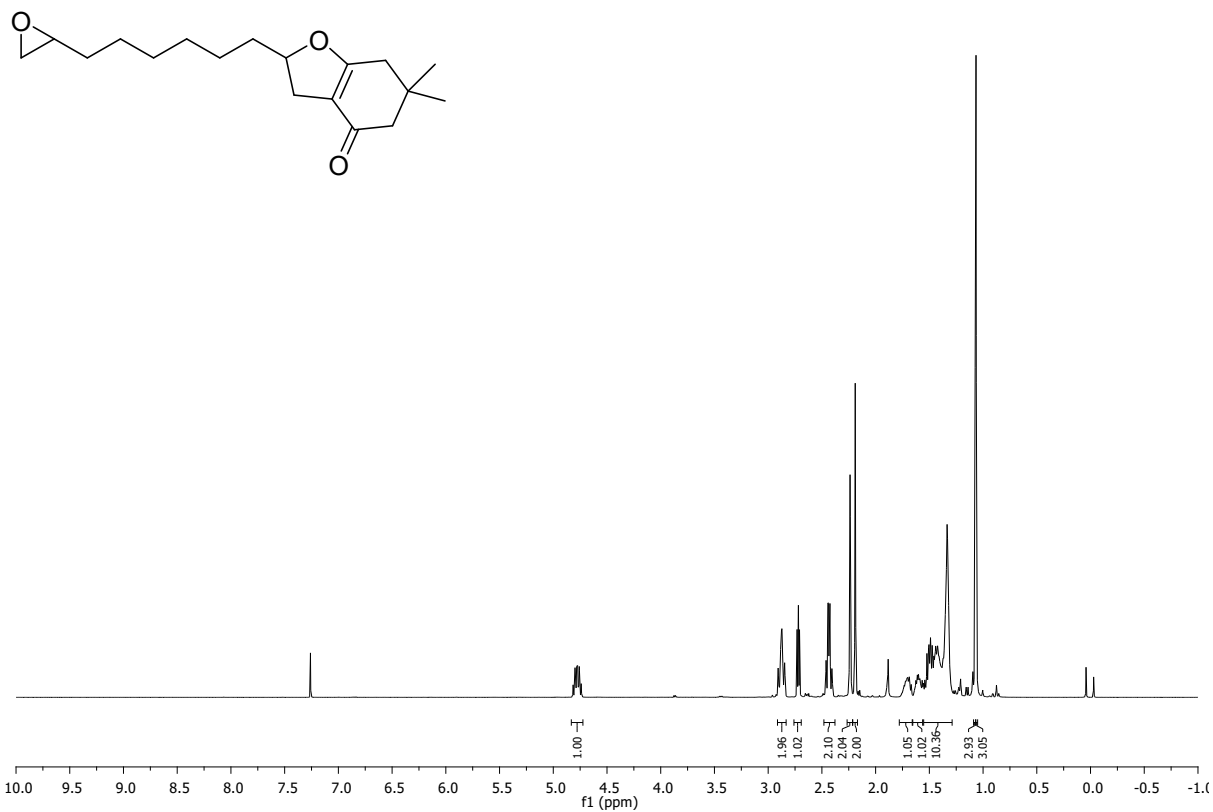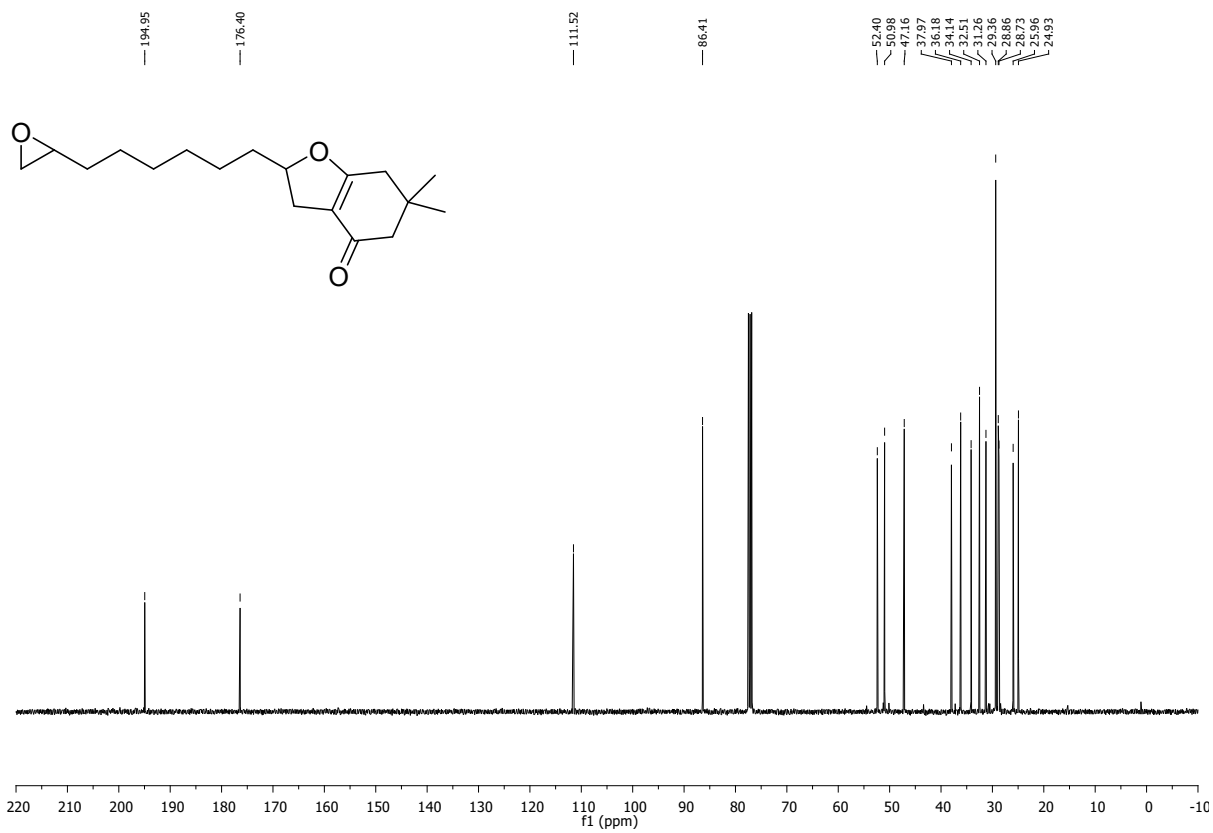

3ka



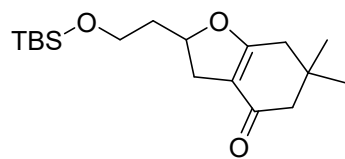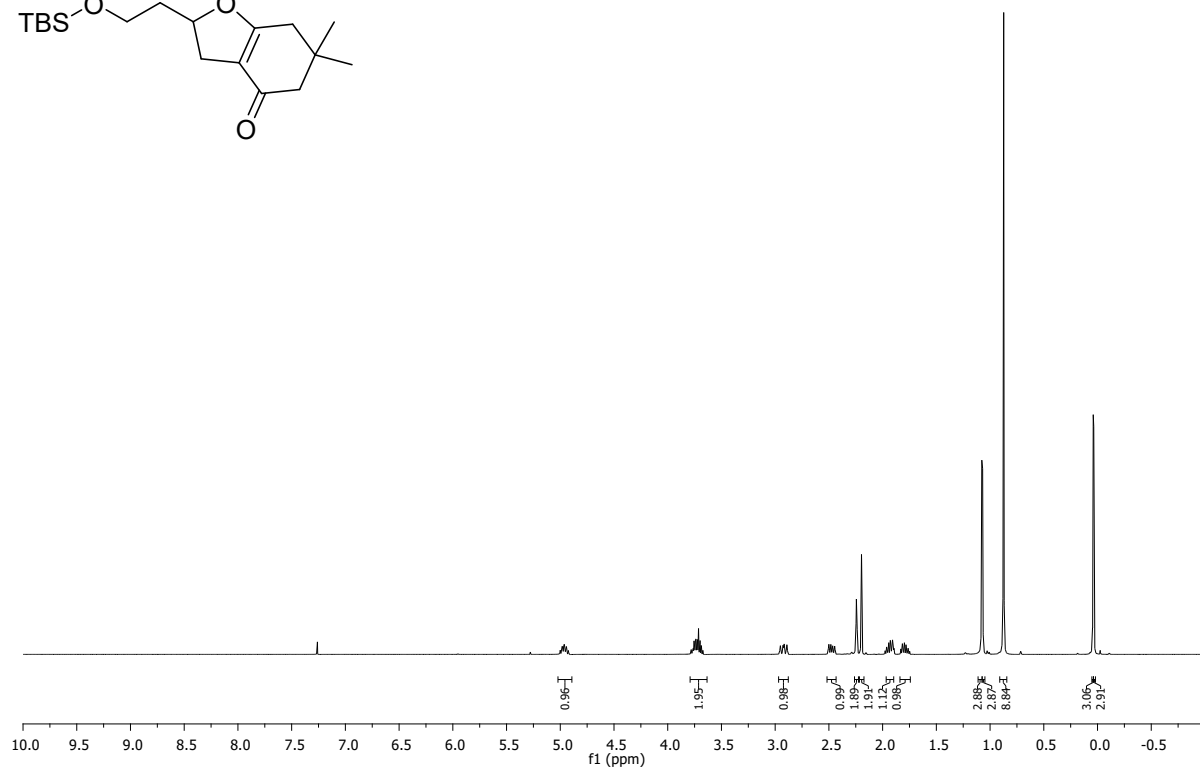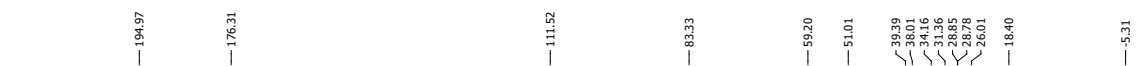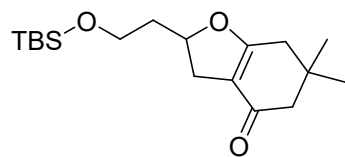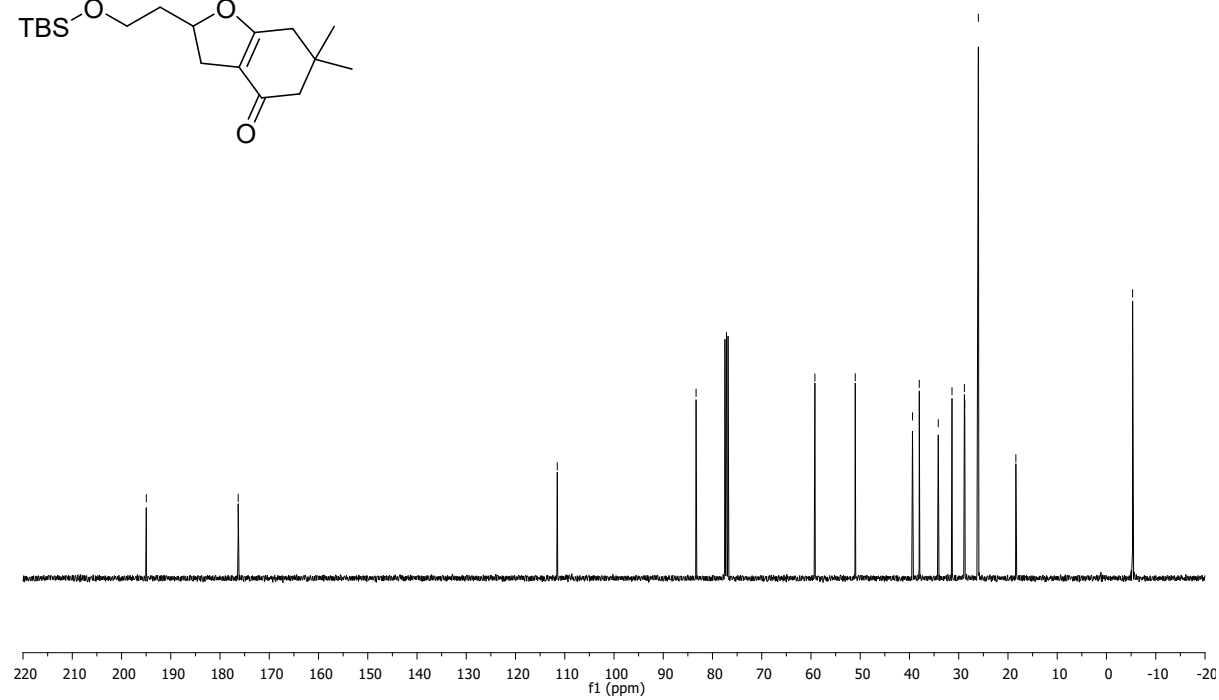

3la

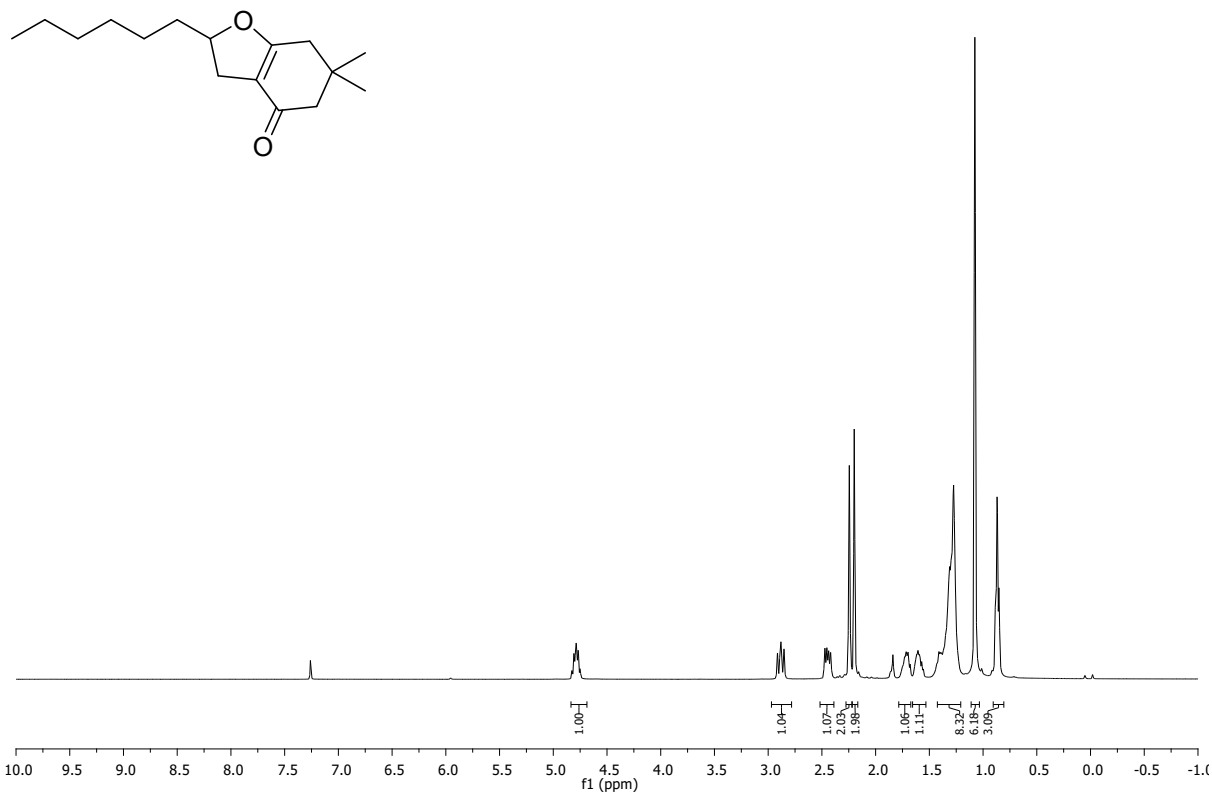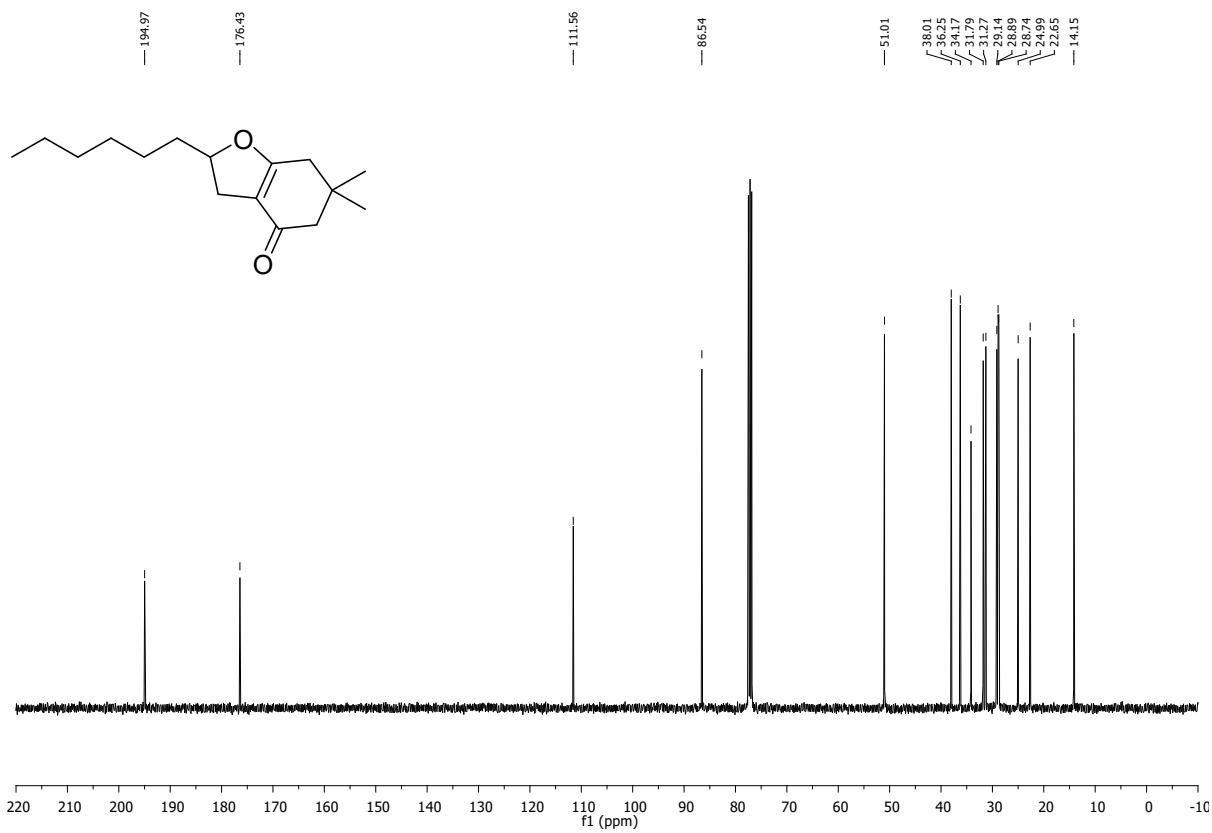

3ma

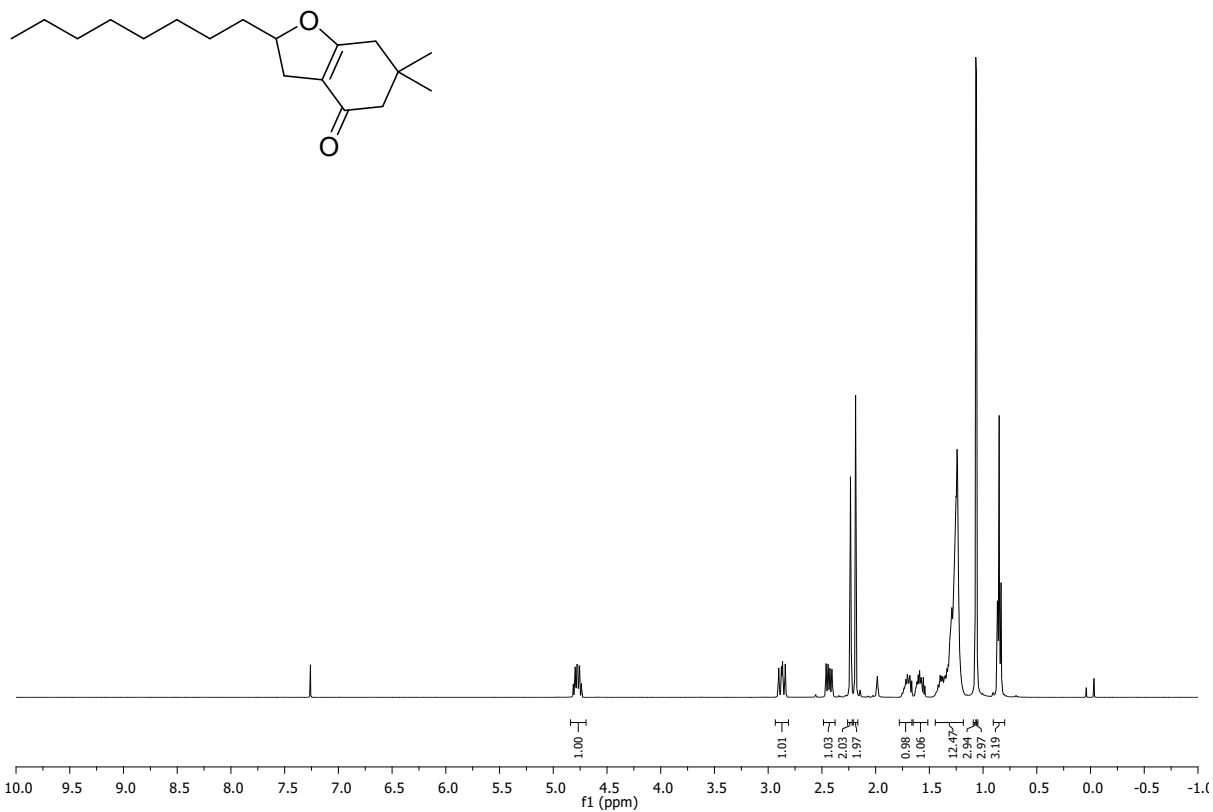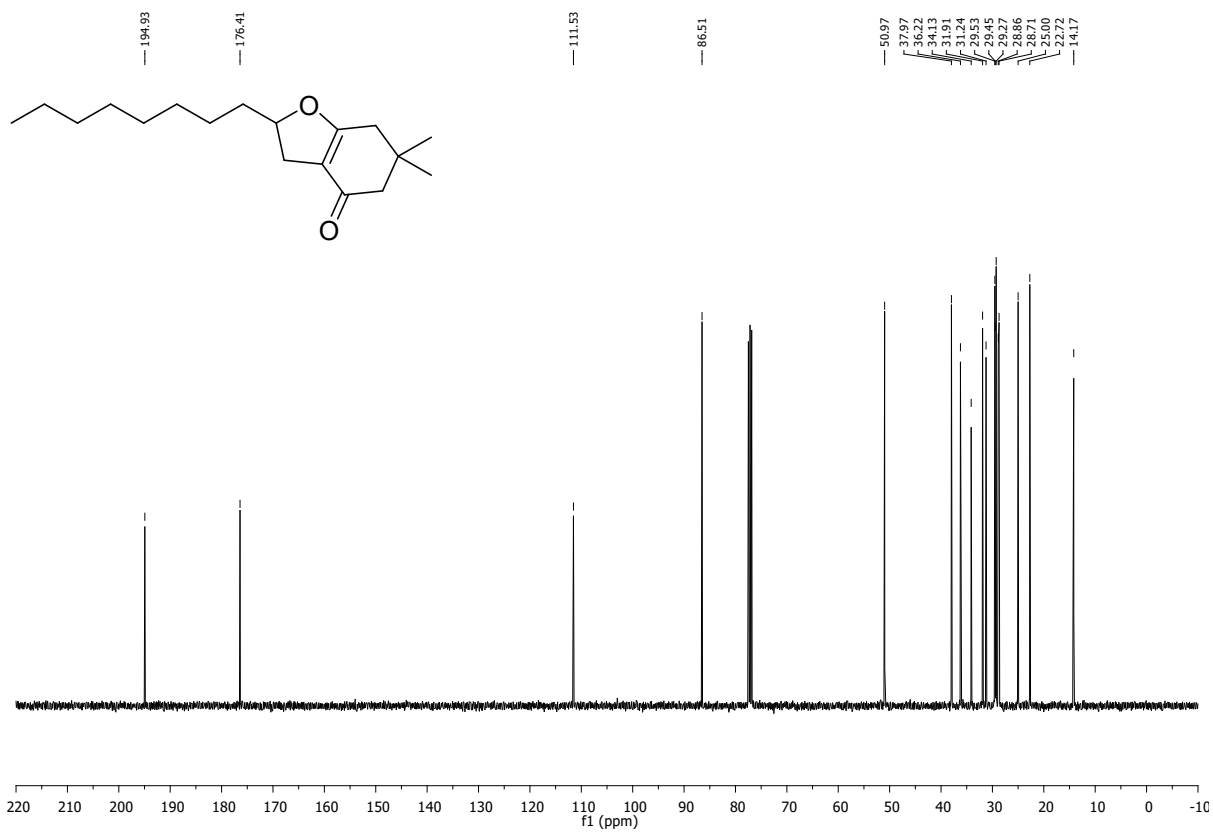

3na

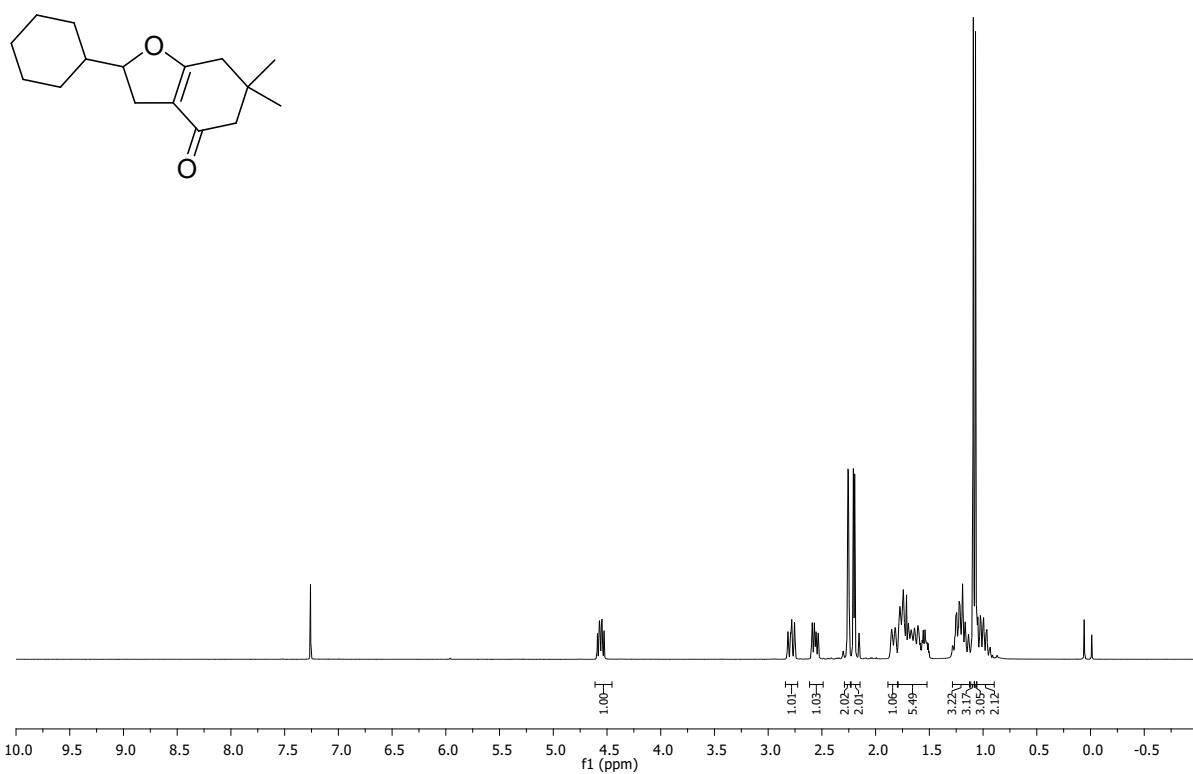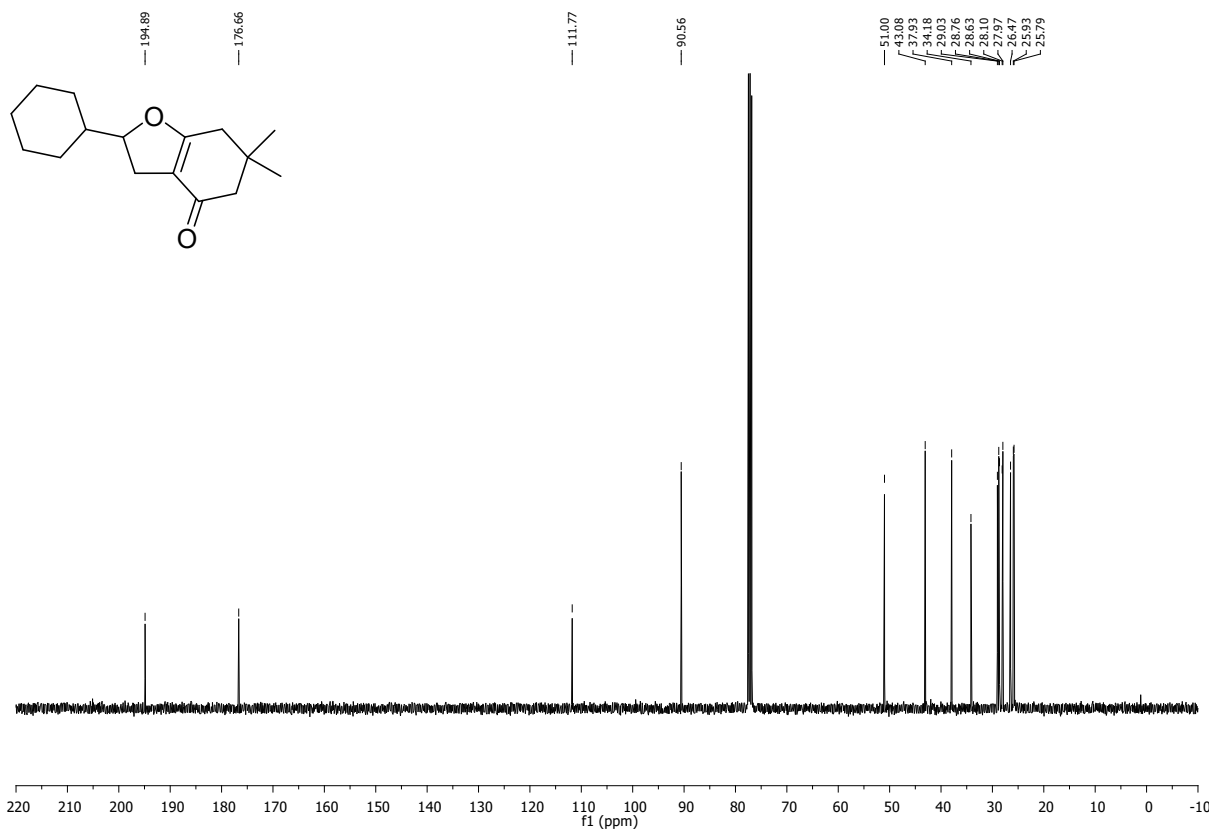

**30a**

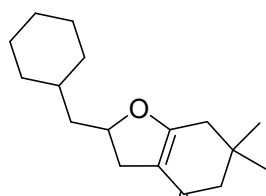

S76

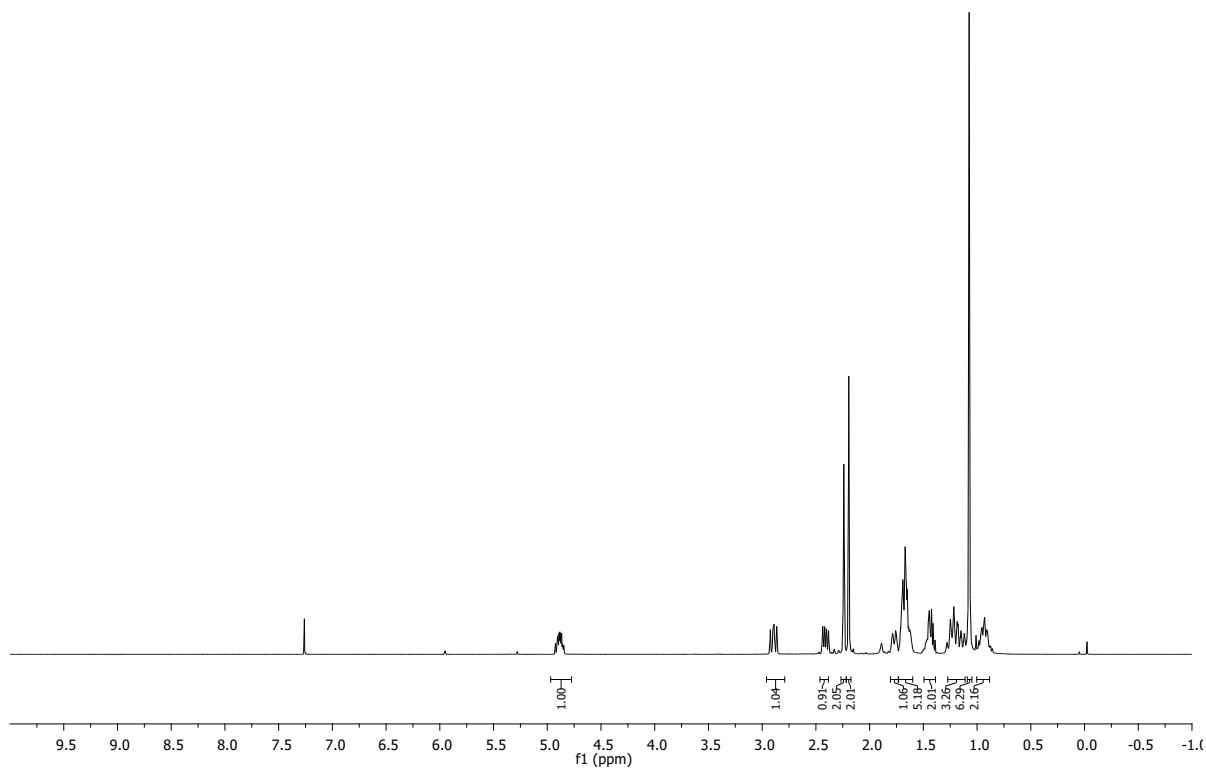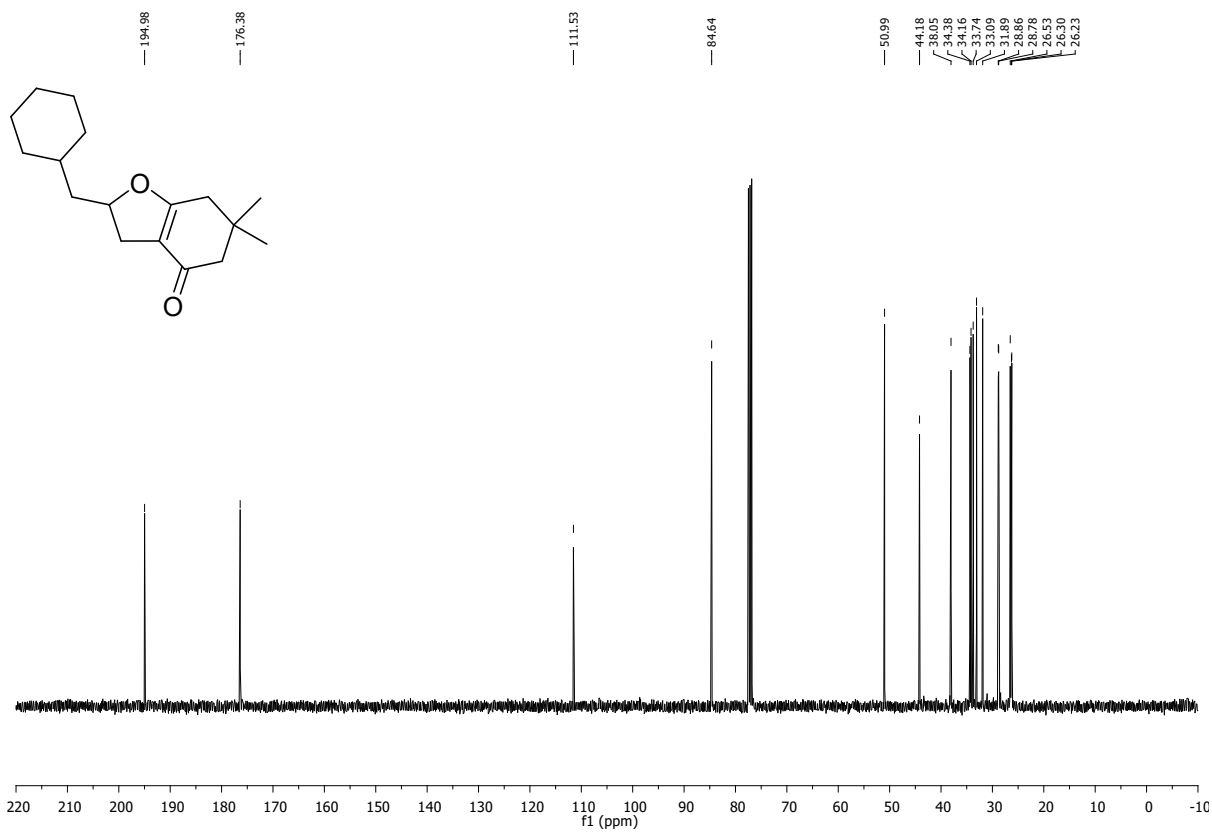

3pa

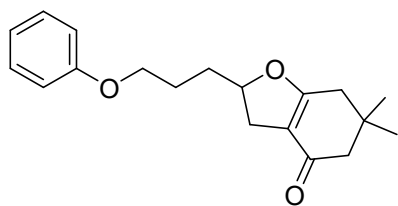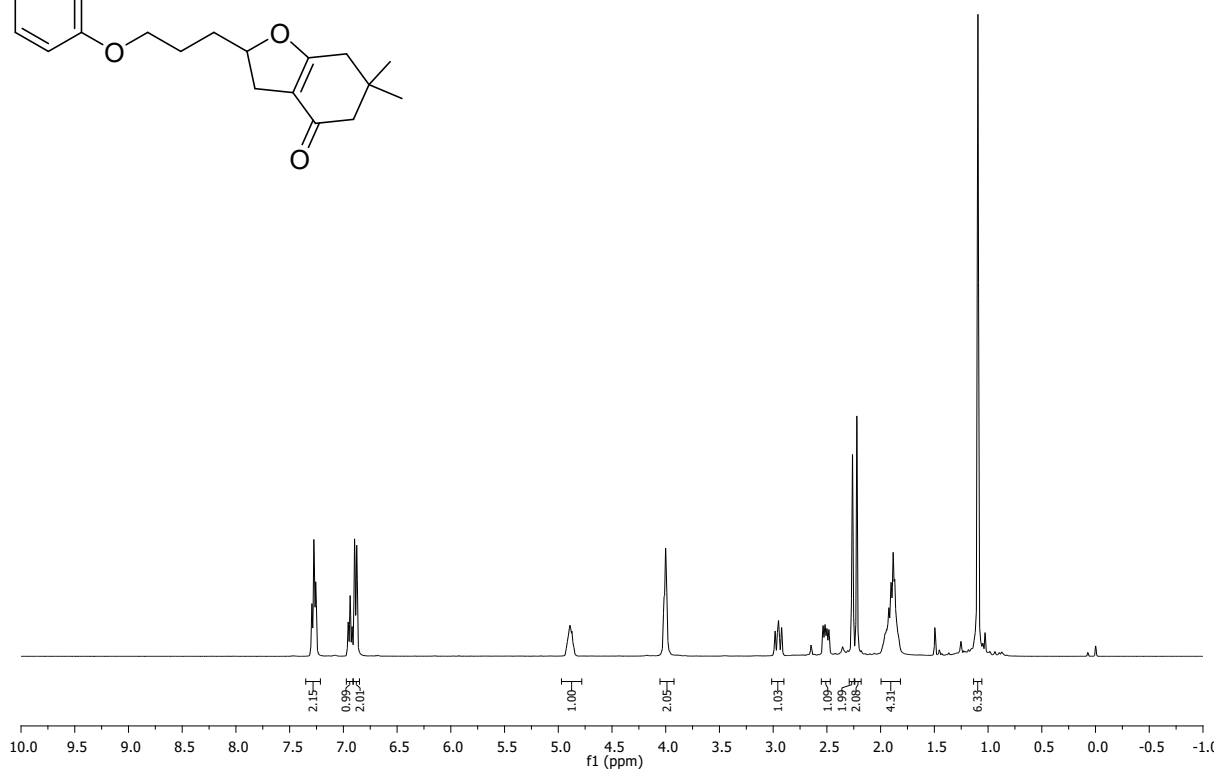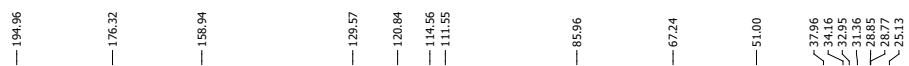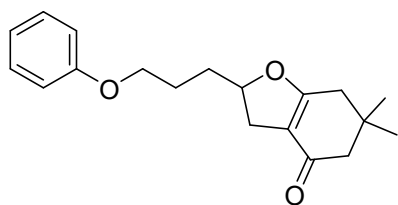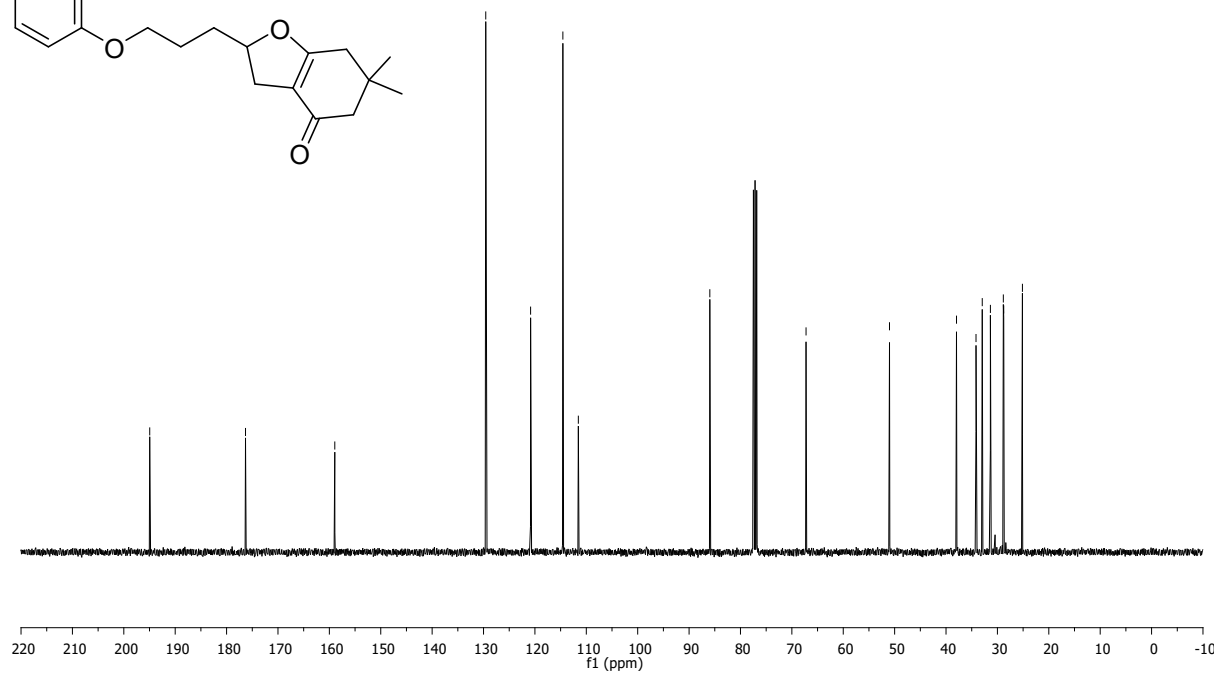

3qa

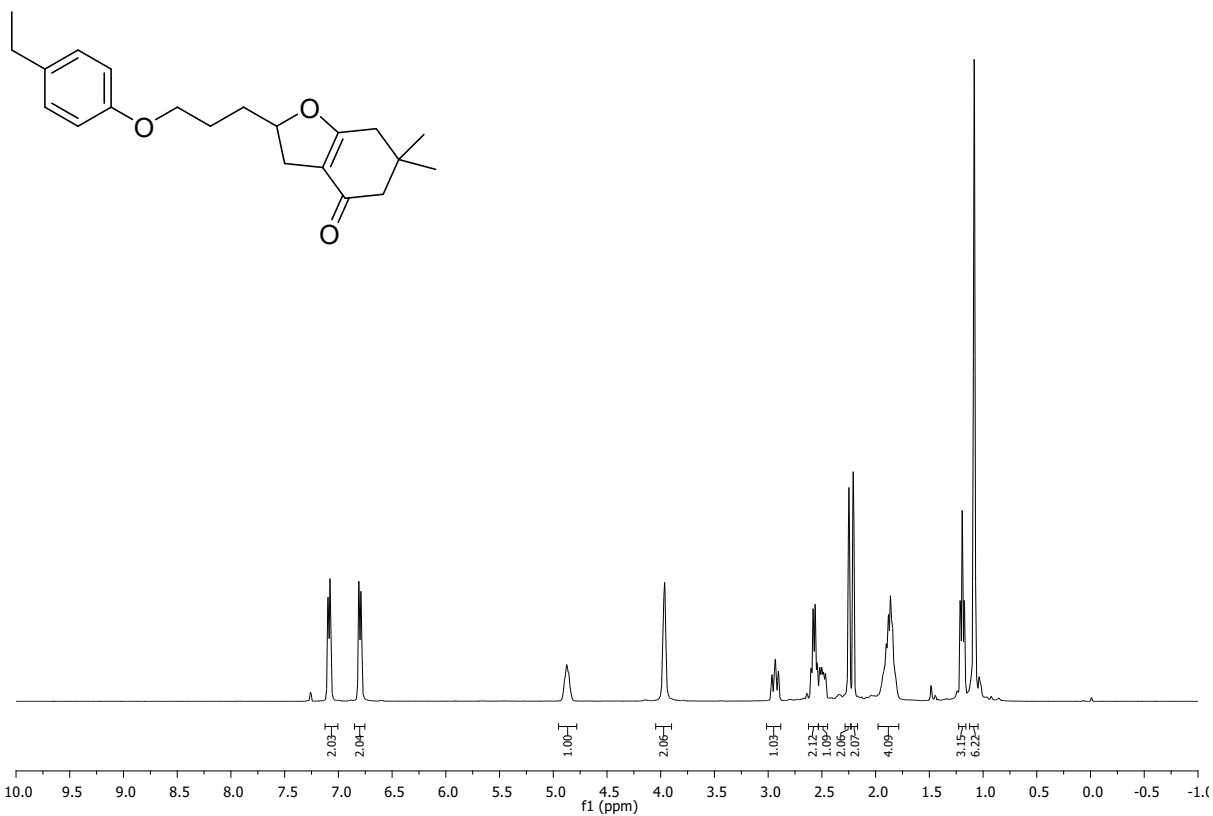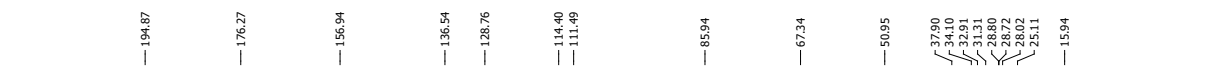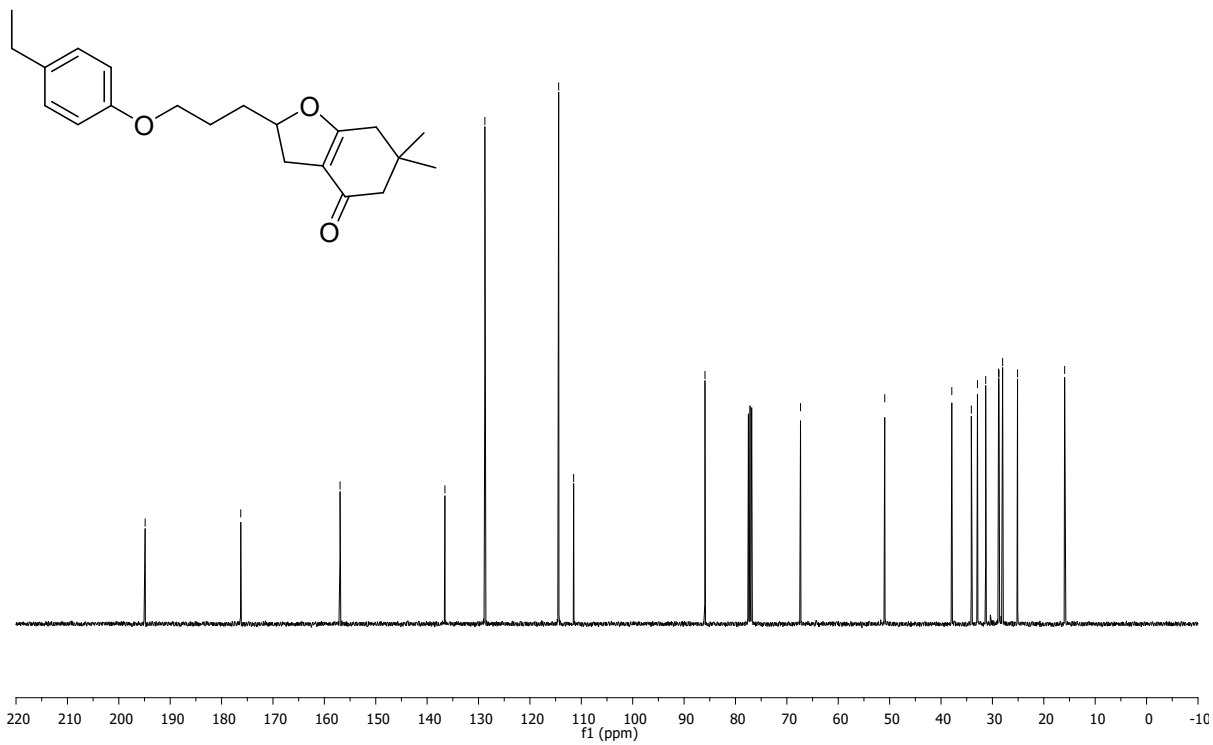

3ra

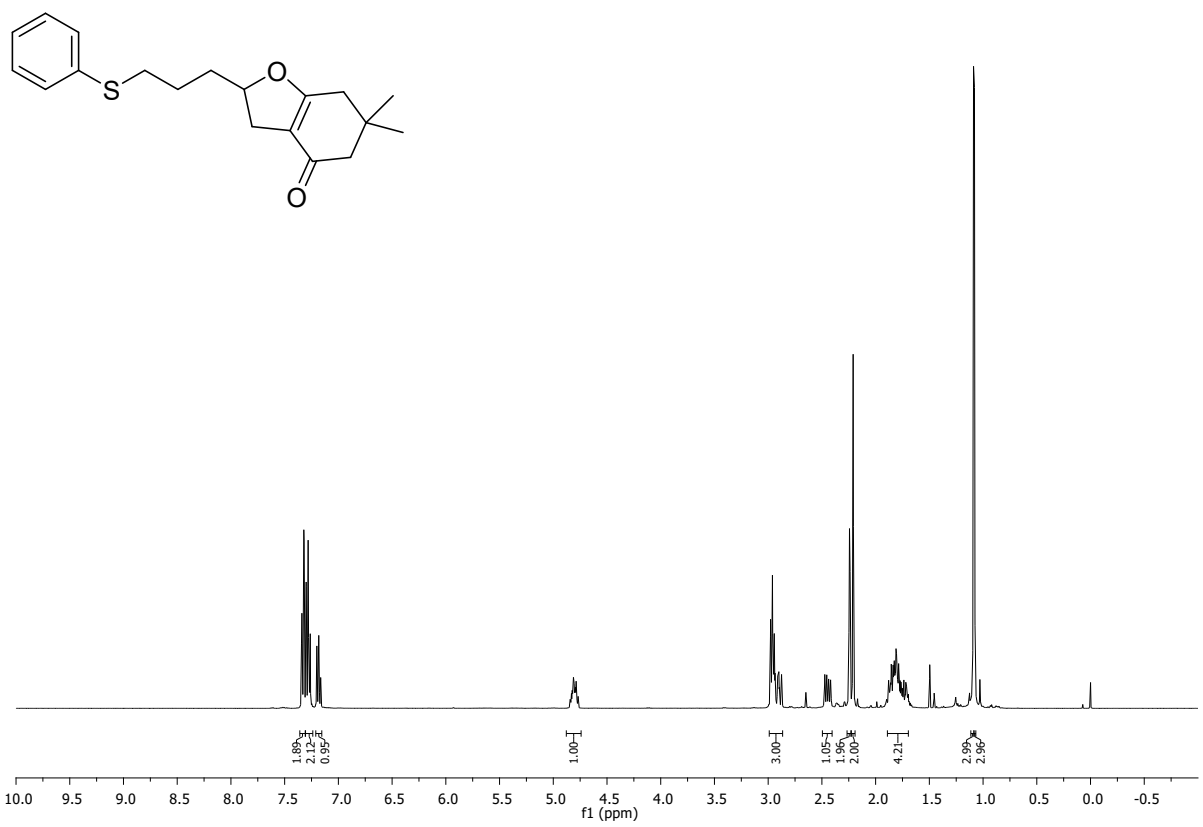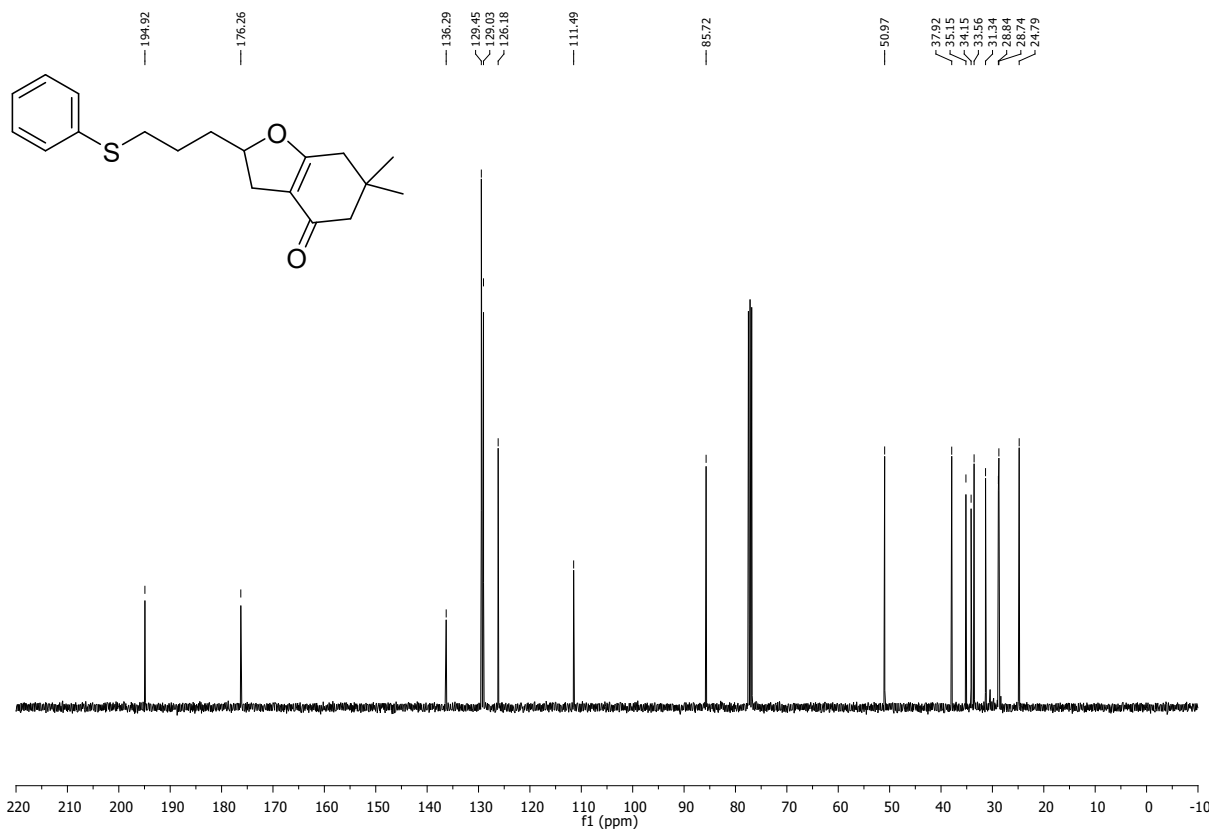

3sa



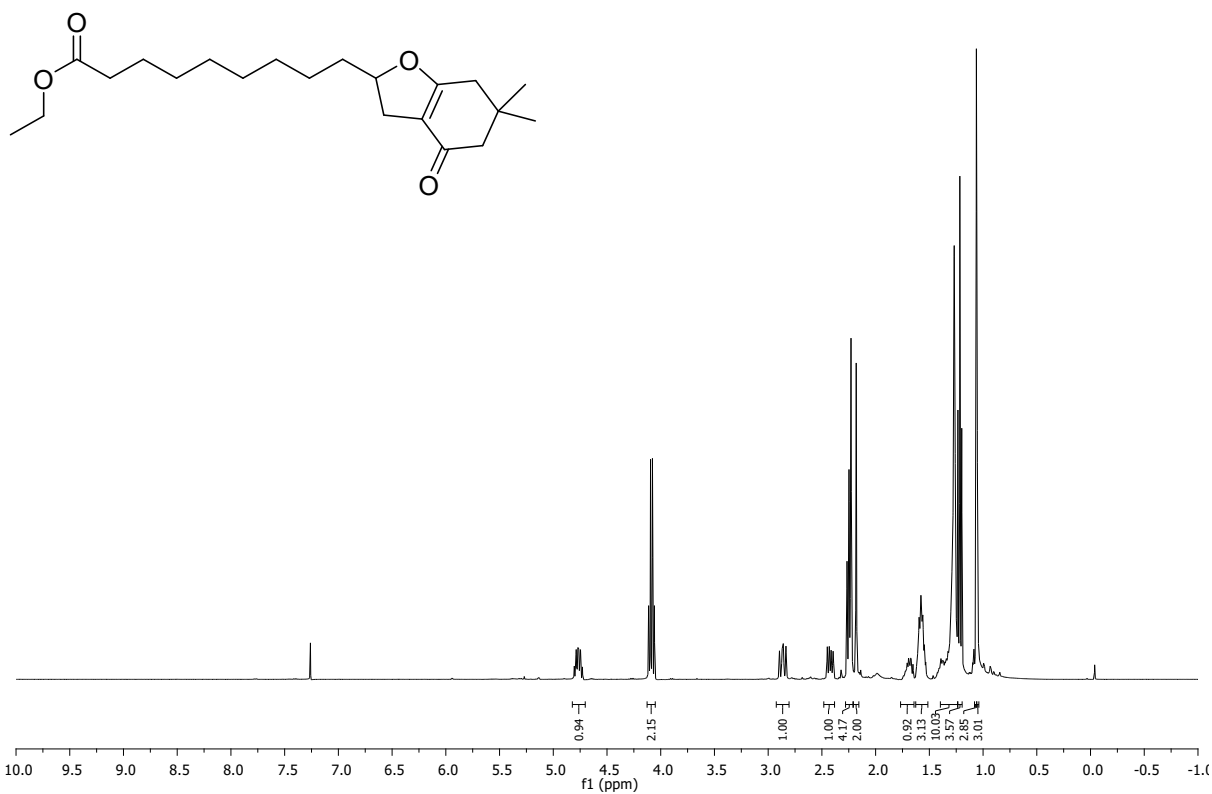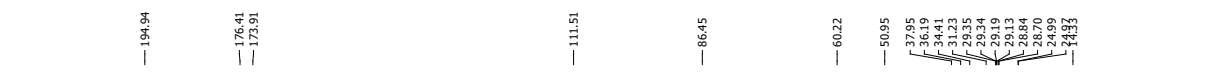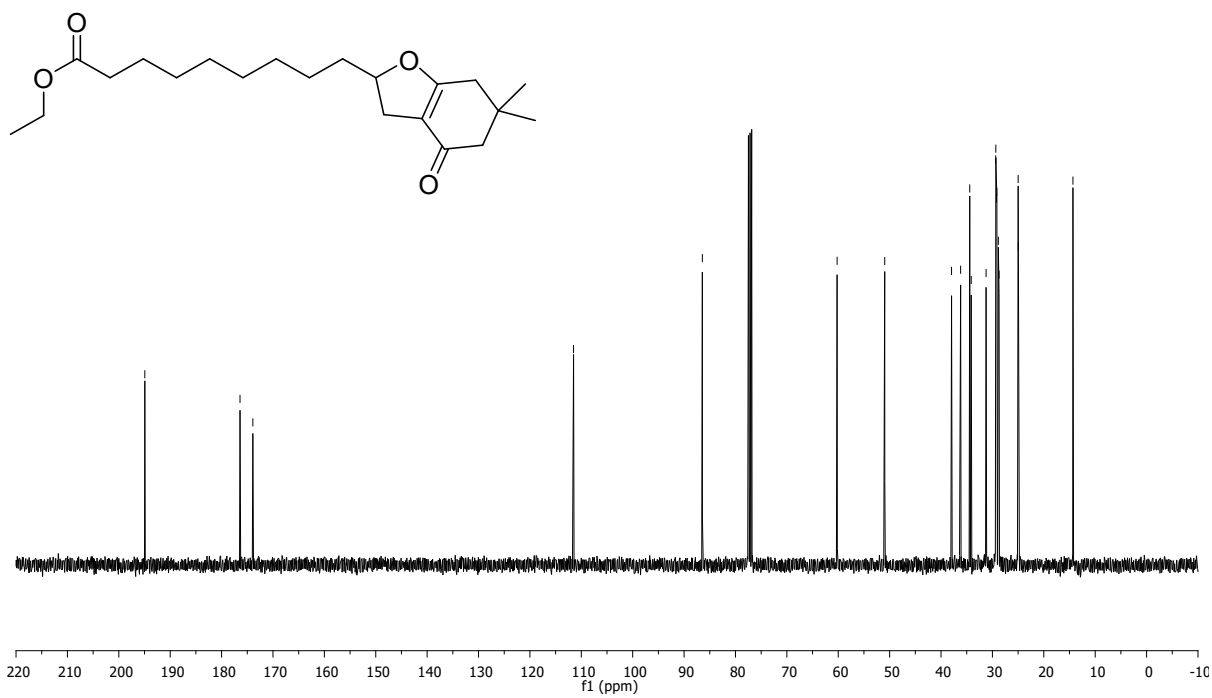

3ta

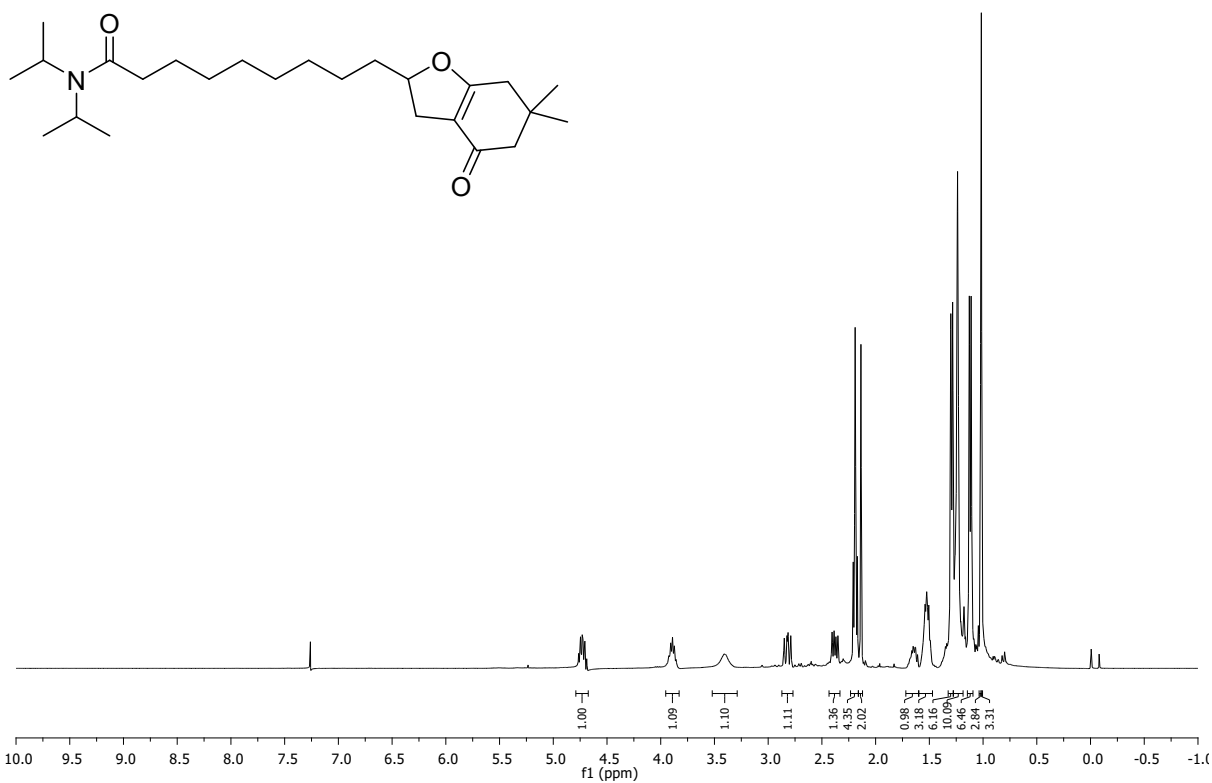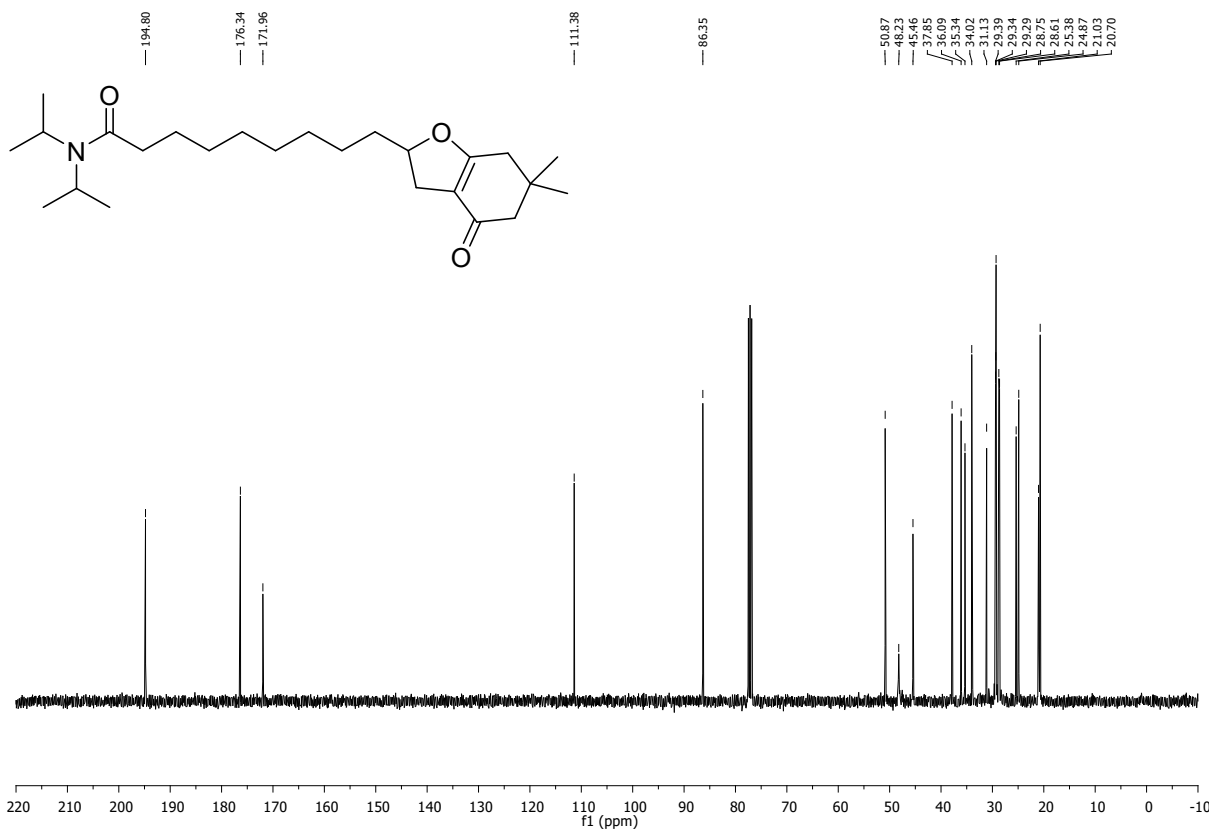

3ua

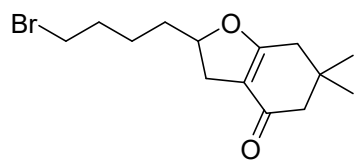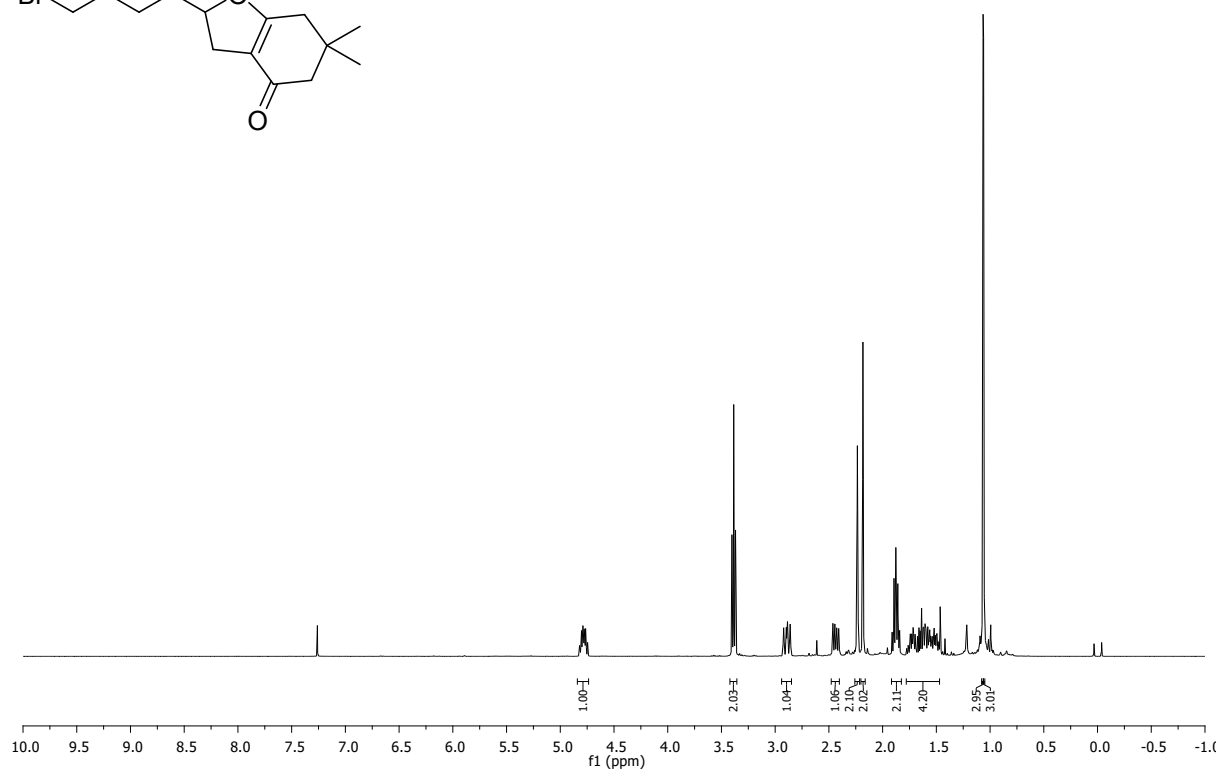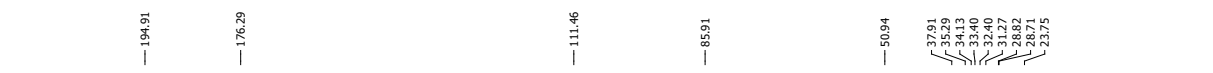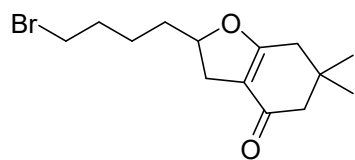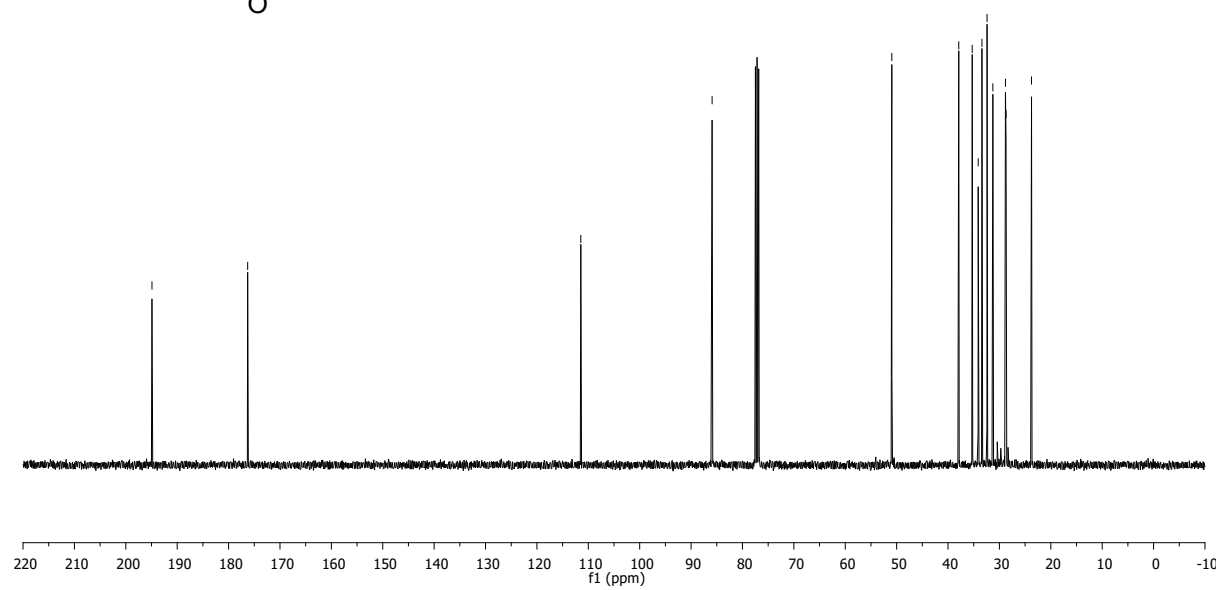

3va

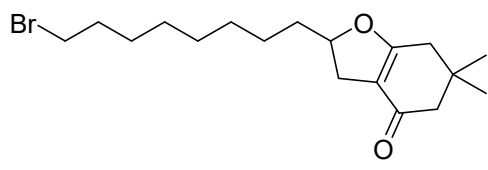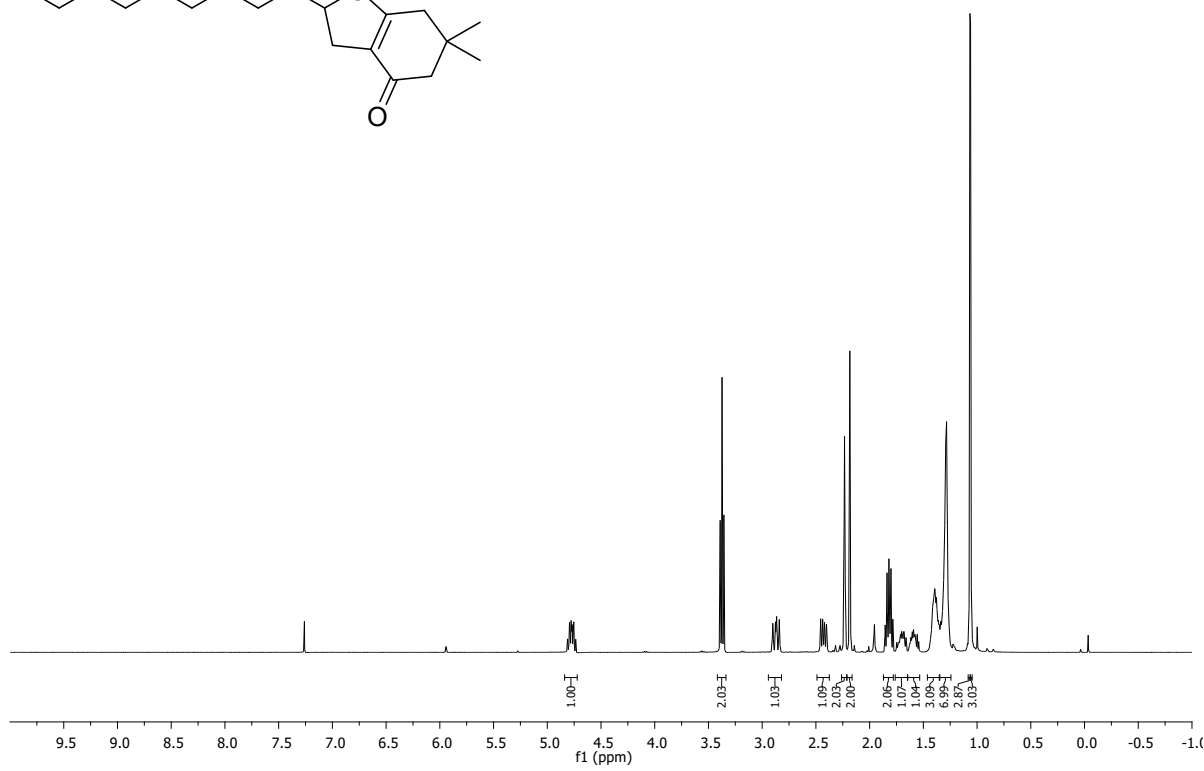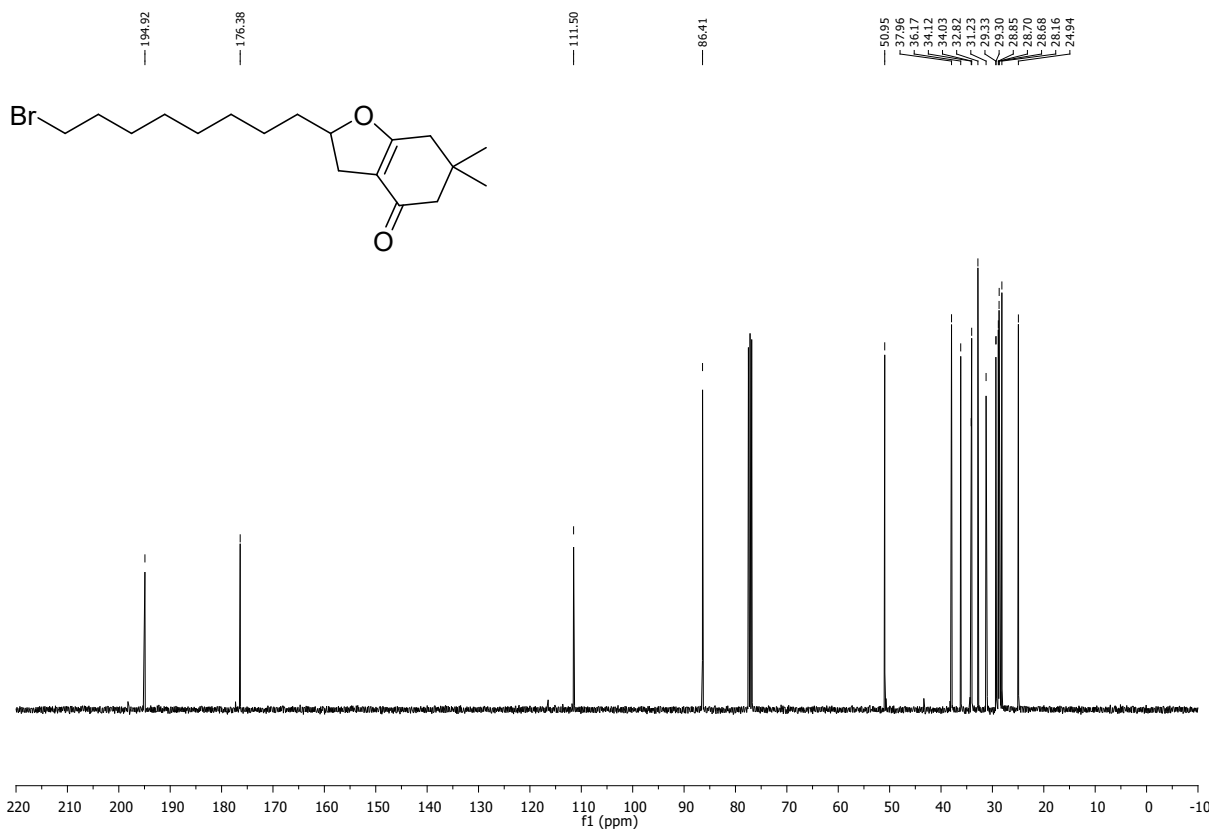

3cb

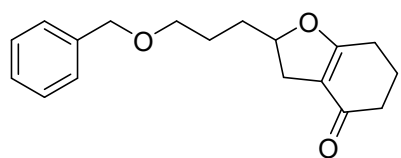

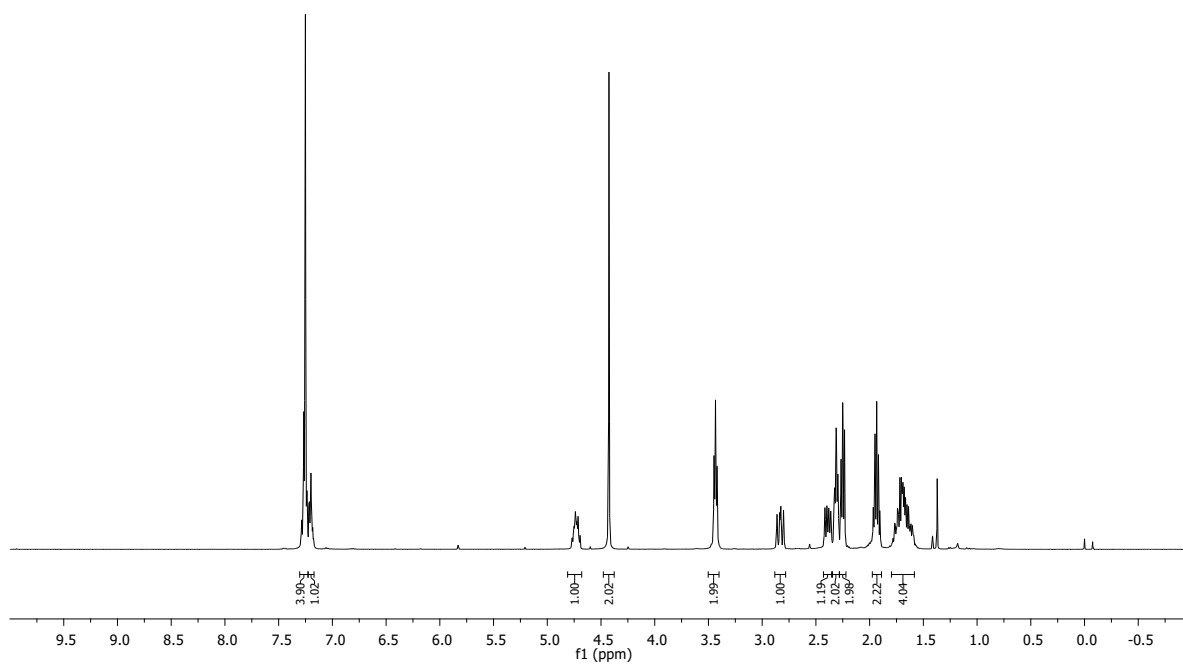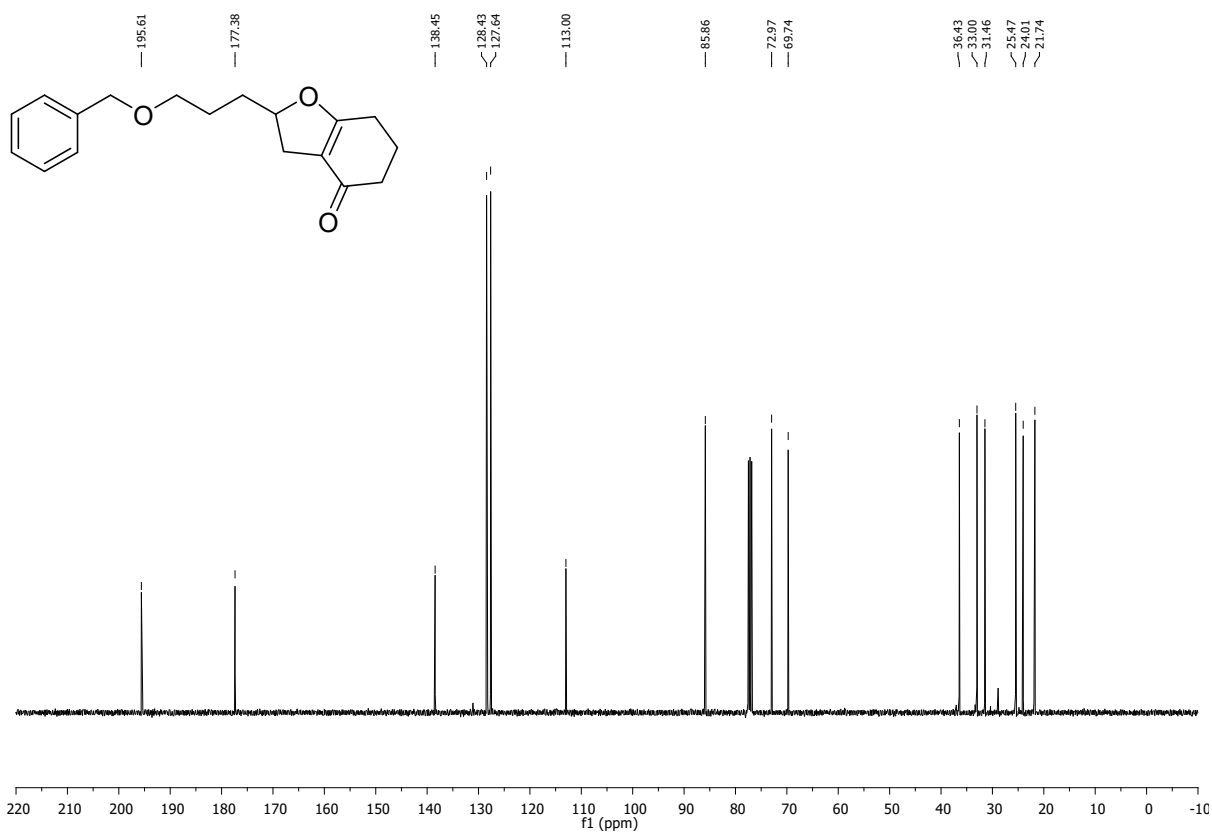

4wa-anti

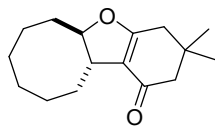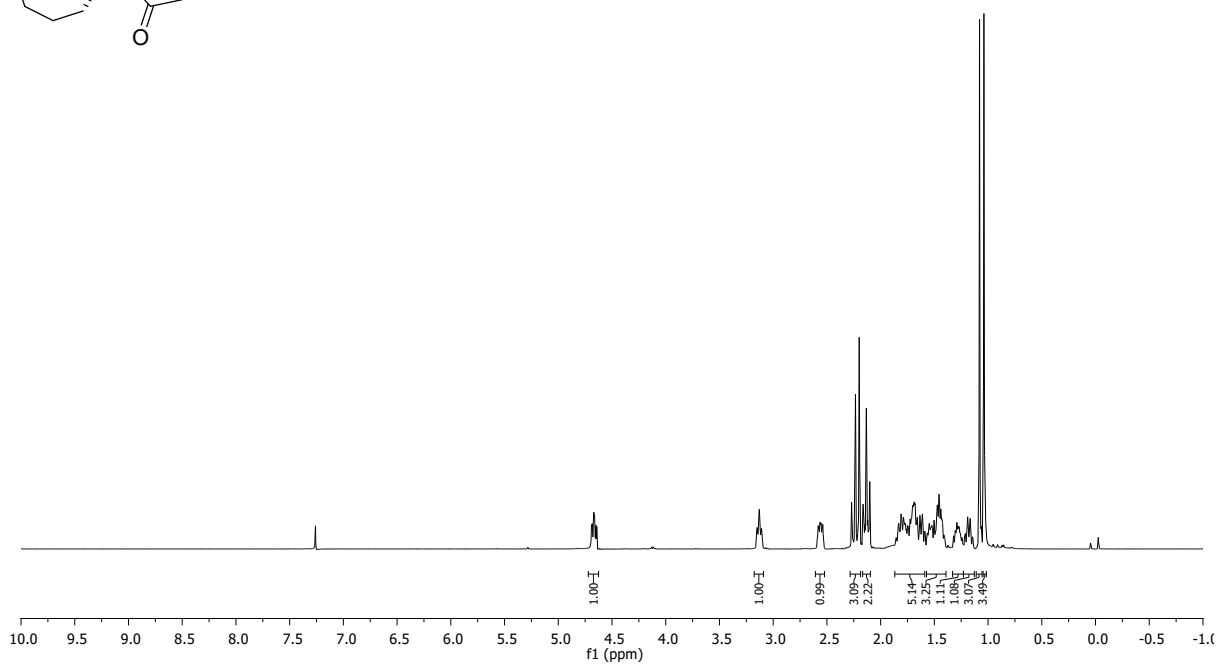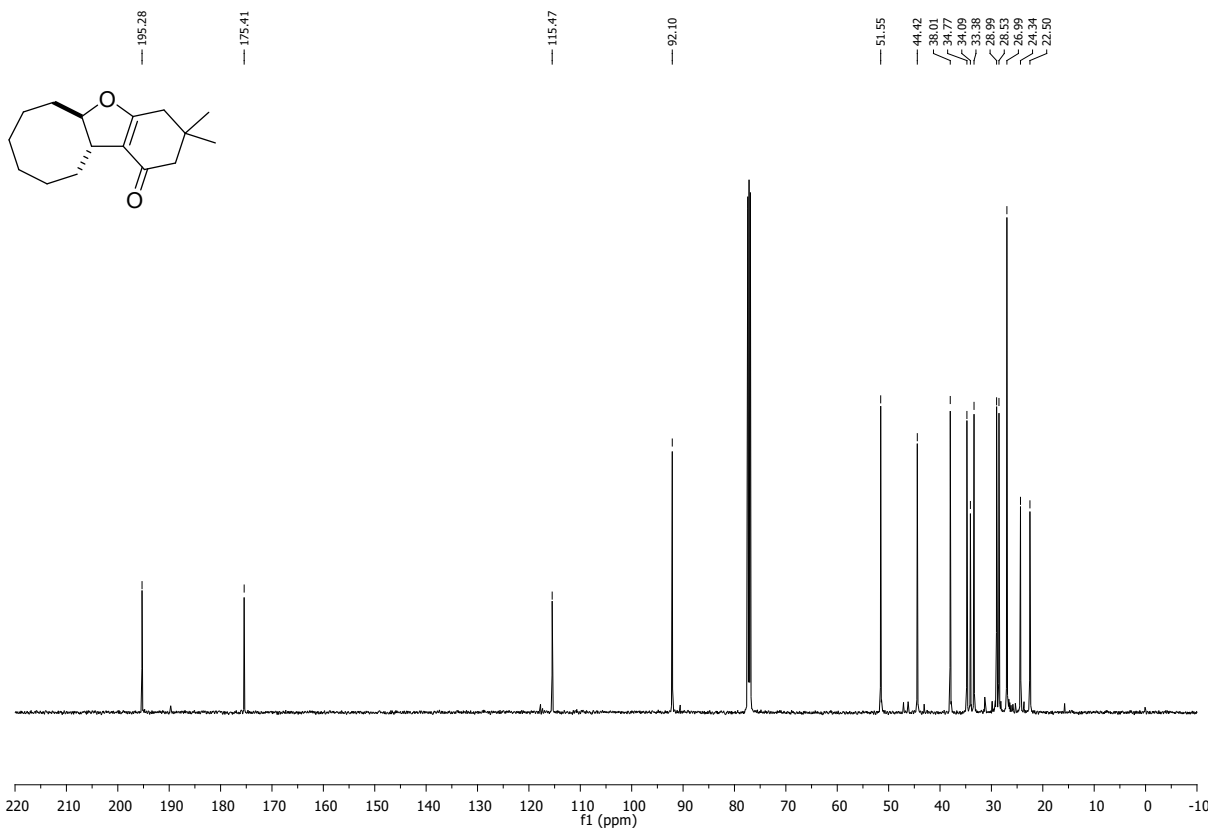

4wa-syn

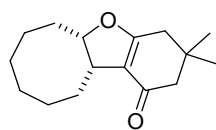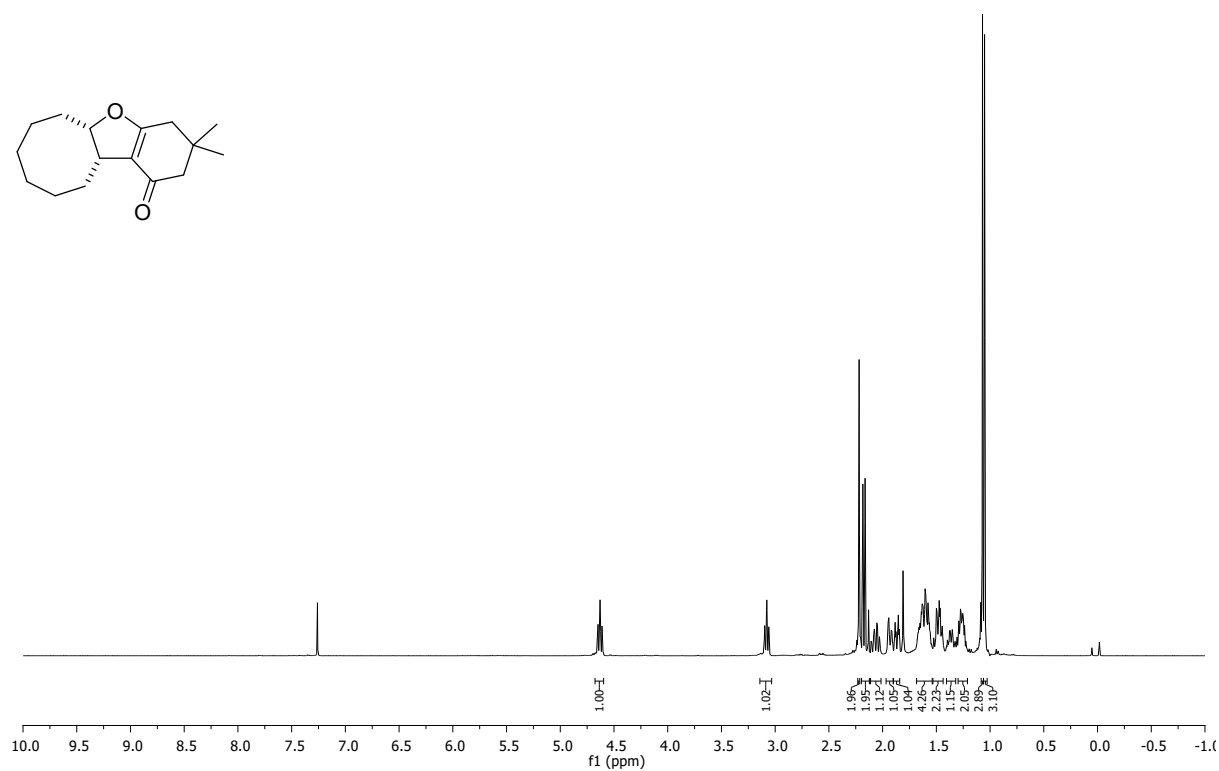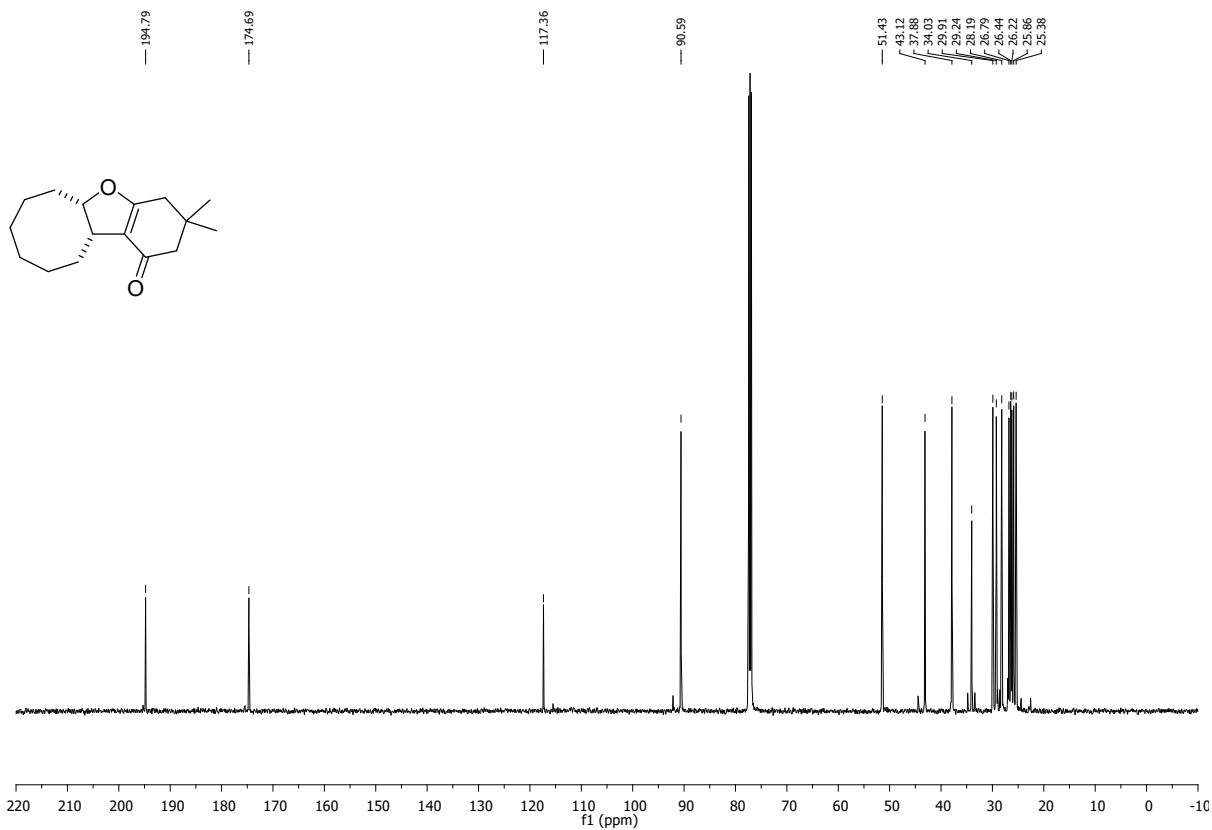

3xa

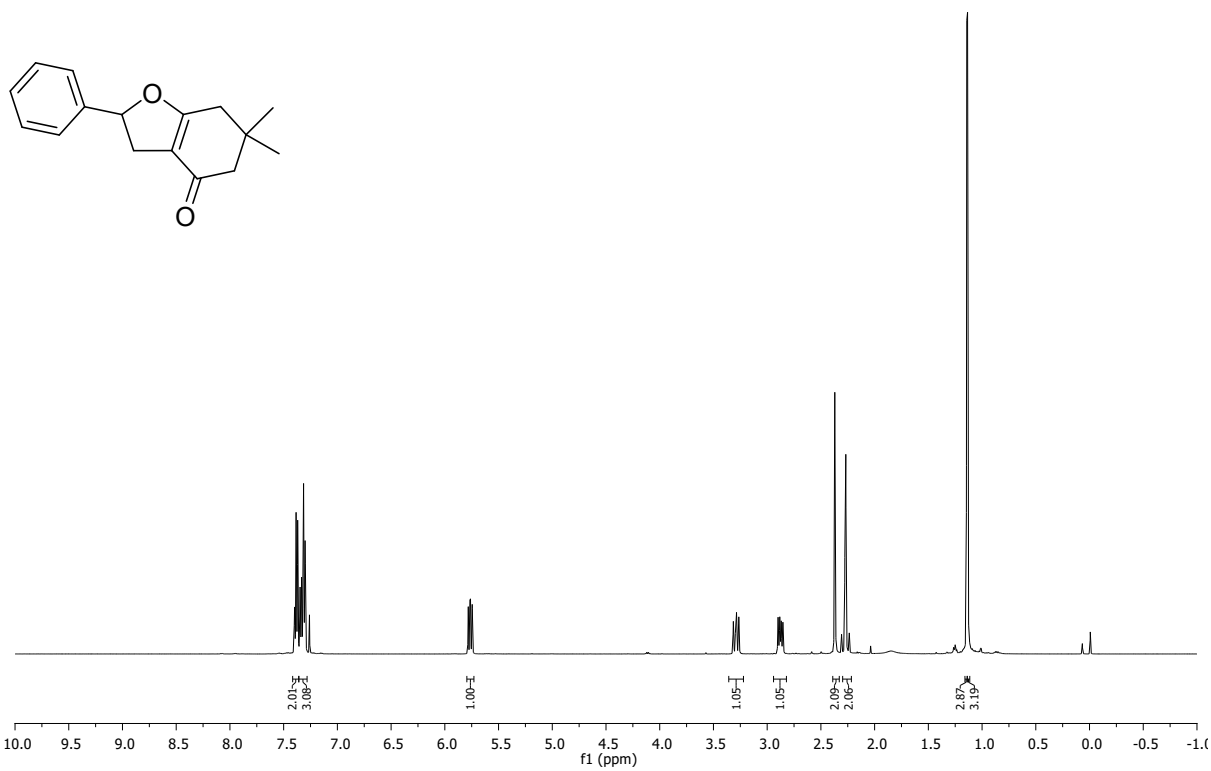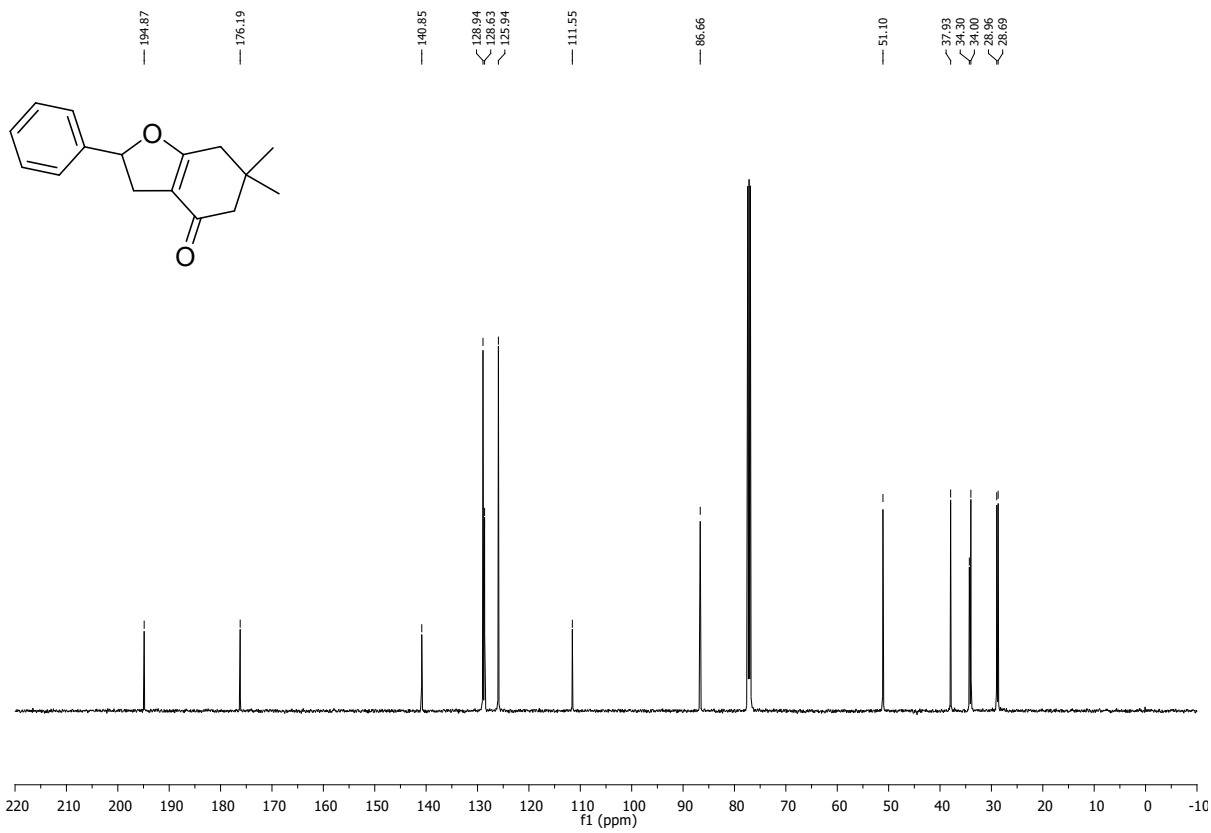

5a'a



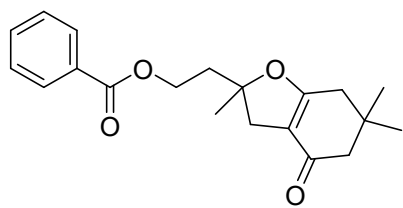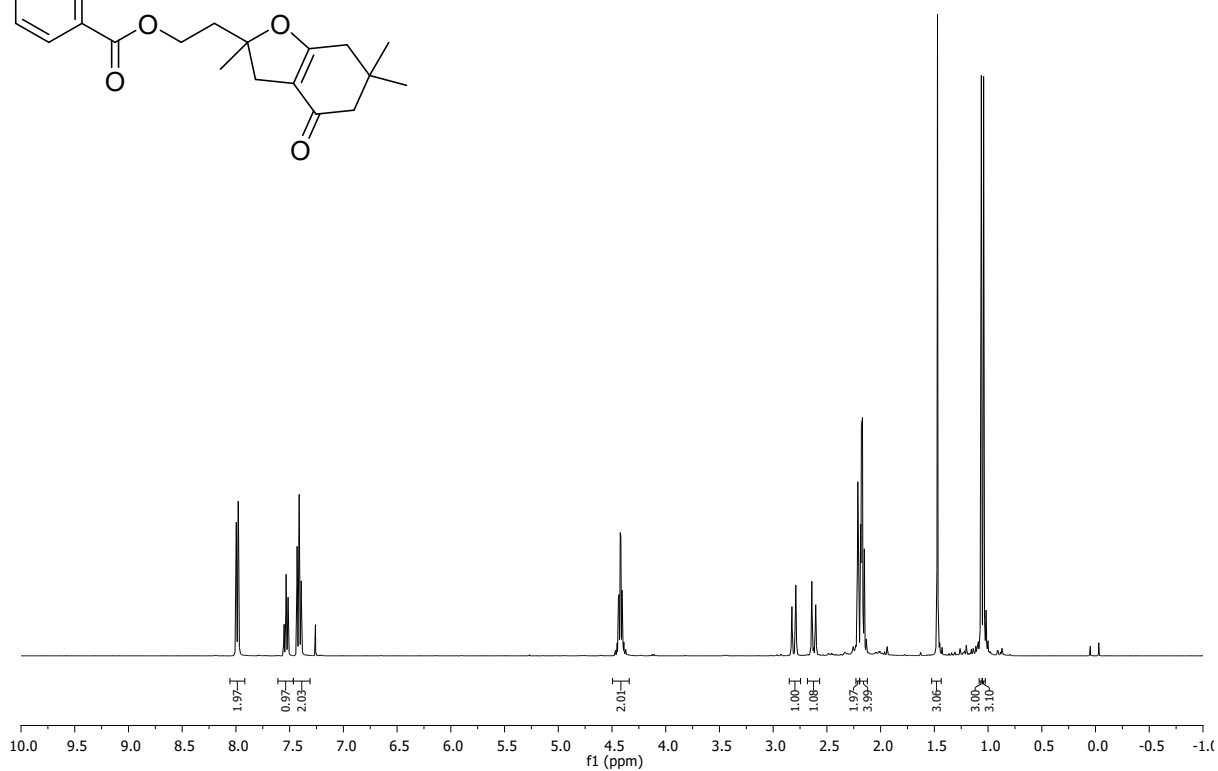

194.97  
175.03  
166.49  
133.13  
130.07  
129.61  
128.46  
111.13  
91.13  
60.82  
50.92  
39.62  
37.94  
37.80  
34.11  
33.65  
27.11

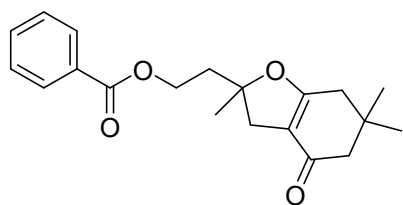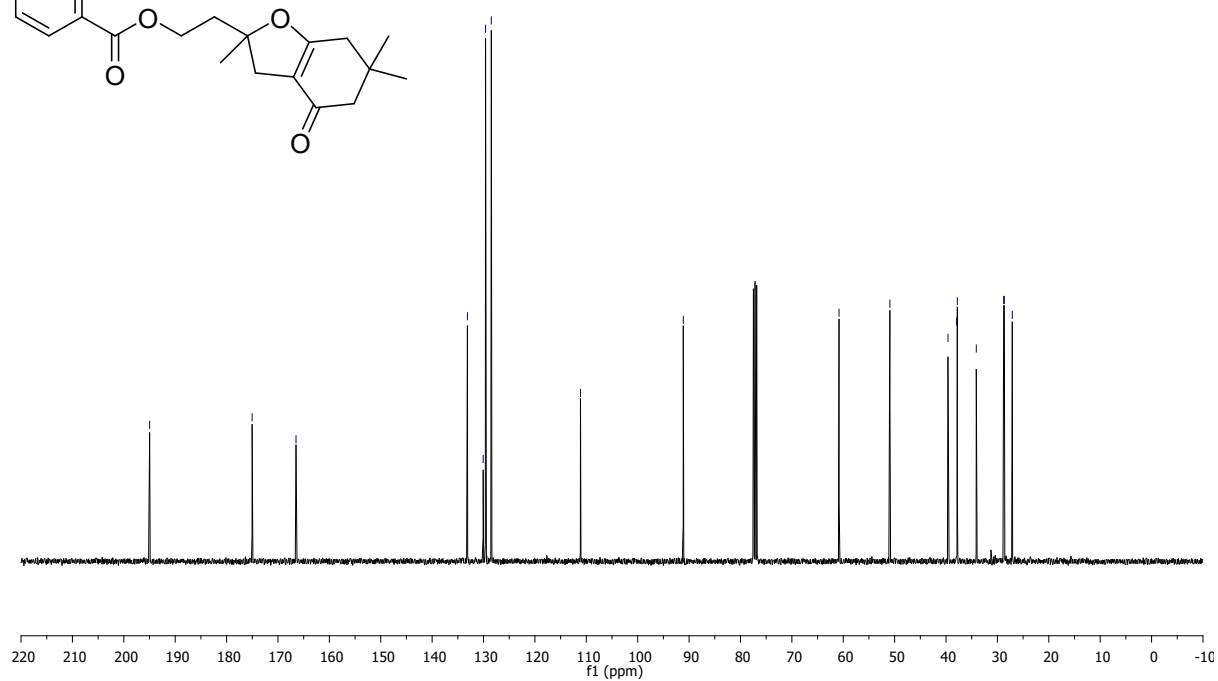

4ya

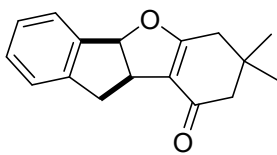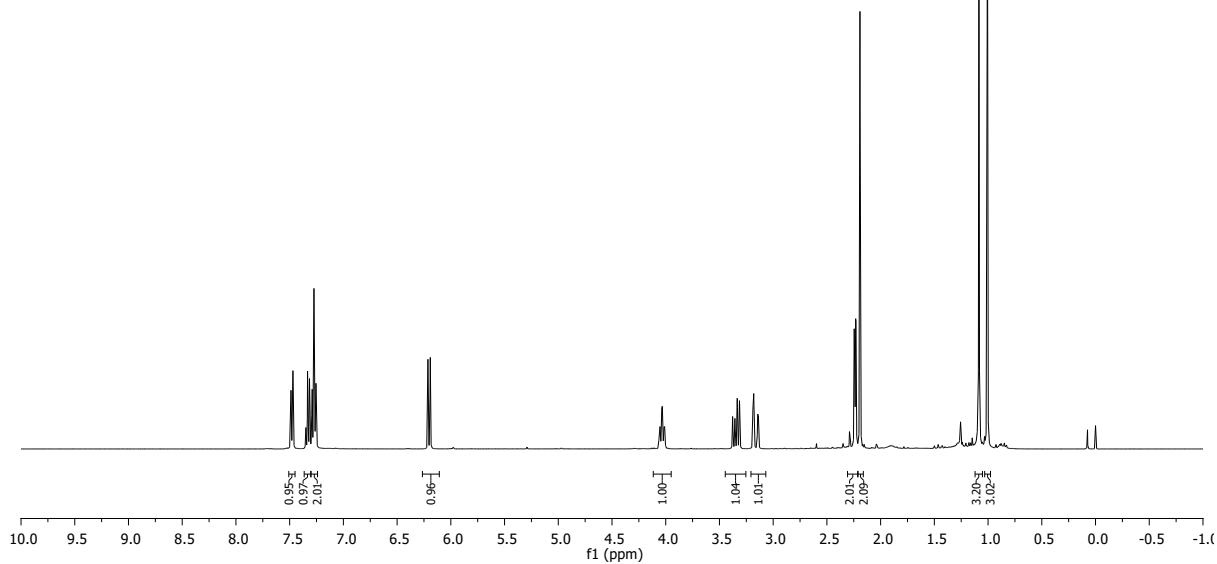

195.01  
175.56  
143.47  
139.50  
129.90  
127.15  
125.93  
125.70  
115.44  
93.72  
51.25  
41.63  
37.99  
37.53  
36.11  
29.11  
28.35

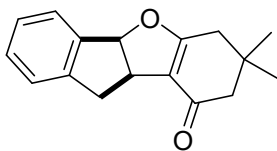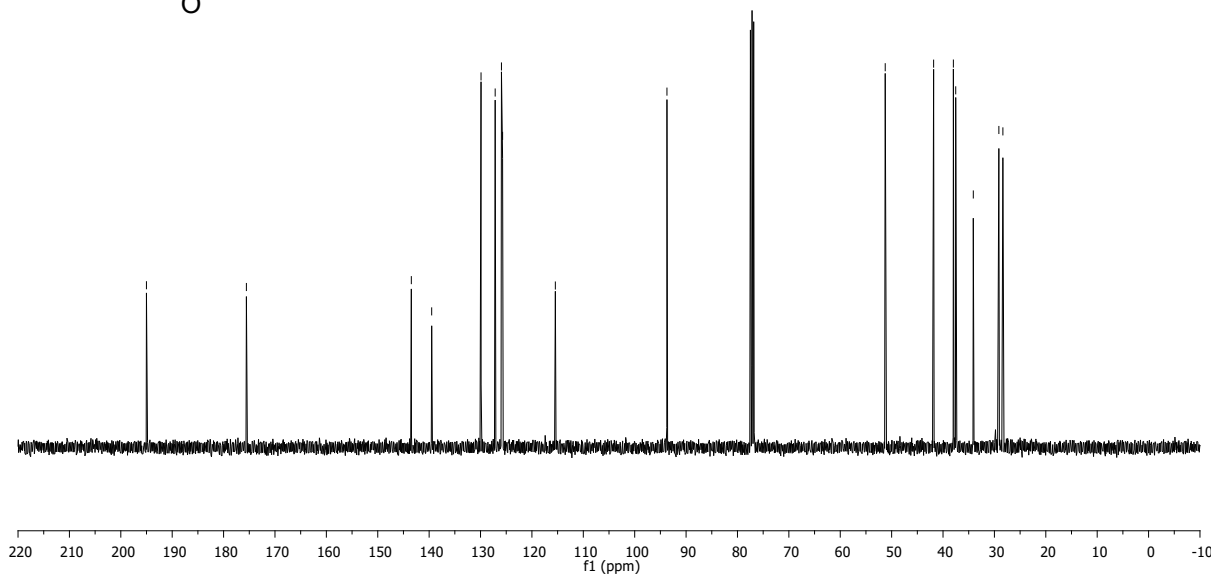

4za

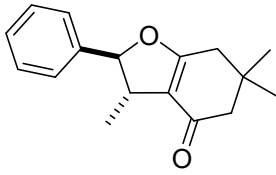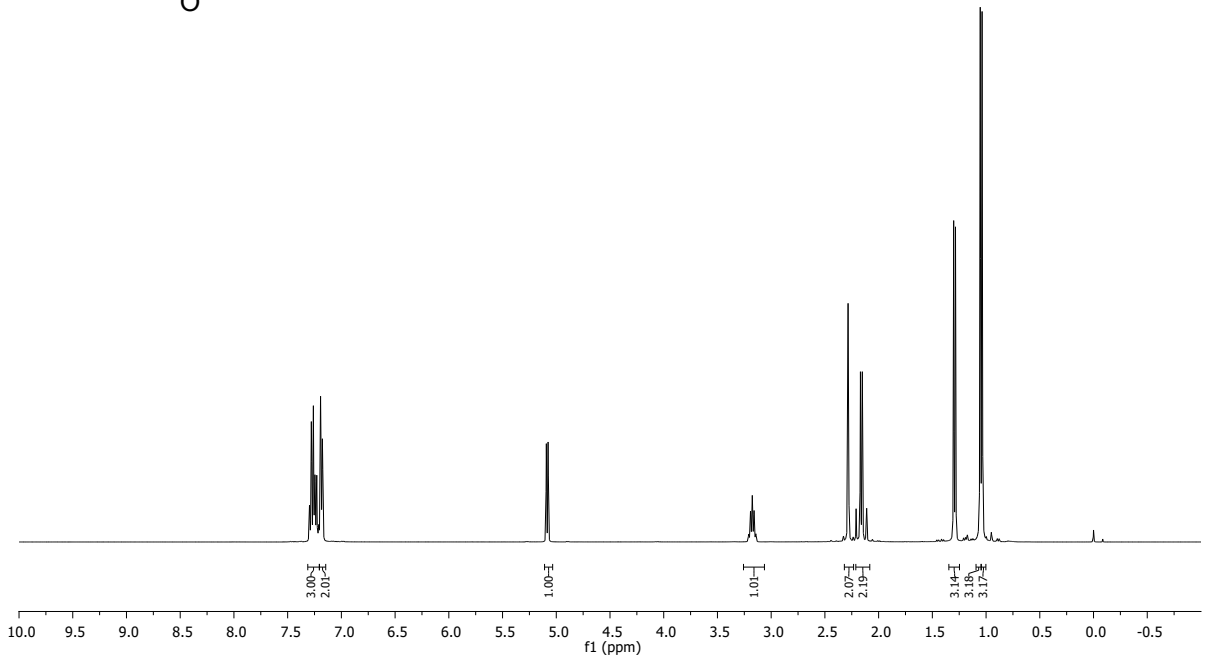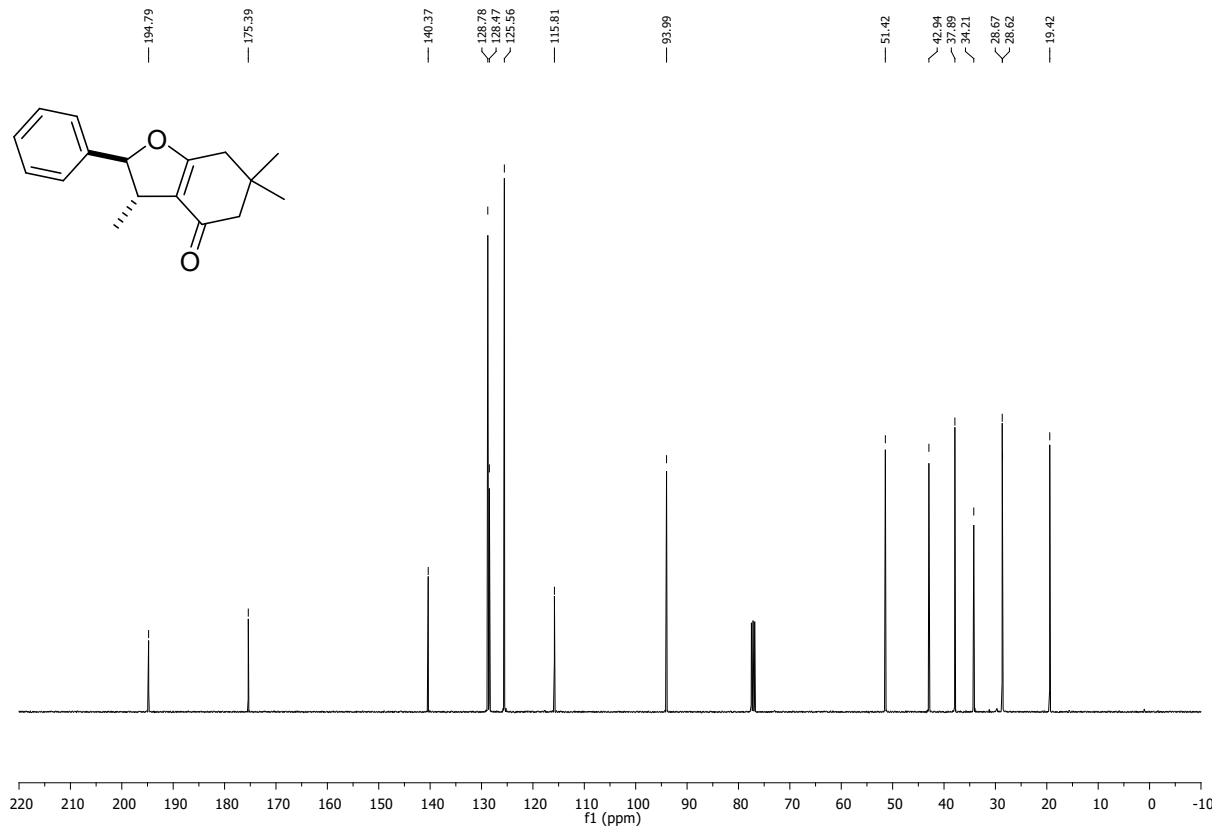

3ac

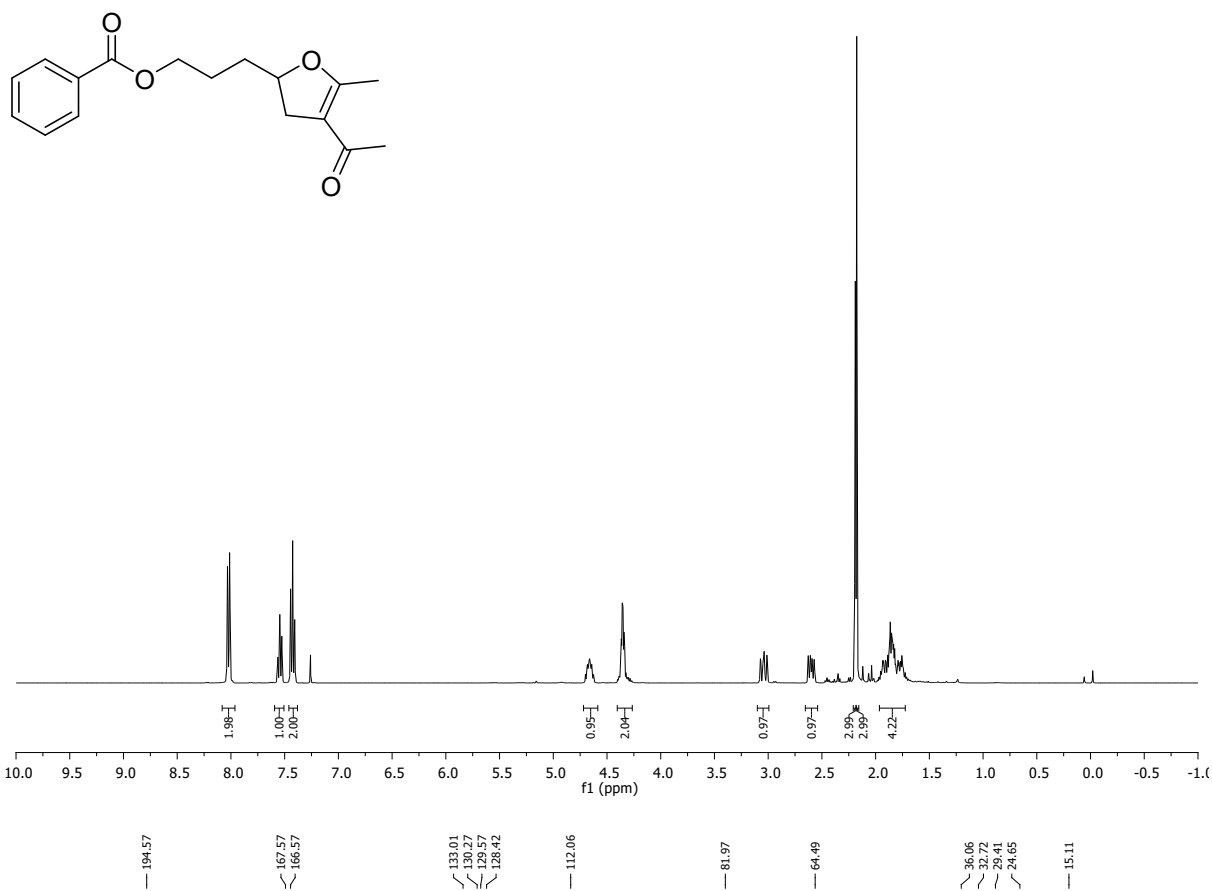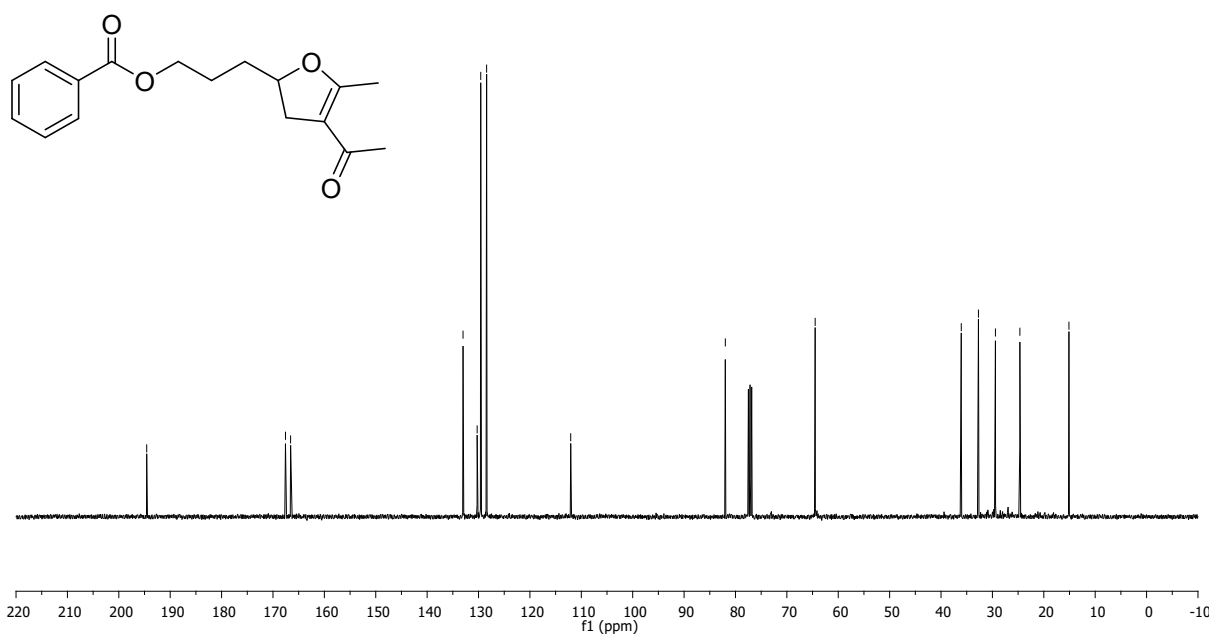

3ad

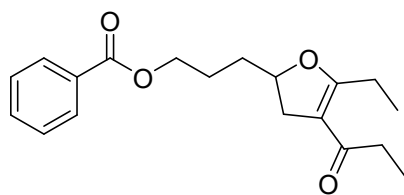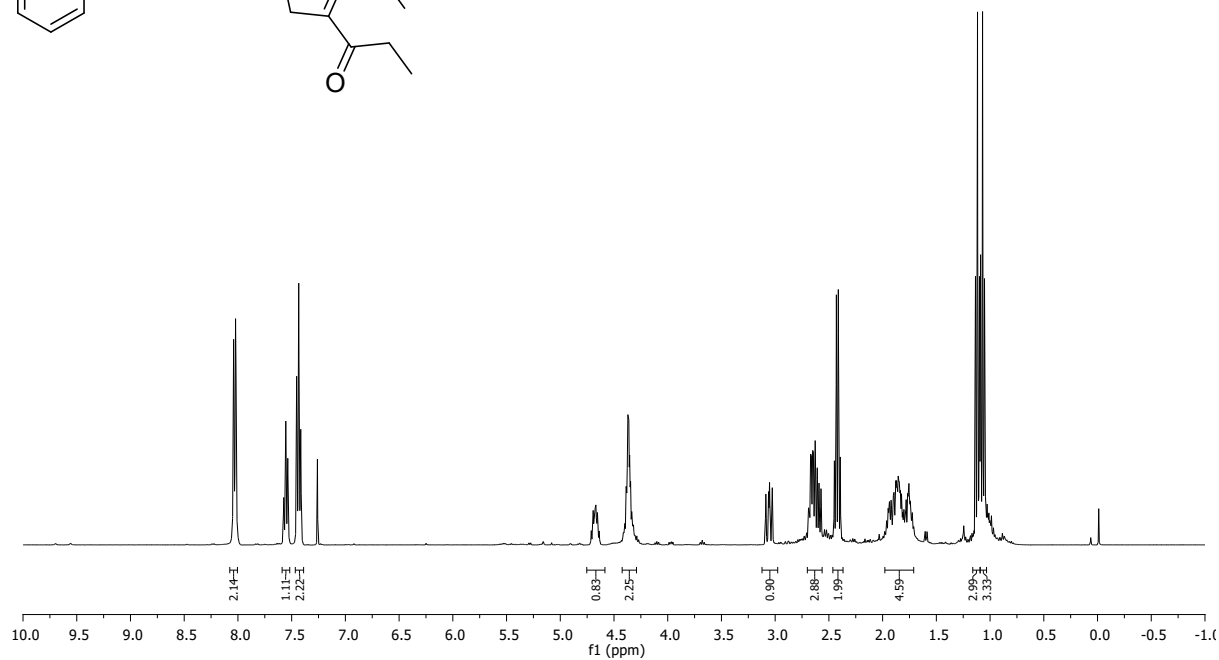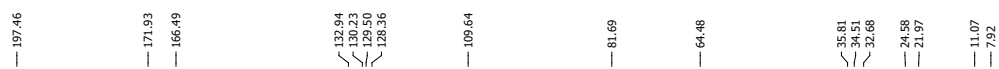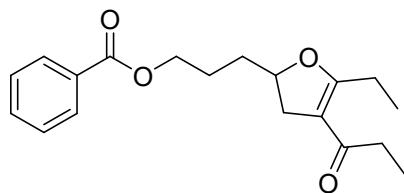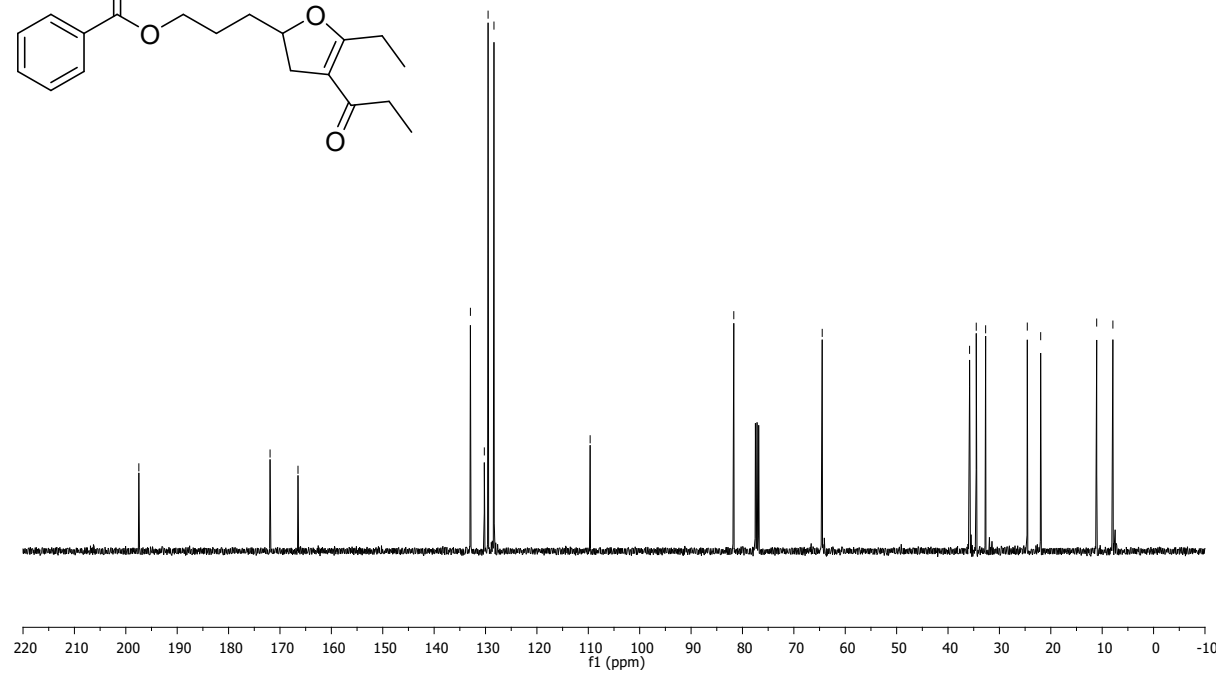

3ae

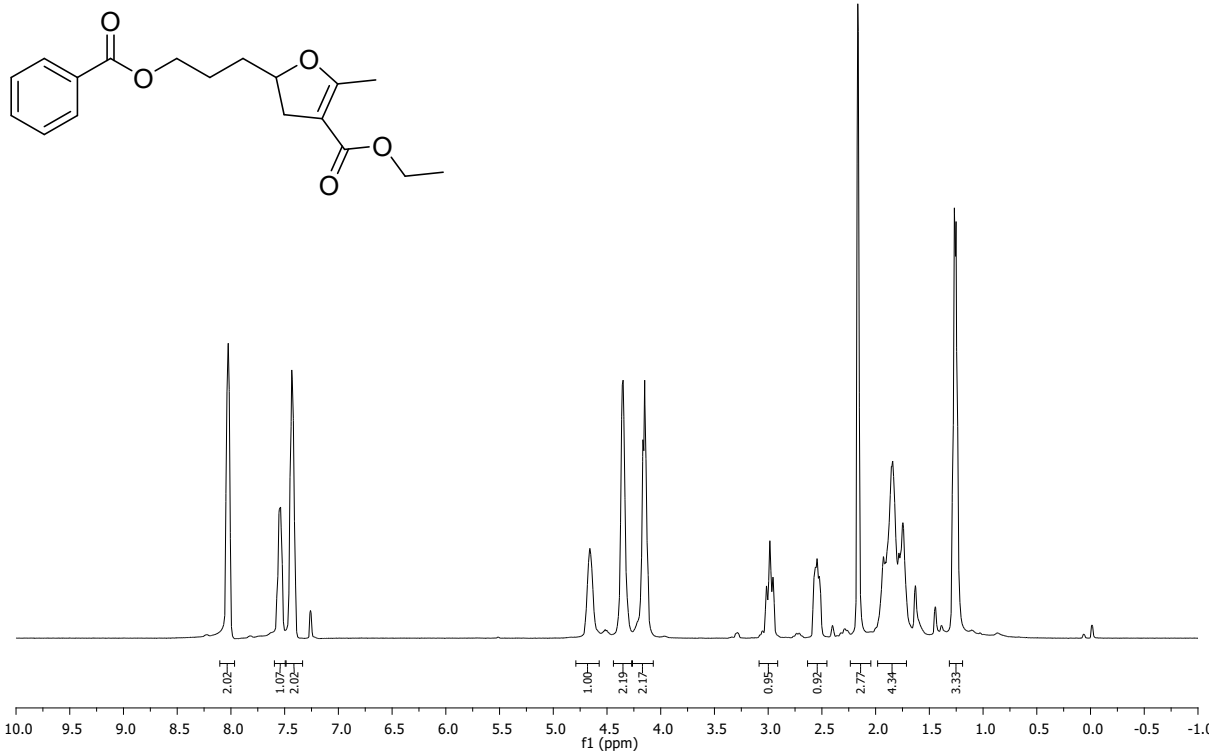

167.76  
166.66  
166.38

133.05  
130.38  
129.65  
128.46

101.74

81.92

64.64  
59.53

35.39  
32.78

24.68

14.58  
14.24

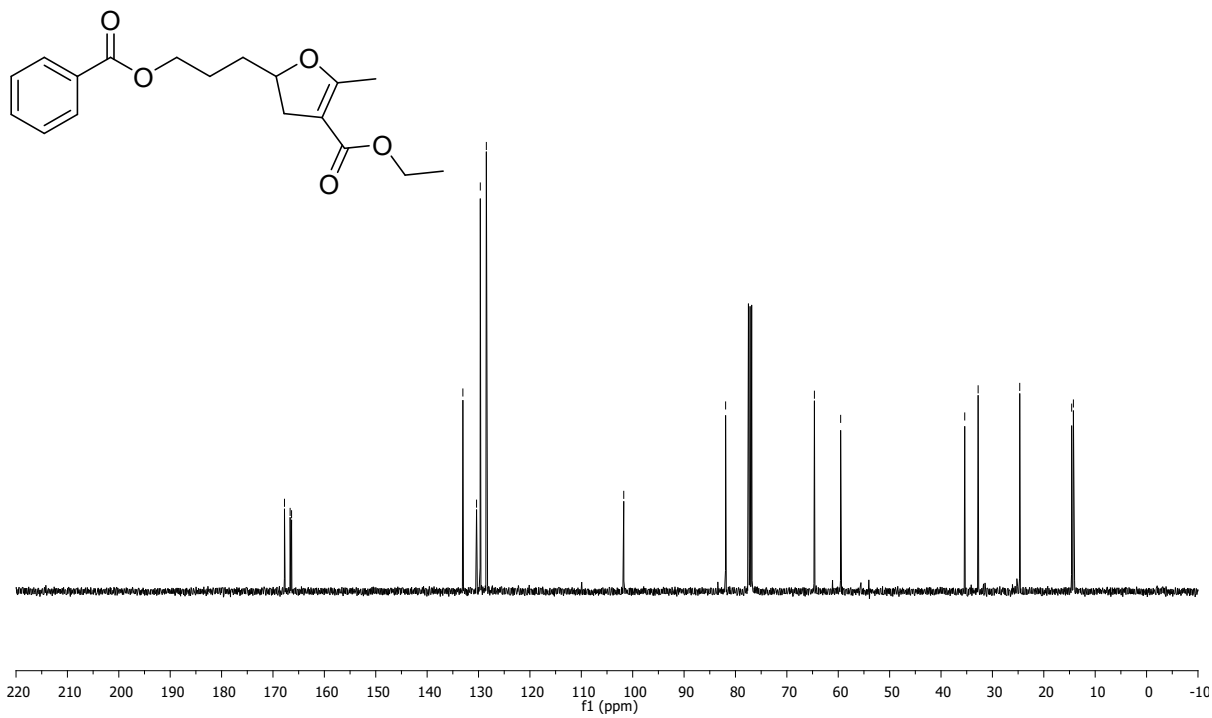

3ae-R

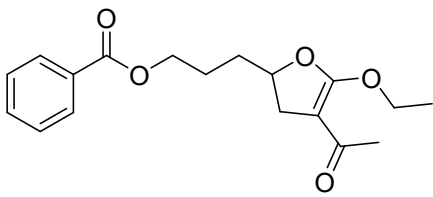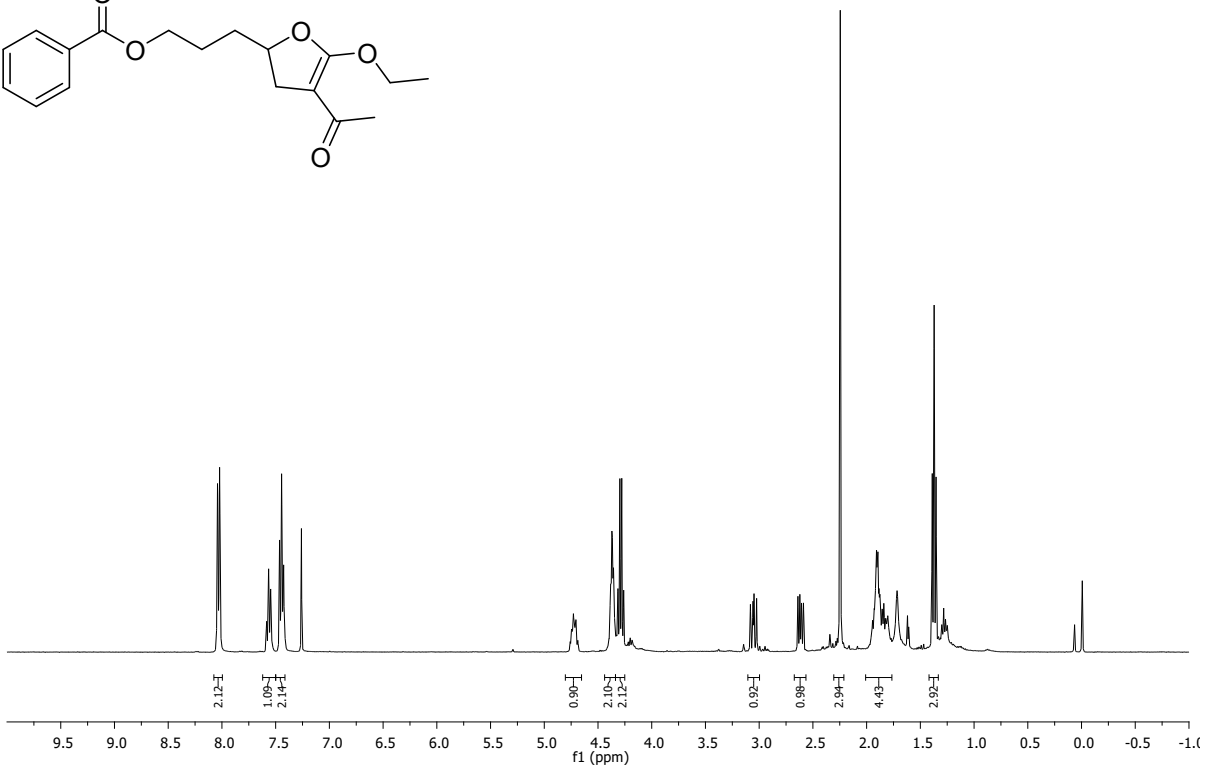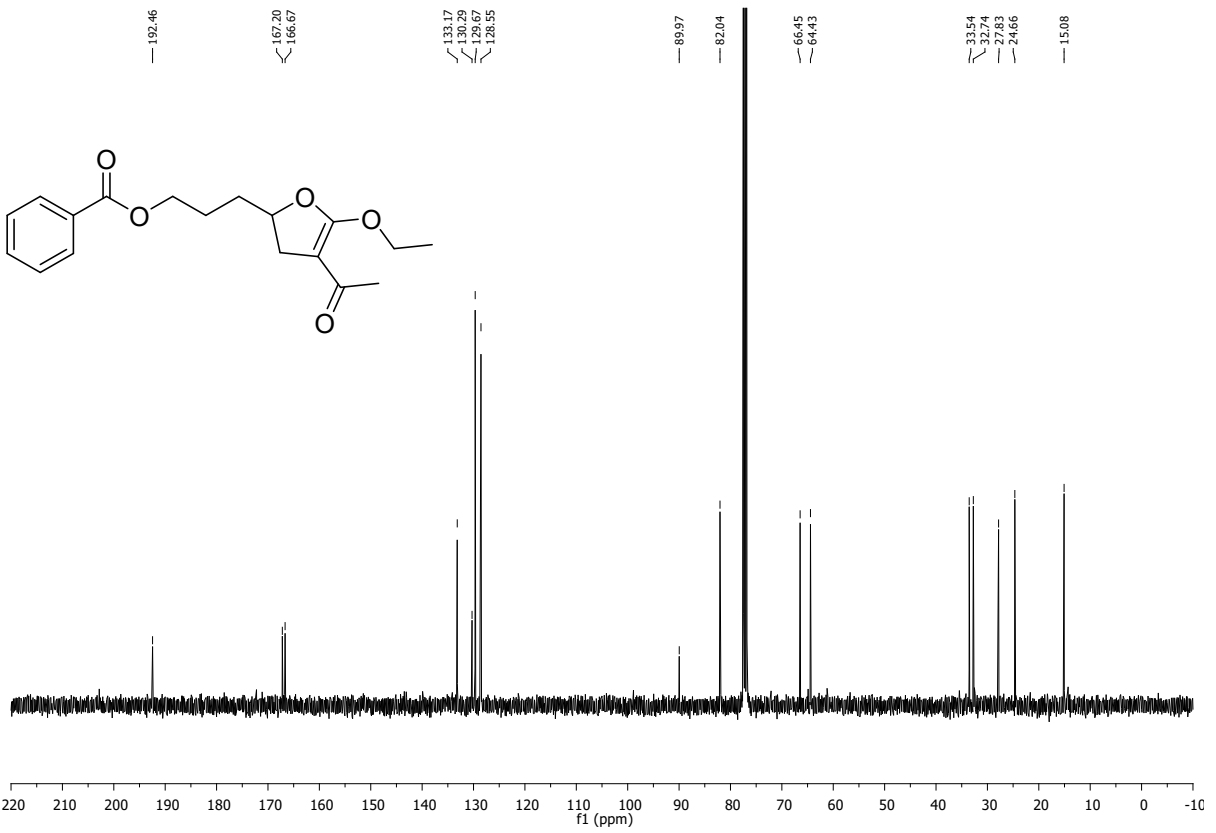

51e

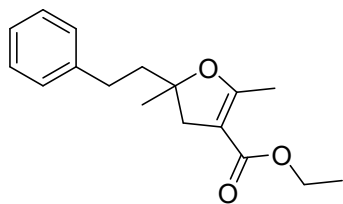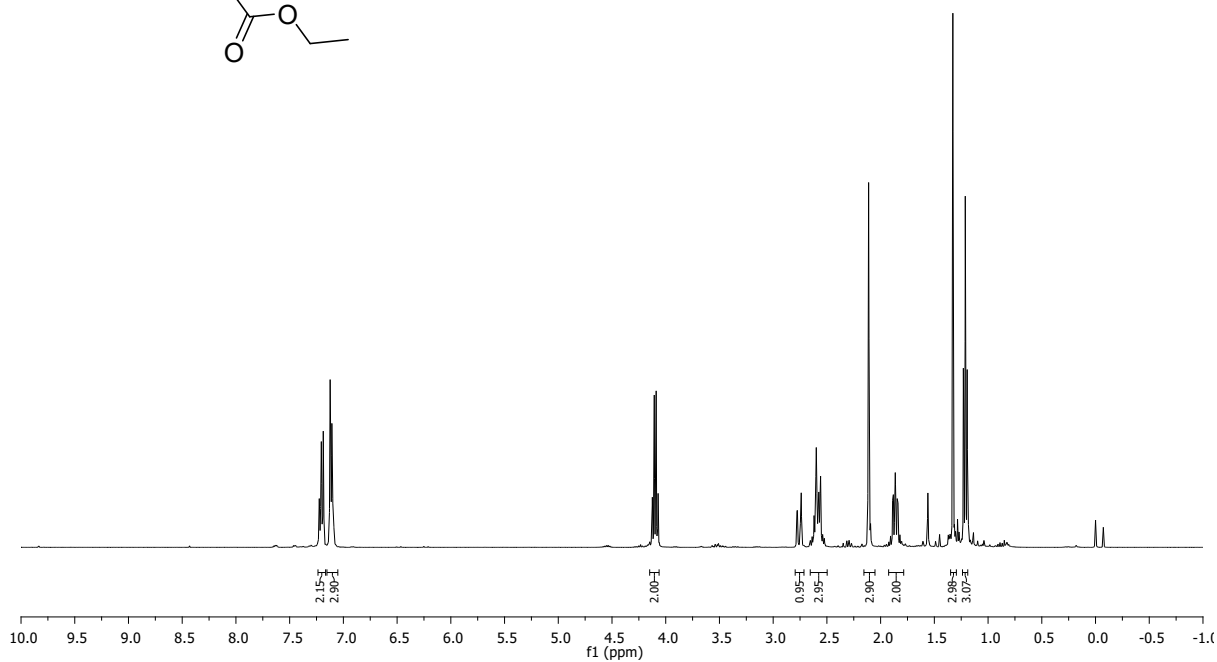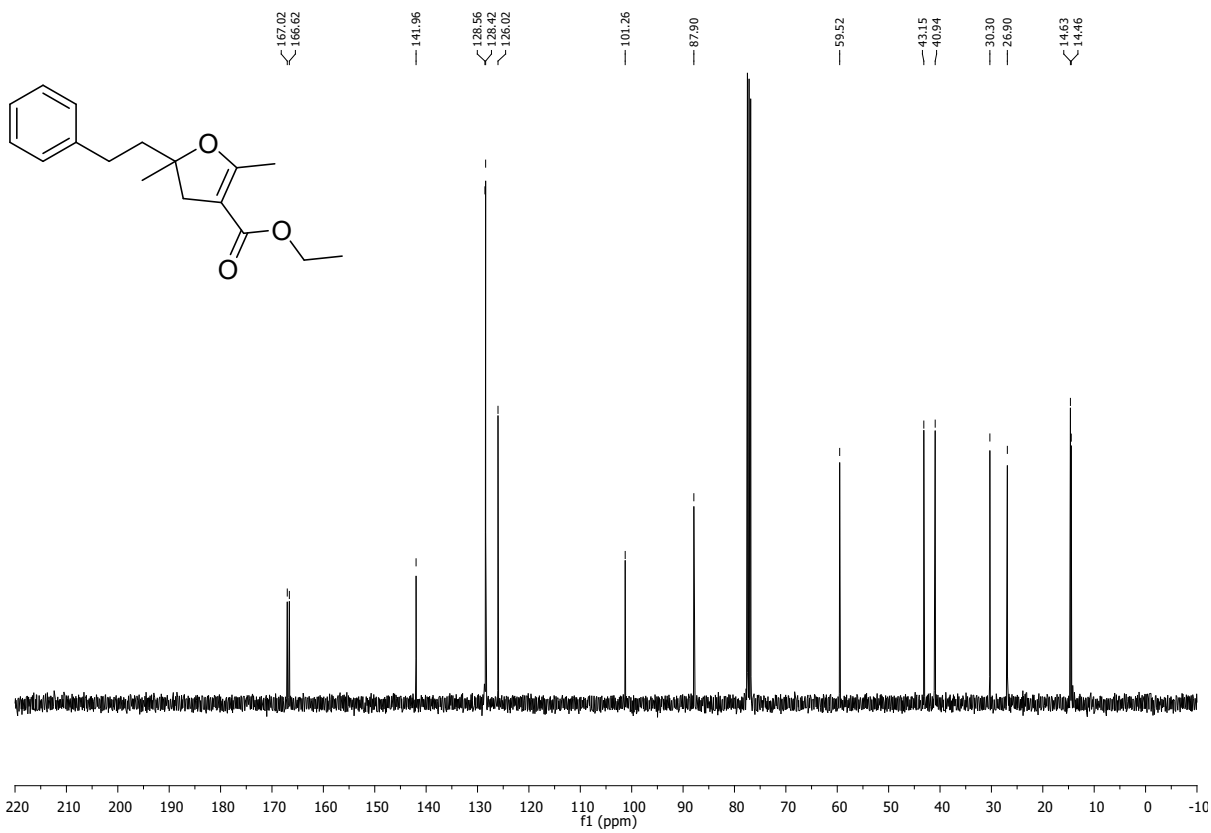

5'e-R



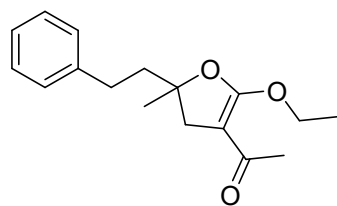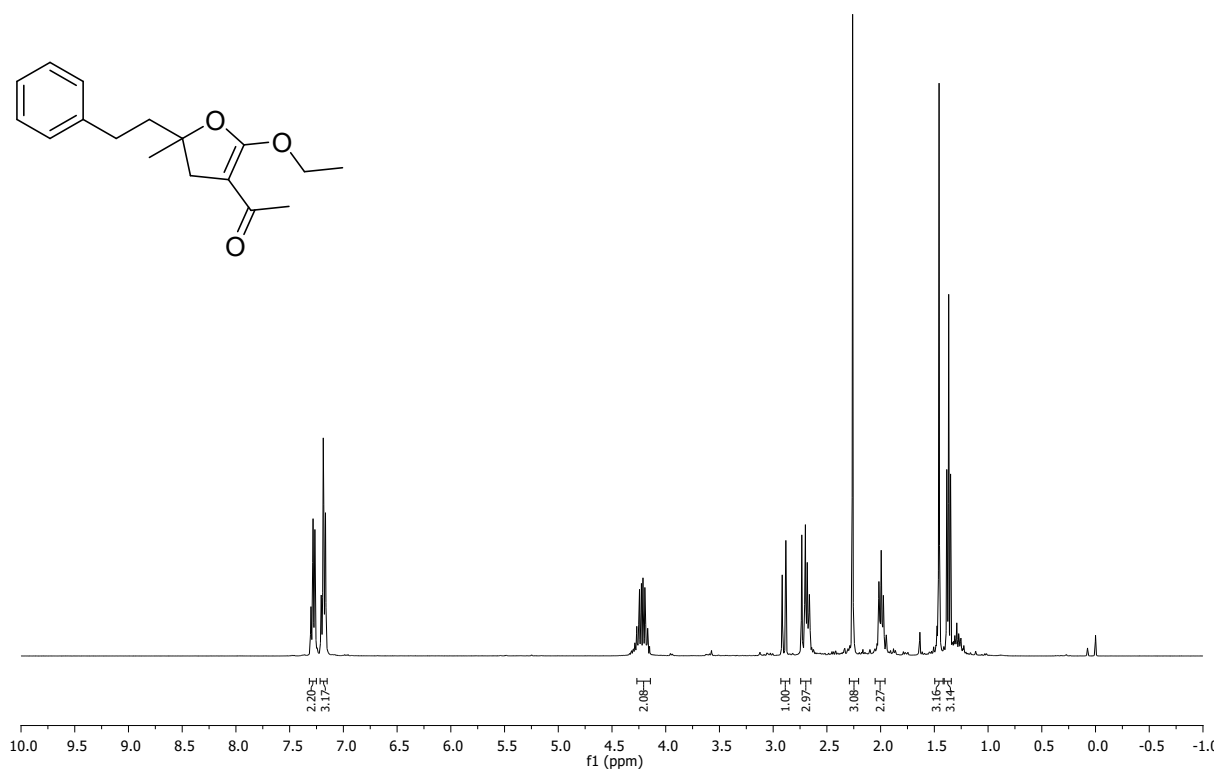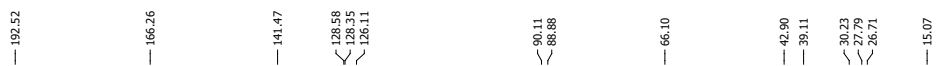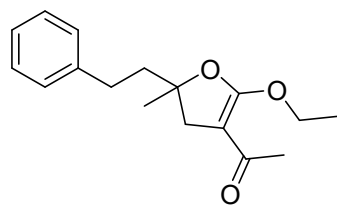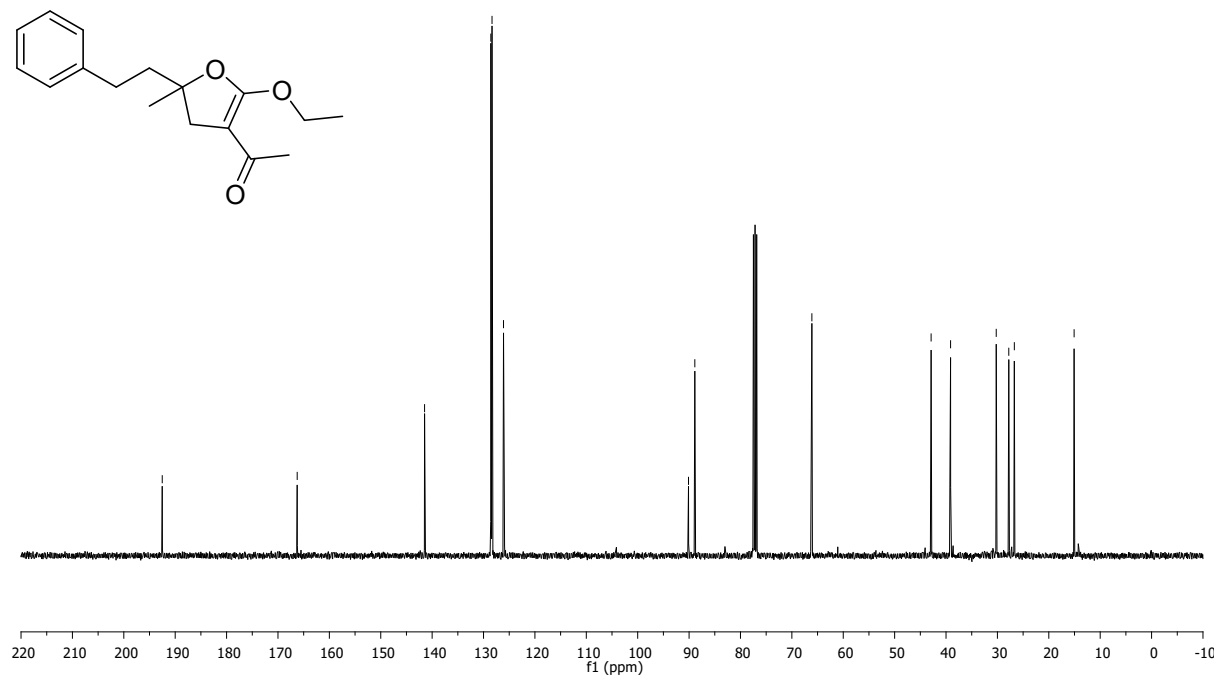

Supplement: d4cc01263a1.pdf [file d4cc01263a1.pdf]
